# Supplementary material for: Role of PRY-1/Axin in heterochronic miRNA-mediated seam cell development
Source: BMC Dev Biol. 2019 Jul 15;19:17. doi: 10.1186/s12861-019-0197-5 (PMC6631683; doi:10.1186/s12861-019-0197-5)
Supplement: Supplementary file 4 — Table S3. A list of novel miRNAs in C. elegans. The IDs of miRNAs are based on the sequential numbering of unique reads in our analysis. For each novel miRNA, the table lists the miRDeep score, read count, chromosomal location, and the sequence. (XLSX 380 kb) [file 12861_2019_197_MOESM4_ESM.xlsx]

## Sheet: All miRNAs from miRNA-Seq
miRNA	mirDeep score	Read counts	Location	Sequence
cel-let-7	62.35	120	chrX-14744112~14744196	UGAGGUAGUAGGUUGUAUAGUU
cel-lin-4	2051.53	4018	chrII+5902234~5902316	UCCCUGAGACCUCAAGUGUGA
cel-lsy-6	803.13	1578	chrV+10647206~10647291	UUUUGUAUGAGACGCAUUUCGA
cel-mir-1	1554.55	2128	chrI-6172665~6172749	UGGAAUGUAAAGAAGUAUGUA
cel-mir-1018	1049.36	2059	chrX+1879442~1879518	AGAGAGAUCAUUGGACUUACAG
cel-mir-1022	5559.91	10817	chrX-6435389~6435471	AAGAUCAUUGUUAGGACGCCAUC
cel-mir-124	378.45	662	chrIV+11871722~11871805	UAAGGCACGCGGUGAAUGCCA
cel-mir-1817	-6.88	28	chrI-10869360~10869457	UAGCCAAUGUCUUCUCUAUCAUG
cel-mir-1818	1.25	46	chrI-13980851~13980948	AAUCAUAGUUUGGAAACCUCGAC
cel-mir-1819	-2.11	13	chrX+16207868~16207965	UGGAAUGAUUGAGCUUGAUGGAU
cel-mir-1820	11.2	17	chrIV+7767461~7767546	UUUUGAUUGUUUUUCGAUGAUGU
cel-mir-1821	-1.17	651	chrV-3042540~3042637	UGAGGUCUUAUAGUUAGGUAGA
cel-mir-1822	-3.95	2188	chrII+6015516~6015597	CGAGCUGCCCUCAGAAAAACUCU
cel-mir-1823	5.12	15	chrI+12608615~12608692	UACUGGAAGUGUUUAGGAGUAA
cel-mir-1824	26.24	51	chrI+13513946~13514033	UGGCAGUGUUUCUCCCCCAACUU
cel-mir-1828	37.44	58	chrI+10600441~10600524	ACUGGAAGCAUUUAAGUGAUAGU
cel-mir-1829a	117.35	246	chrX-15588233~15588312	AAGGGGACUUCUAAUUGUUUGUA
cel-mir-1829b	313.98	609	chrX+14977039~14977118	AAGCGAUCUUCUAGAUGGUUGUA
cel-mir-1829c	810.83	1585	chrX-15236285~15236365	AAGCGAAAUUCAAGAUGGUUGUA
cel-mir-1830	351.9	389	chrII-4371832~4371921	CCUAGGAAAUGAGAAAACUCGGC
cel-mir-1832b	-1.35	3	chrIV-17092818~17092902	CAGCGAAUCGCUCGGCCCACU
cel-mir-2	20220	39391	chrI-9372764~9372848	UAUCACAGCCAGCUUUGAUGUGC
cel-mir-2207	-0.26	7	chrII+11600224~11600321	GAAUUGAGACUGUGUAUAAGA
cel-mir-2207*	-3.24	2	chrII+11600231~11600328	UUAUGCACAGGCUCAAUGCA
cel-mir-2208a	1.71	19	chrIV+1021762~1021859	AAGUGUACCCGAAUCUGAUAUCC
cel-mir-2208b	2.09	47	chrIV+1026569~1026666	AAGUGUACCCGGAUCUGAUAUCC
cel-mir-2209a	-0.2	965	chrIV+1027078~1027175	AGAGAUCAGCGGUUACACUACA
cel-mir-2209b	0.99	53	chrIV-1021293~1021390	AGAGAUGAGCGGUUGUGCUUC
cel-mir-2209c	13.96	26	chrIV+1027209~1027291	AAAAGACCACCGGUUACACUACA
cel-mir-2210	-2.6	58	chrIV+10914571~10914668	UAAAGUCGAUUGCUCUACCCAC
cel-mir-2211	-7.09	4	chrI+9447327~9447424	UCAGGUAGAAUUUAGAGGAGAA
cel-mir-2212	-4.94	3	chrX+16207747~16207844	UGGCAGAUCAUAGGCUGACUUUG
cel-mir-2216	2.05	102	chrII-10867027~10867124	GCACAUUUUAAGUCGGUAGGC
cel-mir-2217	0.97	141	chrIV-5280057~5280154	UCGACCCUUGUGCCUGUUUCGGU
cel-mir-2218a	2.62	1	chrI+13812574~13812653	CAAACUACAAGUUUUAAGCCUCA
cel-mir-2218b	-2.42	3	chrI-13834854~13834951	AAAUUUGUAGUUUGUAGUGAGA
cel-mir-2219	20.9	26	chrV-2924569~2924663	UUUCUCUCGCACAUCGUCAGCU
cel-mir-2220	-3.95	15	chrX+1873791~1873888	UCAAUUGUUUGUGGACUUACAG
cel-mir-2221	1.3	1	chrX+1390864~1390945	UGGCGGUUUGCAUUCACUUACA
cel-mir-228	2.34805e+06	4597473	chrIV+5562020~5562105	AAUGGCACUGCAUGAAUUCACGG
cel-mir-230	12620.2	12877	chrX+5803862~5803950	ACUUGGUCGGCGAUUUAAUAUUA
cel-mir-231	781.58	1390	chrIII-7544996~7545083	UAAGCUCGUGAUCAACAGGCAGA
cel-mir-232	1217.54	2311	chrIV-10994152~10994238	UAAAUGCAUCUUAACUGCGGUGA
cel-mir-233	10161.2	19533	chrX-12078523~12078608	UUGAGCAAUGCGCAUGUGCGGGA
cel-mir-234	785.89	1547	chrII-14466192~14466278	UUAUUGCUCGAGAAUACCCUU
cel-mir-235	1.07448e+06	2107482	chrI-6162296~6162381	UAUUGCACUCUCCCCGGCCUGA
cel-mir-236	12465.2	24437	chrII-7030143~7030227	UAAUACUGUCAGGUAAUGACGCU
cel-mir-237	9254.39	18119	chrX+8154040~8154118	UCCCUGAGAAUUCUCGAACAGCU
cel-mir-238	1.54	108058	chrIII-8867251~8867362	UUUGUACUCCGAUGCCAUUCAGA
cel-mir-239a	170.43	276	chrX+11792383~11792467	AGUGUCUAGUCUAGUGCAAACA
cel-mir-239b	1.24	151	chrX-11791239~11791356	UUUGUACUACACAAAAGUACUG
cel-mir-240	204.18	332	chrX+7882585~7882666	AUACUGGCCCCCAAAUCUUCGCU
cel-mir-241	162.55	257	chrV-14366177~14366263	UGAGGUAGGUGCGAGAAAUGA
cel-mir-242	0.51	21014	chrIV+4274221~4274324	UUGCGUAGGCCUUUGCUUCGAGA
cel-mir-243	13708.3	25253	chrIV+4450776~4450865	CGGUACGAUCGCGGCGGGAUAUC
cel-mir-244	1.26	3132	chrI-4684327~4684410	UCUUUGGUUGUACAAAGUGGUA
cel-mir-245	-1.09	533032	chrI+7887375~7887459	AUUGGUCCCCUCCAAGUAGCUC
cel-mir-246	2336.86	4592	chrIV+10940121~10940204	UUACAUGUUUCGGGUAGGAGCU
cel-mir-247	0.67	14	chrX+4756935~4757032	UGACUAGAGCCUAUUCUCUUCU
cel-mir-248	-4.07	3414	chrX-2262370~2262467	UACACGUGCACGGAUAACGCUCA
cel-mir-249	2371.87	4649	chrX-3006431~3006518	UCACAGGACUUUUGAGCGUUGCC
cel-mir-250	2687.05	3129	chrV-11769906~11769991	AAUCACAGUCAACUGUUGGCA
cel-mir-251	-1.4	643	chrX+11004669~11004766	UUAAGUAGUGGUGCCGCUCUUA
cel-mir-252	8304.38	16271	chrII-11446803~11446886	AUAAGUAGUAGUGCCGCAGGUAA
cel-mir-253	1961.47	3843	chrV-5780504~5780589	UUAGUAGGCGUUGUGGGAAGGG
cel-mir-254	3516.42	6888	chrX-11333476~11333558	UGCAAAUCUUUCGCGACUGUAGG
cel-mir-255	12.75	31	chrV+5440637~5440716	AAACUGAAGAGAUUUUUUACAG
cel-mir-258-1	-5.93	3	chrX+227957~228054	GAAUACUGUAGAAGGAAGCCU
cel-mir-258-2	-5.93	3	chrX+237373~237470	GAAUACUGUAGAAGGAAGCCU
cel-mir-259	192.02	238	chrV-10539011~10539094	AAAUCUCAUCCUAAUCUGGUAGC
cel-mir-271	-5.98	2	chrX+3411984~3412081	UUUUCAAUCUGCGACUCGGCGAU
cel-mir-2953	0.44	7	chrII+6747131~6747211	UACAGAAGUGUUCGUGAAAAUA
cel-mir-34	8467.46	11324	chrX-2969754~2969833	ACGGCUACCUUCACUGCCACCC
cel-mir-355	0.32	750	chrII-11833473~11833570	UUUGUUUUAGCCUGAGCUAUG
cel-mir-356b	2404.48	4707	chrIII-7860089~7860177	UUUGUUCGCGUUGCUCAACCACA
cel-mir-357	65.49	132	chrV-8580532~8580615	AAAUGCCAGUCGUUGCAGGAGU
cel-mir-358	48.89	74	chrV-8580848~8580936	ACCUGGCCAGGCAUUCCAACUGU
cel-mir-359	-7.27	121	chrX+3004332~3004429	UCACUGGUCUUUCUCUGACGAA
cel-mir-359*	0.75	121	chrX+3004277~3004374	UCACUGGUCUUUCUCUGACGAA
cel-mir-360	0.4	9	chrX+5919113~5919210	ACCGUAAUCCCGUUCACAAUA
cel-mir-392	118.93	168	chrX+13597179~13597259	AGCAUUCGUGGUUGAGGAUAUC
cel-mir-41	32.06	40	chrII+11538249~11538347	GGUGGUUUUUCUCUGCAGUGAUA
cel-mir-42	786.81	1462	chrII+11889750~11889839	UCACCGGGUUAACAUCUACAGA
cel-mir-43	159.66	308	chrII+11889853~11889939	UAUCACAGUUUACUUGCUGUCGC
cel-mir-44	384411	750044	chrII+11889964~11890052	UGACUAGAGACACAUUCAGCU
cel-mir-45	384394	750044	chrII-11880884~11880973	UGACUAGAGACACAUUCAGCU
cel-mir-46	46044.7	67136	chrIII+13660418~13660507	UGUCAUGGAGUCGCUCUCUUCA
cel-mir-47	18055.2	33651	chrX+13921190~13921274	UGUCAUGGAGGCGCUCUCUUCA
cel-mir-48	1766.23	3328	chrV-14364409~14364489	UGAGGUAGGCUCAGUAGAUGCGA
cel-mir-4805	2	60	chrII+1061646~1061743	AAAUUUUGAGAUUUUCCGCACA
cel-mir-4806	66.39	107	chrII-12346238~12346311	CACUUACCGGCUGAGCCAUGC
cel-mir-4807	-4.32	132	chrX+1872434~1872531	AAAUGCGACUUCUGGGCUUACAG
cel-mir-4808	3.24	25	chrX+1872936~1873013	AAGCUCUAUUCUCUCUUACAG
cel-mir-4809	-2.32	83	chrX+1873611~1873708	UAAUACAACUUCUGGGCUUCCA
cel-mir-4810	-3.99	51	chrX+1875701~1875798	UGAGUAUCGCAUCAACUUACAG
cel-mir-4811	33.69	66	chrX-7185302~7185383	UAUAACACUCGUAUUGUUCGCU
cel-mir-4813	1.51	1535	chrIII+4571591~4571688	UUCAAUAUACCGGAUGGUCU
cel-mir-4814	151.37	201	chrIII-13728319~13728404	UUCUCAACCAACUUUGGCCACU
cel-mir-4815	-3.79	1	chrIV-5668916~5669013	UGUAUGAGCAAAAUGCGAGGAA
cel-mir-4816	98.98	151	chrI+6185072~6185156	AUCUACAAUUUUCGCACUUACAG
cel-mir-49	10296.1	18174	chrX+9989232~9989316	AAGCACCACGAGAAGCUGCAGA
cel-mir-4923b	5.35	16	chrX+1879582~1879702	AACGGCGGCAAUUUGUUUACAG
cel-mir-4929	-3.37	30	chrII-13461696~13461793	AAUGCACCACAUCUUACGCUCA
cel-mir-4935	-5.71	1	chrV+18562461~18562558	GCCGGCGAGAGAGGUGGAGAGCG
cel-mir-4935*	-2.07	5	chrV+18562458~18562555	CCCUCCACUCUCUCGCCGCGGC
cel-mir-50	25026.8	49005	chrI+1738623~1738726	UGAUAUGUCUGGUAUUCUUGGGU
cel-mir-51	207940	407814	chrIV-11025999~11026086	UACCCGUAGCUCCUAUCCAUGUU
cel-mir-54	4298.14	7583	chrX-13144919~13145040	AGGAUAUGAGACGACGAGAACA
cel-mir-5545	2.34	1	chrI+11885597~11885682	CCGGUUUGAUCUACAAAAAAUGC
cel-mir-5546	0.87	894	chrI-2888461~2888544	GAAAAAUUGCGCGCAUGGGUUG
cel-mir-5547	5.38	5	chrII+12238550~12238636	UGCCUAUCGGCCUAAAAGUUGUC
cel-mir-5550	1.98	7	chrIV+409763~409860	AGUGCAAAUGAAAUCGUGGGC
cel-mir-5552	-3.33	3	chrV+18036697~18036794	UCUGCCAGACUACAAACCACACA
cel-mir-5553	-3.96	2	chrX-8077515~8077598	AUGGGUAGCACGUGGCAAGACUA
cel-mir-5592-2	78.36	75	chrX+13759169~13759254	GCCCUUACCGUUUAAUACAUG
cel-mir-5593-1	24.01	31	chrII+431481~431564	GAUGGCUGGAAUAUCGGUAUUC
cel-mir-5593-2	24.01	31	chrII+438388~438471	GAUGGCUGGAAUAUCGGUAUUC
cel-mir-5594	1.22	3	chrII-11865057~11865144	UUUGAACUACAGUACUCUUCA
cel-mir-5595	-3.51	1	chrII-14399481~14399578	AGAGCGUGUGGAGAAGAGAGA
cel-mir-57	158073	309819	chrII-7850460~7850542	UACCCUGUAGAUCGAGCUGUGUG
cel-mir-58	206836	394125	chrIV+3233254~3233346	UGAGAUCGUUCAGUACGGCAA
cel-mir-58b	2.95	5	chrIV-6660441~6660517	GACUCGGUGUGUGAUCUCUUA
cel-mir-59	297.73	589	chrIV-11309137~11309222	UCGAAUCGUUUAUCAGGAUGAUG
cel-mir-60	3431.6	6313	chrII-6328670~6328756	UAUUAUGCACAUUUUCUAGUUCA
cel-mir-62	-3.8	565	chrX+12692507~12692604	UGAUAUGUAAUCUAGCUUACAG
cel-mir-63	2566.26	2520	chrX-17598699~17598787	UCUAACUCGUCGGUAGUCAUCGU
cel-mir-64	377921	740988	chrIII+2172811~2172936	UAUGACACUGAAGCGUUACCGAA
cel-mir-67	117.77	166	chrIII-5931309~5931418	CGCUCAUUCUGCCGGUUGUUAUG
cel-mir-70	9455.85	18483	chrV-6665522~6665604	UAAUACGUCGUUGGUGUUUCCAU
cel-mir-71	107411	207159	chrI-9379928~9380025	UGAAAGACAUGGGUAGUGAGACG
cel-mir-72	991680	1939626	chrII+2452848~2452955	AGGCAAGAUGUUGGCAUAGCUGA
cel-mir-73	250338	491019	chrX+2368769~2368853	UGGCAAGAUGUAGGCAGUUCAGU
cel-mir-74	4833.22	6862	chrX+2369033~2369127	UGGCAAGAAAUGGCAGUCUACA
cel-mir-75	971.47	1624	chrX+2372458~2372539	UUAAAGCUACCAACCGGCUUCA
cel-mir-76*	1.67	20453	chrIII+3142032~3142129	UUCGUUGUUGAUGAAGCCUUGA
cel-mir-77	98.87	122	chrII+12519217~12519296	UUCAUCAGGCCAUAGCUGUCCA
cel-mir-784	18.96	33	chrX-8074873~8074956	UAUGUACAAAUGUUGCGCUGCC
cel-mir-786	0.09	23	chrX+7882691~7882788	UAAUGCCCUGAAUGAUGUUCAAU
cel-mir-787	1.38	1536	chrX+11294632~11294729	UAAGCUCGUUUUAGUAUCUUUCG
cel-mir-788	182.44	343	chrX-8485238~8485320	UCCGCUUCUAACUUCCAUUUGCA
cel-mir-789-1	-1.34	3039	chrIV-16740660~16740751	AAUUGAUGACCCAGACAAGGACU
cel-mir-789-2	2.19	9437	chrIV-17309252~17309365	AAUUGAUGACUCAGGCAGGGACU
cel-mir-79	1189.84	1890	chrI+9332945~9333030	AUAAAGCUAGGUUACCAAAGCU
cel-mir-790	1200.72	1998	chrIV+5566408~5566489	CUUGGCACUCGCGAACACCGCG
cel-mir-791	812.47	1444	chrX+5809315~5809399	ACCUUAUCCGUUGUAGCCAAAGU
cel-mir-792	-0.05	119	chrV-3042093~3042190	UUGAAAUCUCUUCAACUUUCAGA
cel-mir-793	-0.18	19329	chrX+13857884~13857981	UGAGGUAUCUUAGUUAGACAGA
cel-mir-794	371.58	733	chrI+12595684~12595762	UGAGGUAAUCAUCGUUGUCACU
cel-mir-795	51.35	81	chrI+12594563~12594650	UGAGGUAGAUUGAUCAGCGAGCU
cel-mir-796	25.42	31	chrX-1798925~1799006	UGGAAUGUAGUUGAGGUUAGUAA
cel-mir-797	-5.51	3	chrX+4757083~4757180	UAUCACAGCAAUCACAAUGAGAA
cel-mir-799	-2.59	18	chrX-8600595~8600692	UGAACCCUGAUAAAGCUAGUGG
cel-mir-80	-2.28	731878	chrIII-8865194~8865279	UGAGAUCAUUAGUUGAAAGCCGA
cel-mir-800	77.64	116	chrX-380914~380996	GCCAAACUCGGAAAUUGUCUGC
cel-mir-81	323276	634081	chrX+2431079~2431163	UGAGAUCAUCGUGAAAGCUAGU
cel-mir-82	919940	1804399	chrX-2435253~2435340	UGAGAUCAUCGUGAAAGCCAGU
cel-mir-83	835.65	1559	chrIV+7841625~7841711	UAGCACCAUAUAAAUUCAGUAA
cel-mir-84	-5.12	602	chrX-16022328~16022409	UGAGGUAGUAUGUAAUAUUGUA
cel-mir-86	37346.6	62705	chrIII-11936544~11936630	UAAGUGAAUGCUUUGCCACAGUC
cel-mir-87	14357.1	27700	chrV-12038670~12038757	GUGAGCAAAGUUUCAGGUGUGC
cel-mir-90	1.36606e+06	2679127	chrIII-8873907~8873998	UGAUAUGUUGUUUGAAUGCCCCU
novelMiR_0	-6.28	1	chrI+16486~16583	GCGGAUCUUCGUGCUCGUAAU
novelMiR_1	-7.68	1	chrI+75298~75395	UUGGACACGGAGAAUUUGGAGA
novelMiR_100	-8.39	1	chrI+1340857~1340954	CUAUGGCCAAGCUGAAGAAGUC
novelMiR_1000	-6.63	1	chrII+7740038~7740135	AGGUUACAUCUUCUGGUAUUUG
novelMiR_1001	-7.07	1	chrII+8045417~8045514	UGCUUCUAUGCGUUCCGUC
novelMiR_1002	-8.53	1	chrII+8049230~8049327	CCUUGAUCGAUGUAAGAGAUG
novelMiR_1003	-8.69	1	chrII+8083898~8083995	GAACGAGCUCGGCGUCUC
novelMiR_1004	-4.88	1	chrII+8128820~8128917	CCCAGGCUGUUGAGCGGC
novelMiR_1006	-8.81	1	chrII+8168042~8168139	GCUGUGUCUGGACGGUUUGAUGC
novelMiR_1007	-7.81	1	chrII+8186490~8186589	CUACUGGAGCCACAUUGACUG
novelMiR_1008	-4.88	1	chrII+8255442~8255539	GUUUGCCGGAUAUCAGAUUUGC
novelMiR_1009	-3.99	1	chrII+8289100~8289197	CUUCCUAAUGAGUCCUGACA
novelMiR_101	-7.53	1	chrI+1351104~1351201	CCGGAUGGAAGUAUGAUGAGAUU
novelMiR_1010	-4.31	4	chrII+8289883~8289987	AUACCGGCAGUAUUUUGGGGUCU
novelMiR_1012	-5.12	1	chrII+8445549~8445646	GAGCACGUUGGGCGAGCA
novelMiR_1013	-6.92	2	chrII+8466232~8466329	UCAAAGCUCCGCCAGCCAGA
novelMiR_1017	-8.33	1	chrII+8584421~8584518	CGUGUUGCUCUGAGCUCAGCCU
novelMiR_1018	-2.89	52	chrII+8602912~8603004	UUCCAUUAAGUAGUCCCGUACG
novelMiR_1019	-7.73	1	chrII+8603764~8603861	CCCAGAGCGUCGGAUUGAA
novelMiR_102	-6.4	2	chrI+1354502~1354599	UGCAAUUUGCCGAUUUGCCGGA
novelMiR_1020	-9.03	1	chrII+8906078~8906175	AAUGUGGAAUUAUCGCCGUCGCA
novelMiR_1022	-7.76	2	chrII+8931477~8931574	AGUUGCUGGCGUCCUUGGC
novelMiR_1023	-3.29	2	chrII+8933434~8933535	GAUGCUGUUUACGCUGGACA
novelMiR_1024	-6.88	1	chrII+8960360~8960457	UUUGAGCGUCGUUGCAGGGCAUC
novelMiR_1025	-8.07	1	chrII+8969981~8970078	GUUUGUCUUGUUGGACGGAAGC
novelMiR_1026	-5.59	1	chrII+9029360~9029449	AUUCUCCGUCGUCUUCUUCGUC
novelMiR_1028	-2.69	14	chrII+9060497~9060594	CUCGCCUCGUCGUCGCUCCGA
novelMiR_103	-7.12	1	chrI+1358295~1358392	CAGCAGGCCGAGAUGUGGGAG
novelMiR_1030	-7.94	1	chrII+9109182~9109279	UCCACAAACUCGAAAGGCAUG
novelMiR_1031	-8.79	2	chrII+9118320~9118385	GAGCUGUCUCGUUGAGCU
novelMiR_1032	-3.9	1	chrII+9203123~9203220	UCCGGAAUGGUCCAGAAUUUUCU
novelMiR_1033	-8.8	1	chrII+9248064~9248161	GGCCGGUUACUGUAGUUUUAGC
novelMiR_1034	-8.1	1	chrII+9321987~9322084	CGGAUAGGCACACGGAUUG
novelMiR_1035	-4.25	1	chrII+9388882~9388979	CACCCACGAUUUCAUUUGAACUG
novelMiR_1036	-6.03	3	chrII+9403700~9403791	UUUCACCCAACUCUUGCCAAAC
novelMiR_1037	-7.33	1	chrII+9415751~9415842	GAAUGACGUCAUCGGAAAUGU
novelMiR_1038	-7.15	1	chrII+9480745~9480842	AUUCUGUGUGGUGUUGGUGUG
novelMiR_104	-3.54	2	chrI+1362045~1362142	CGUCCAUCGACUUUAAAAUACC
novelMiR_1040	-7.13	1	chrII+9595284~9595381	CGUCACUGUCGAAGAAGCC
novelMiR_1041	-8.51	1	chrII+9932709~9932806	CUAGUCAGAACUGUCCAUGCAC
novelMiR_1042	-8.21	1	chrII+10000331~10000402	UUUGUUUAGAGCUUGGCU
novelMiR_1043	-7.18	1	chrII+10020701~10020798	AUCGCCGAUCGCCGAUUGC
novelMiR_1044	-7.85	1	chrII+10069110~10069207	AGUCUAAGUAGUGUAGUCGGGU
novelMiR_1045	-7.13	1	chrII+10096933~10097030	GCGGGUAUGCGGACAAGGCGUC
novelMiR_1046	-8.83	1	chrII+10096877~10096974	GCGGGUAUGCGGACAAGGCGUC
novelMiR_1047	-8.27	1	chrII+10097017~10097114	AGCAAGAUCUGGCCAGAGUUUG
novelMiR_105	-7.69	1	chrI+1363990~1364087	UUCGGAUAUUUUCUAAUAAUGA
novelMiR_1050	-7.98	1	chrII+10161739~10161836	CCACGGGAUUUAUGACUUUGCA
novelMiR_1051	-7.23	1	chrII+10172013~10172110	CUGACCGUUCGCCUCGAGAAACC
novelMiR_1052	-7.82	3	chrII+10197803~10197900	GCACAUGGGCGCCUGGACU
novelMiR_1053	-8.78	1	chrII+10315581~10315678	CGUUUGCGCAGUUGGCUGUACC
novelMiR_1054	-4.92	1	chrII+10374300~10374397	UUGCCAAAGUCUUUUGCCAAAC
novelMiR_1055	-6.16	1	chrII+10506147~10506244	AGUGACGAUUAUUGGGGAAAAC
novelMiR_1056	-5.83	3	chrII+10548879~10548976	AUUCCUGGUCGUCGGCGCUCU
novelMiR_1057	-5.75	1	chrII+10555566~10555663	UGCAAGAUGGUAGAGUGUGCGAG
novelMiR_1058	-7.43	1	chrII+10576092~10576189	GUACAGACGACUCUCGAUGGCG
novelMiR_1059	-6.17	1	chrII+10580187~10580284	GUGAAGCGUUGGGAGCAAUUGC
novelMiR_106	-0.53	7	chrI+1376022~1376119	AUCUCGCCGUCCAUCGACUUUA
novelMiR_1060	-9.01	1	chrII+10614332~10614429	UUGUAAAUCGAAUUGAGGCUUCU
novelMiR_1061	-0.5	2	chrII+10743660~10743754	AGUGGGCGCUCUGUGUGUGUG
novelMiR_1062	-6.08	1	chrII+10804957~10805054	UCUGAUUGGCCGGGUUCCGCGA
novelMiR_1063	-6.28	1	chrII+10832129~10832226	UAAAUCGACACAAGCUCUACAGU
novelMiR_1064	-5.08	1	chrII+10851840~10851937	CAAUCAACGAAUAAACGCCGAG
novelMiR_1065	-4.56	1	chrII+10868902~10868999	GCUCCGUUUCGCAACUUUCCU
novelMiR_1066	-8.86	1	chrII+10869893~10869990	CGCCAGGCUCACUACAAG
novelMiR_1067	-4.3	1	chrII+10870285~10870397	CGAGAAGCAAGAUGAGAUCG
novelMiR_1068	-8.38	1	chrII+10891491~10891588	GAUUCGCUGUACUCGGACUGACA
novelMiR_1069	-2.93	1	chrII+10930560~10930641	AGAAUGGAAUUGGGCUCACGG
novelMiR_107	-5.78	3	chrI+1383102~1383199	UUUUUCACAUCGAUAUUCGGA
novelMiR_1070	-8.18	1	chrII+10931114~10931211	GAGGUUUGUUGGAAAAUA
novelMiR_1071	-8.88	2	chrII+10994236~10994333	CGGGGAUGGAGAGUUUUCGGAGC
novelMiR_1072	-4.75	1	chrII+11015985~11016082	GUCCGUCGGCUCCAGCGUUUCC
novelMiR_1073	-4.28	1	chrII+11015929~11016026	GUCCGUCGGCUCCAGCGUUUCC
novelMiR_1074	-8.13	1	chrII+11045865~11045962	UGCUUCCGGUCUAUGCUUCUGCU
novelMiR_1075	-6.08	1	chrII+11095289~11095386	GUUCCCGACUGACUGAUGGAAGA
novelMiR_1076	-7.79	1	chrII+11095903~11096000	UCAUCGGGUUGUGGAGAAUC
novelMiR_1079	-6.64	1	chrII+11125469~11125566	GAAGGAUGGGACAUCGACAACU
novelMiR_108	26.26	46	chrI+1386670~1386767	UUACCUAUCGGCUUUAAAUGUA
novelMiR_1080	-9	4	chrII+11128350~11128472	UGGUUUUUGUUCUCGGGCCUCC
novelMiR_1081	-5.88	1	chrII+11225745~11225842	CCCGCCUGCCUAUCACCUC
novelMiR_1082	-8.39	1	chrII+11451835~11451899	AGGACUGCGACGACGAGCUG
novelMiR_1083	-6.64	1	chrII+11455175~11455272	CAGUCGUGAUCGUCGCCGCUCCC
novelMiR_1084	-7.98	1	chrII+11459480~11459577	UUACCCAUCUCGAAAUUUAGC
novelMiR_1085	-8.18	1	chrII+11472269~11472366	GUUCGAAAAGUGGAUGCUCGCU
novelMiR_1086	-7.91	3	chrII+11500685~11500782	AAUACGGUACCAGGUCUCGAC
novelMiR_1087	-6.65	2	chrII+11528568~11528676	GUUUGUCAGACGAAGUUCGAAC
novelMiR_1088	-7.58	1	chrII+11593290~11593387	CAAUUGUGAGAGCUCCACGUGG
novelMiR_1089	-9.03	1	chrII+11593234~11593331	CAAUUGUGAGAGCUCCACGUGG
novelMiR_109	-3.22	3	chrI+1387548~1387645	CAUUUAAAGCCGAUAGGUAACC
novelMiR_1090	1.17	22	chrII+11603482~11603579	UUCGAGACAGUUUUUGAGCAACU
novelMiR_1091	-4.87	1	chrII+11693242~11693339	GGUGAUUGCCAUGGCCUUGAC
novelMiR_1092	-5.18	1	chrII+11729590~11729687	CGAGGGAGACGUCAGCAGAG
novelMiR_1093	-7.98	1	chrII+11774348~11774445	GUCCGAAAUGCUCGUGUGGGU
novelMiR_1094	-8.97	1	chrII+11776984~11777081	GCUUUGAGAAUUGUGCGGAUUGG
novelMiR_1096	-7.4	1	chrII+11821951~11822048	GGGAGGAAGCUCGAGCGUCGAU
novelMiR_1097	-7.93	1	chrII+11823013~11823110	GCACCUCUGGAUCCUCGGC
novelMiR_1098	-4.39	1	chrII+11865059~11865156	AAGAGUACUGUAGUUCAAAAUU
novelMiR_1099	-7.7	1	chrII+11881556~11881653	GUUUGUCGAUUUUCCGGA
novelMiR_11	-4.31	1	chrI+318158~318255	ACGUUAGCUUUGCCUCCCCG
novelMiR_110	-1.32	5	chrI+1407783~1407880	CCCGUAAAUCGACACAAGAGC
novelMiR_1100	8.68	15	chrII+11881676~11881760	CAAAUUGUCGAUUUGCCGGAAA
novelMiR_1101	7.39	15	chrII+11881787~11881871	CAAAUUGUCGAUUUGCCGGAAA
novelMiR_1102	-3.58	1	chrII+11905282~11905379	UUAGGCAUAGGCUCAGGCUUAGA
novelMiR_1103	-6.92	1	chrII+11955071~11955168	GGCGUCAGUGGGGGAGCG
novelMiR_1104	-8.18	1	chrII+11969066~11969163	GUCGGUUCAGCGUCAGAAGCGCA
novelMiR_1105	-7.31	1	chrII+11979244~11979341	AUGGUGAUGGUGAGGCUGGAU
novelMiR_1107	-5.13	2	chrII+12055957~12056054	CAAAGCACAAGCCAGUCAUCGGA
novelMiR_1109	-3.7	1	chrII+12103040~12103137	GCACCUUUAAAGAGUACUGUAG
novelMiR_111	-6.4	1	chrI+1427938~1428035	GUUUGCCGGAUAUCAGAUUUGC
novelMiR_1110	-3.75	1	chrII+12103042~12103139	UUACAGUACUCUUUAAAGGCACA
novelMiR_1111	-7.8	1	chrII+12121635~12121732	CCGUUUCCGGUCCGUAGACG
novelMiR_1112	-3.48	2	chrII+12128182~12128279	AUCUCUCCGUCCAUCGACUUU
novelMiR_1113	7.35	9	chrII+12129186~12129266	UUACCUAUCGGCUUUAAAUGU
novelMiR_1114	-3.9	1	chrII+12130469~12130556	CUUCGAACUCCGCCCACUCC
novelMiR_1115	-2.82	3	chrII+12135338~12135435	CAUUUAAAGCCGAUAGGUAACC
novelMiR_1116	-7.89	2	chrII+12198276~12198373	UUGAAAAUUUUGAAUUUGGCGCC
novelMiR_1117	-6.55	4	chrII+12200006~12200103	GCGCGUGUGUCGAUUUACGGGC
novelMiR_1118	-1.68	2	chrII+12203625~12203722	UUUUUGGUCGAUGCGGGCACA
novelMiR_1119	-4.43	1	chrII+12214008~12214105	GAUGAAGCUCCUUGAAUCCU
novelMiR_112	-3.17	1	chrI+1437986~1438083	AGCACUUGUGUCGAUUUACGG
novelMiR_1120	-8.58	1	chrII+12230871~12230968	CCCGGGUUACUGUAGGCUUUCG
novelMiR_1121	25.3	43	chrII+12263445~12263540	UUACCUAUCGGCUUUAAAUGUA
novelMiR_1122	4.56	5	chrII+12281963~12282079	UGCCUAUCGGCCUAAAAGUUGUC
novelMiR_1123	-6.78	2	chrII+12324038~12324135	UUCGGCAAAUUCGGCAAAUCGGC
novelMiR_1124	-7.29	1	chrII+12324040~12324137	GCCGAUUUGCUGGAAAAA
novelMiR_1125	-5.96	1	chrII+12343923~12344020	UAGGCUUAGGCUUAGGUUUAGGC
novelMiR_1126	-8.34	1	chrII+12344857~12344954	AAUCGAACCUGUGAUCUUUUCC
novelMiR_1127	-3.98	1	chrII+12344933~12345030	AUUGUCGGCAUGGCUCAGUGGG
novelMiR_1128	-3.39	2	chrII+12443661~12443758	AUAGCUGGCAAAACCCGGGAGG
novelMiR_1129	-6.4	1	chrII+12471929~12472026	AGUGGCUACACUGUCGUCACU
novelMiR_113	-3.43	2	chrI+1440097~1440194	CGUAAAUCGACACAAGUGCUACA
novelMiR_1130	-7.82	1	chrII+12484974~12485071	UCAUCCUGGUCGCUCUUCUUGC
novelMiR_1131	-1.88	6	chrII+12539519~12539616	GUUCGAUCCGCUCAGUGGU
novelMiR_1132	-2.14	3	chrII+12569619~12569757	GUACCUUCCUGUGAGCUCCAUU
novelMiR_1133	-8.13	1	chrII+12579713~12579810	AAUUUCCGGAAUUGUCGAUUGC
novelMiR_1134	-8.62	1	chrII+12604865~12604962	UUGUCCGGCGGGCGAUUGUCAAU
novelMiR_1135	-8.13	1	chrII+12609079~12609176	UUGGCUCUAGCUUCUUGCCCAAG
novelMiR_1136	-6.4	1	chrII+12609024~12609121	UUGGCUCUAGCUUCUUGCCCAAG
novelMiR_1138	-8.01	1	chrII+12627155~12627252	GCAAUUGAAGACUACUGGUAU
novelMiR_1139	-8.05	1	chrII+12649945~12650042	GAUCCAUCGUGGUGAGACC
novelMiR_114	-6.81	1	chrI+1482627~1482724	CCCGCAUUUUUUGUAGAUCAAGC
novelMiR_1140	-6.46	2	chrII+12657802~12657899	UAGGAGGAGGGUGAGGGGGAGCA
novelMiR_1141	-5.48	2	chrII+12666125~12666222	CCUACCUCUUACCGCCUGAACC
novelMiR_1142	-1.22	6	chrII+12688895~12688992	UACAUUUUCGGCCAGUGGGGC
novelMiR_1143	-7.57	1	chrII+12692389~12692486	CAAAUCGGCAAACCAGCAAUU
novelMiR_1144	-2.97	1	chrII+12693708~12693783	UUCGGUCAGUGGGGCACA
novelMiR_1145	1.43	7	chrII+12706229~12706326	AUCUCGCCGUCCAUCGACUUUA
novelMiR_1146	-3.07	1	chrII+12709450~12709540	UGUUCGUUGAUUUAAGUGCAUU
novelMiR_1147	-7.98	3	chrII+12712204~12712292	CGAUUUGCCGAAUUUGCCGA
novelMiR_1148	-6.85	1	chrII+12717396~12717493	GCCUUUAAACAGUACUGU
novelMiR_1149	-8.08	1	chrII+12720607~12720704	AUGCGCCUUUGAGGAGUACUGU
novelMiR_115	-2.73	3	chrI+1491756~1491853	AAAAUCUCGCCGUCCAUUGACU
novelMiR_1150	-4.42	1	chrII+12722124~12722221	UCCGCCCACUUUUCAACCAAUCA
novelMiR_1151	-8.65	1	chrII+12722736~12722833	CGGAGCAAAUCGCUGAUUGGUC
novelMiR_1152	-7.7	1	chrII+12727262~12727359	GUACGAGUCCGAGAUGAAGA
novelMiR_1153	-7.98	1	chrII+12732694~12732782	UCCGCGCCGAUCCAUCGAUCCGA
novelMiR_1154	-8.9	1	chrII+12735297~12735394	GAGGGCUGGUACGUGGAUU
novelMiR_1155	-4.53	3	chrII+12735879~12735976	ACUUGGCGAGCGAUCUUUGGAU
novelMiR_1156	-6.74	1	chrII+12736184~12736281	AUGAGAACUGCGAUACGA
novelMiR_1157	-5.39	6	chrII+12757739~12757836	CAAUUUGCUGAUUUGCCGGAAAU
novelMiR_1158	-4.8	1	chrII+12758628~12758725	AAAUUGCCGAUUUGCCGGAAGU
novelMiR_1159	-3.38	1	chrII+12763251~12763348	GUAGAUCCGGAAAACGUAGAU
novelMiR_116	1.4	16	chrI+1497563~1497660	UCUCGCCGUCCAUCGACUUUAA
novelMiR_1160	-5.49	1	chrII+12790432~12790529	CUUCGAACUCCGCCCACUCC
novelMiR_1161	-5.44	2	chrII+12823013~12823110	UGCAAUUUGCCGAUUUGCCGGA
novelMiR_1163	-5.25	1	chrII+12836219~12836316	UCUGGAAAAAAGCAGCCGACACC
novelMiR_1164	-7.63	1	chrII+12866798~12866895	GAAUCGAUGGACGGCGUGACGU
novelMiR_1165	-6.77	1	chrII+12878361~12878458	UCUGGAUACGCUGAUUGG
novelMiR_1167	-0.04	5	chrII+12896463~12896593	CCAGGACGGAGAUGAGGCUCUUC
novelMiR_1168	-4.51	3	chrII+12899178~12899275	GGAAAUUUGCCGAUUUGCCGGA
novelMiR_117	-8.23	1	chrI+1498411~1498508	AUCGCCGAUCGCCGAUUGC
novelMiR_1170	-3.05	7	chrII+12905349~12905446	CAAAUUGUCGACUUGCCGUUUGC
novelMiR_1171	-3.23	2	chrII+12917996~12918093	AUCUCGCGGUCCAUCGACUUUA
novelMiR_1172	-6.07	1	chrII+12948406~12948503	UCCAUCGAGGCGUCGGCUGCAAG
novelMiR_1173	-4.68	1	chrII+12948351~12948448	UCCAUCGAGGCGUCGGCUGCAAG
novelMiR_1174	-6.32	1	chrII+12979062~12979159	AAGCCUACCCCAUGCCUACCUGC
novelMiR_1175	-4.92	1	chrII+12996569~12996666	CCCGGAAAGUGUCGGCUGCA
novelMiR_1176	-2.51	4	chrII+13016836~13016933	UACCUAUCGGCUUUAAAUGUAC
novelMiR_1177	-6.43	1	chrII+13027826~13027923	AUUGCCGGAGUUGAAAAUUUC
novelMiR_1178	-6.43	1	chrII+13028135~13028232	AUUGCCGGAGUUGAAAAUUUC
novelMiR_1179	0.34	3	chrII+13037755~13037838	CAAUUCGUCGAUUUGCCGGAAAU
novelMiR_118	-3.65	1	chrI+1501859~1501956	UUGCCAGUUUGCCGGAAAUU
novelMiR_1180	-6.08	1	chrII+13052729~13052826	CGAUUUGCCGAAUUUGUCGACA
novelMiR_1181	-8.25	1	chrII+13065101~13065198	AGUUUAUGAAGAAGGGGGG
novelMiR_1182	-4.18	2	chrII+13076995~13077092	GCCAACGUCGCUGAUUGG
novelMiR_1183	-8.27	1	chrII+13092821~13092918	GUCCUUGCGUAGACUCCCCCAUA
novelMiR_1184	-8.78	1	chrII+13135447~13135544	GCAUCUUCAAGCUUUGGAAUG
novelMiR_1185	-3.33	8	chrII+13148786~13148883	AAUUGCCGAUUUGCCGAAUUUGC
novelMiR_1186	-6.42	1	chrII+13166335~13166432	GUUUGCCGGAUAUCAGAUUUGC
novelMiR_1187	-5.79	1	chrII+13174900~13174997	UCGGGCAAAUUCUGCAAAUUGGC
novelMiR_1188	-1.92	1	chrII+13190052~13190153	UAAGGUAUUUAAAAGUCGAUGGA
novelMiR_1189	-3.65	1	chrII+13262522~13262619	CGCUGGUGUCGAUUUACGGAAA
novelMiR_119	-3.68	1	chrI+1502235~1502332	UUGCCAGUUUGCCGGAAAUU
novelMiR_1190	-5.1	1	chrII+13306786~13306883	AGAAAAUCUAGGUUUAGCCCAUC
novelMiR_1191	-4.64	1	chrII+13325069~13325166	ACCCGUCGGUGUCAAAGCUUCA
novelMiR_1192	-3.41	1	chrII+13326902~13326999	ACAGAAUUUCUGAAGAGUUUU
novelMiR_1193	-8.45	1	chrII+13330451~13330548	GCUGCUGUAUAGGACCCAC
novelMiR_1195	-5.55	1	chrII+13382499~13382596	AACUGUGUCGUCGGCGGCC
novelMiR_1196	-4.84	2	chrII+13383445~13383542	ACUCCAUCGACGACUGCUGA
novelMiR_1197	-8.5	1	chrII+13384219~13384316	AAAUUGACUGAGCCAUGGC
novelMiR_1198	-8.92	1	chrII+13388508~13388605	CCACAGCACCACCAAAGCCCU
novelMiR_120	-3.35	2	chrI+1516122~1516219	CGUCCAUCGACUUUAAAAUACC
novelMiR_1200	-2.75	2	chrII+13395078~13395161	UUCCAGCAAUUUGCCGAUUUGCC
novelMiR_1201	-6.44	2	chrII+13397942~13398039	CGGCAACUUGCCGAUUUGCCGGA
novelMiR_1203	-5.6	6	chrII+13398030~13398127	CAAUUUGCUGAUUUGCCGGAAAU
novelMiR_1204	-5.38	1	chrII+13413173~13413270	UGCUCGUAAAAUAUGGUG
novelMiR_1205	-8.59	1	chrII+13413113~13413210	UGCUCGUAAAAUAUGGUG
novelMiR_1206	-3.82	1	chrII+13413472~13413543	AUGCACCAGAUUUGACGCGCAAA
novelMiR_1207	-6.24	1	chrII+13413591~13413664	CAAUACACCAGAUUUGACGCGCA
novelMiR_1208	-6.87	1	chrII+13418455~13418552	UUUUACCCCAACAAUCGGCAAUA
novelMiR_1209	-5.05	1	chrII+13419045~13419142	CAAGUCGGAGCUCUCGUCUGGG
novelMiR_121	-4.54	1	chrI+1526556~1526653	CAAUAGACGGGAAAUAAUGUA
novelMiR_1210	-7.04	1	chrII+13422948~13423045	CAAUUUGCCGAUUUGCCGGAAU
novelMiR_1211	-5.97	1	chrII+13422892~13422989	CAAUUUGCCGAUUUGCCGGAAU
novelMiR_1212	-5.26	1	chrII+13423018~13423129	CAAUUUGCCGAUUUGCCGGAAU
novelMiR_1213	-7.04	1	chrII+13423368~13423465	CAAUUUGCCGAUUUGCCGGAAU
novelMiR_1214	-5.97	1	chrII+13423312~13423409	CAAUUUGCCGAUUUGCCGGAAU
novelMiR_1215	-5.26	1	chrII+13423438~13423549	CAAUUUGCCGAUUUGCCGGAAU
novelMiR_1216	-5.98	1	chrII+13423732~13423829	CAAUUUGCCGAUUUGCCGGAAU
novelMiR_1217	-7.29	1	chrII+13434512~13434609	CAAUUUGCCAAUUUGCCGGAAAU
novelMiR_1218	-6.21	1	chrII+13434886~13434983	AACAUUUCCGGCAAACCG
novelMiR_1219	-8.67	1	chrII+13449799~13449896	AGGCUAUGCGUCGUAGGCGUGA
novelMiR_122	-8.04	1	chrI+1532811~1532908	GGCAAAUCGGCAAAUUGUCGGA
novelMiR_1220	-3.37	1	chrII+13492321~13492418	UUGUGUAAAUCUGCUGGAAACC
novelMiR_1221	-7.05	1	chrII+13511458~13511555	CUUAGGCUCAGGCUCACGCU
novelMiR_1222	-5.5	1	chrII+13511400~13511497	CUUAGGCUCAGGCUCACGCU
novelMiR_1223	7.2	16	chrII+13515599~13515696	UGGGCAAGACUUUGGCAAAACU
novelMiR_1224	-2.95	3	chrII+13558938~13559035	CAUUUAAAGCCGAUAGGUAACC
novelMiR_1225	-8.52	1	chrII+13594183~13594280	CCGUCAGAAGGUGCCCAUCGG
novelMiR_1226	-4.01	1	chrII+13598737~13598834	UCUGAUCCUUCGGAGCUGAAGGA
novelMiR_1227	-5.87	1	chrII+13598686~13598783	UCUGAUCCUUCGGAGCUGAAGGA
novelMiR_1228	-4.01	1	chrII+13599007~13599104	UCUGAUCCUUCGGAGCUGAAGGA
novelMiR_1229	-5.87	1	chrII+13598956~13599053	UCUGAUCCUUCGGAGCUGAAGGA
novelMiR_123	-2.03	3	chrI+1536675~1536772	CGUCCAUCGACUUUAAAAUACC
novelMiR_1230	-4.78	1	chrII+13599106~13599203	UCGGAGCUGAAGGAUCAG
novelMiR_1231	-6.76	1	chrII+13599046~13599143	UCGGAGCUGAAGGAUCAG
novelMiR_1232	-4.78	1	chrII+13599286~13599383	UCGGAGCUGAAGGAUCAG
novelMiR_1233	-3.91	1	chrII+13599727~13599824	UCUGAUCCUUCGGAGCUGAAGGA
novelMiR_1234	-5.87	1	chrII+13599676~13599773	UCUGAUCCUUCGGAGCUGAAGGA
novelMiR_1235	-6.4	1	chrII+13634361~13634458	UUGGAAAAUUGCCGGAAUUGAAA
novelMiR_1236	-6.85	2	chrII+13642053~13642150	CGGCAACUUGCCGAUUUGCCGGA
novelMiR_1237	-3.16	1	chrII+13650043~13650140	UAGGCUUAGGCUUAGGUUUAGGC
novelMiR_1238	-5.97	1	chrII+13665928~13666025	AACCCUAGGGUACUGUAGAGCU
novelMiR_124	-8.07	1	chrI+1550553~1550636	GAUGAGAUUGGAGCACUGCC
novelMiR_1240	-8.9	1	chrII+13693442~13693539	GUGGAUCCUCGUAUUGAGCGC
novelMiR_1241	-7.45	1	chrII+13719092~13719189	CAAACUGUCGAUUUGCCGGAAA
novelMiR_1243	2.07	44	chrII+13741527~13741624	UUGGCUGAAAAGUGGGCGGUGCU
novelMiR_1244	-4.83	1	chrII+13764282~13764379	UGUCCCAUUUCAGUUUGAUCU
novelMiR_1245	-2.86	2	chrII+13827096~13827193	UGUGUCCCCGCAGUGUCUCCGCC
novelMiR_1247	-7.3	1	chrII+13829199~13829296	AGGACGACCCUUGGGAAGUC
novelMiR_1249	-4.62	3	chrII+13910917~13911014	GGAAAUUUGCCGAUUUGCCGGA
novelMiR_125	-7.74	1	chrI+1551436~1551533	AUCGGCAGUUUUGGCAGUU
novelMiR_1250	-7.81	1	chrII+13934004~13934101	CCCGGUAGACGUCGGACCAUGC
novelMiR_1251	-7.66	1	chrII+13947876~13947973	AAGGUGGCAAAAGGGUGGGAGAA
novelMiR_1253	-7.86	1	chrII+13979355~13979452	CAAUUUGUCGAUUUGCCGGAAAA
novelMiR_1254	-3.32	1	chrII+13984812~13984909	ACAGACGAAAAAUAGAUUGA
novelMiR_1255	-5.68	2	chrII+14001186~14001283	UGCCCACCGUUGAGUCGCCUGC
novelMiR_1256	-8.42	1	chrII+14007960~14008057	AUGUCAGAGCAGUUGUUGAAG
novelMiR_1257	-7.25	4	chrII+14011670~14011767	GUGGAUUGUGUGGUUGAUG
novelMiR_1258	-9	1	chrII+14019630~14019727	GUGGGCGGUAGCGGGCGGUAGC
novelMiR_1259	-5.85	1	chrII+14019577~14019674	GUGGGCGGUAGCGGGCGGUAGC
novelMiR_126	-7.95	1	chrI+1551377~1551474	AUCGGCAGUUUUGGCAGUU
novelMiR_1260	-8.15	7	chrII+14043702~14043799	CAAUUUGCCUAUUUGUCGGAAAU
novelMiR_1261	-8.01	1	chrII+14044285~14044382	GUGAUGACAGACGACUAGACAC
novelMiR_1262	-6.8	1	chrII+14049384~14049481	AUUUCGAAAUUUGCCGCACACG
novelMiR_1265	-6.26	2	chrII+14079192~14079289	CGGCAACUUGCCGAUUUGCCGGA
novelMiR_1266	-6.07	2	chrII+14079137~14079234	CGGCAACUUGCCGAUUUGCCGGA
novelMiR_1267	-6.77	1	chrII+14079992~14080089	CUGCUGUGGCCUGGGUUCGGA
novelMiR_1268	-7.53	1	chrII+14084492~14084589	GAUUGGUUGGCCACGCCU
novelMiR_1269	-5.76	1	chrII+14090047~14090144	CCAACAGUGGUCGGGGUAUC
novelMiR_127	2.98	3	chrI+1571495~1571589	CGUCCAUCGACUUUAAAAUACC
novelMiR_1270	-4.35	1	chrII+14137072~14137169	AAUUGGCGGAAUUGAAAUUUC
novelMiR_1271	-7.36	1	chrII+14159343~14159440	GGAGGAAGAGGAGGUCGUGGU
novelMiR_1272	-7.31	1	chrII+14183082~14183179	CAACAAGUGUUCCACCUCCGAUC
novelMiR_1274	-7.67	1	chrII+14190656~14190753	UGCCGGUUUUGUGAAUUU
novelMiR_1275	-3.69	1	chrII+14219757~14219854	AGAGCGUGUGGAGAAGAGAGA
novelMiR_1276	-4.52	1	chrII+14248145~14248242	UUCGCUUCGUUGUUCGCAAGGC
novelMiR_1277	-8.18	1	chrII+14272311~14272408	CAAAAUUUAAGGUAAAAACGGCU
novelMiR_1278	-6.4	1	chrII+14274336~14274433	CAAUUCGCCGAUUUGCUGGAAAU
novelMiR_1279	-8.01	1	chrII+14274281~14274378	CAAUUCGCCGAUUUGCUGGAAAU
novelMiR_128	-2.84	2	chrI+1572889~1572986	UUACCAAUUCGGCUUUAAAUGU
novelMiR_1280	-8.33	1	chrII+14278853~14278950	CAAUUUGCCGAUUUGCCGGACAU
novelMiR_1281	-7.37	1	chrII+14278798~14278895	CAAUUUGCCGAUUUGCCGGACAU
novelMiR_1282	0.34	9	chrII+14279513~14279610	UUACCUAUCGGCUUUAAAUGU
novelMiR_1283	-4.77	1	chrII+14282761~14282858	AAUUGAGAUGCUUUUUCGGUC
novelMiR_1284	-6.24	1	chrII+14302779~14302876	UUGCGCGUCAAAUAUGGUG
novelMiR_1285	-6.24	1	chrII+14307012~14307109	UUGCGCGUCAAAUAUGGUG
novelMiR_1286	-3.65	1	chrII+14313834~14313931	CGCUGGUGUCGAUUUACGGAAA
novelMiR_1287	-7.71	1	chrII+14322120~14322217	UUUGUGUUCCCAUAAUAUACUG
novelMiR_1288	-8.28	1	chrII+14362642~14362739	AAGCAGGCGAUGGAUCCG
novelMiR_129	2.28	19	chrI+1576180~1576310	ACAUUUAUGGUCAGUGGGGCACA
novelMiR_1290	-7.89	1	chrII+14374636~14374733	UAGGCUUAGGCUUAGGUUUAGGC
novelMiR_1291	-6.72	1	chrII+14374581~14374678	UAGGCUUAGGCUUAGGUUUAGGC
novelMiR_1292	-3.86	1	chrII+14399481~14399578	UCUCUCUUCUCCACACGCUCUCU
novelMiR_1293	-6.39	1	chrII+14412934~14413031	UUCCAGGCAUACGACGGAGUC
novelMiR_1294	-6.79	1	chrII+14444085~14444182	CCCGAGCACCGCUGGACCG
novelMiR_1295	-7.63	2	chrII+14487158~14487255	GCAUGGGGAAUUGGACGGAUUU
novelMiR_1299	-7.5	1	chrII+14501353~14501450	GGUGUACCAGGAGUCGGACC
novelMiR_13	-4.75	3	chrI+336347~336444	UUUCACCCAACUCUUGCCAAAC
novelMiR_130	0.53	5	chrI+1578256~1578353	AUCUCACCGUCCAUCGACUUU
novelMiR_1301	-5.47	1	chrII+14620397~14620494	AUAGAGUUGCCAGAUGUCGGAC
novelMiR_1302	-6.78	1	chrII+14627925~14628022	CUUCUUCCGGAAAUGUCGCUG
novelMiR_1303	-8.2	3	chrII+14635298~14635395	GCCUUAGACCGCUCGGCC
novelMiR_1304	-6.54	1	chrII+14665157~14665254	UAUCUUUUCGUCGCUGCUACCGC
novelMiR_1306	-8.24	1	chrII+14732935~14733032	UGCCGAUUCGCCGGAAAUU
novelMiR_1307	-8.03	1	chrII+14760436~14760533	GCCGAAAGAUCGAGCGUCGA
novelMiR_1308	-6.8	1	chrII+14760636~14760741	AUGGAGCGAUGCUUUGCCGAGG
novelMiR_1309	2.35	93	chrII+14773319~14773451	CCGCGCGCCGCUAUGUUUAACU
novelMiR_131	-5.36	1	chrI+1579642~1579739	AGUUUUGCGUUGGGUCCC
novelMiR_1311	-5.36	1	chrII+14774326~14774395	AUUUCAUGCGGACUGUGCU
novelMiR_1312	-7.08	2	chrII+14790240~14790337	UGACCCGUGAGGUGCUGGCCGCU
novelMiR_1313	-7.4	1	chrII+14790349~14790446	ACCUUGGAUGUGUCGGCUGCU
novelMiR_1314	-3.36	67	chrII+14804395~14804489	GACCACCGGUCCGGAGUUUGU
novelMiR_1315	-3.07	1	chrII+14811229~14811326	ACGAAAUGGUCCCGCCACGC
novelMiR_1316	-5.95	6	chrII+14871331~14871428	CAAUUUGCUGAUUUGCCGGAAAU
novelMiR_1317	-7.44	1	chrII+14871494~14871591	GAAAUUGCCGAUUUGCCGGAAAU
novelMiR_1318	-6.63	1	chrII+14875189~14875286	GGCAAAUUGCCGAUUUGUCGGA
novelMiR_1319	-1.74	4	chrII+14876372~14876471	CAAUUCUCUUCGUCCAUCGACU
novelMiR_132	-8.13	1	chrI+1610801~1610898	UGGGAGCUCGAUGGAAGG
novelMiR_1320	-7.17	2	chrII+14907559~14907656	UCGAGGGUCGAUGGUUGGGU
novelMiR_1322	-5.47	1	chrII+14972173~14972270	CGGUGGAUCCGUCGAGCUGCUCU
novelMiR_1323	-7.38	1	chrII+15003334~15003431	GGAGGAUCUGGUGGGCUCAGGC
novelMiR_1325	-5.87	1	chrII+15008190~15008287	CAGGGUUUUUGGUUCCACGGAUU
novelMiR_1326	-5.2	1	chrII+15033440~15033537	UACAGGCGUAAAAAUGAAAAAGU
novelMiR_1327	-8.01	1	chrII+15044252~15044349	CCGUCAGAAGGUGCCCAUCGG
novelMiR_1328	2.06	46	chrII+15045486~15045583	UUACCUAUCGGCUUUAAAUGUA
novelMiR_1329	-8.88	2	chrII+15048182~15048279	CGGCAACUUGCCGAUUUGCCGGA
novelMiR_133	-3.78	1	chrI+1631305~1631402	CAAAAAUGAAUGAAACUGGUU
novelMiR_1330	-5.34	1	chrII+15058667~15058764	UCCGUUCUCUGAAGCCACCACCU
novelMiR_1331	-6.36	1	chrII+15060911~15061008	AACGAGGAGGUCGAAGAGCGG
novelMiR_1332	-5.95	1	chrII+15071842~15071939	GAAAUUGCCGAUUUGCCGGAAAU
novelMiR_1333	-7.17	4	chrII+15105786~15105883	CUCUAAUUUUGCCCCUGAUGCCC
novelMiR_1334	2.08	46	chrII+15112840~15112937	UUACCUAUCGGCUUUAAAUGUA
novelMiR_1335	-5.32	3	chrII+15123431~15123528	GGAAAUUUGCCGAUUUGCCGGA
novelMiR_1336	-4.84	2	chrII+15123561~15123670	CAAAUUUGCCGAUUUGCCGGA
novelMiR_1337	-5.22	2	chrII+15123807~15123910	CAAAUUUGCCGAUUUGCCGGA
novelMiR_1338	-3.54	1	chrII+15143007~15143104	CCAAACUCGGGAAUUGCCGGCCG
novelMiR_1339	-6.88	1	chrII+15165882~15165979	UUCGCCUCUUCCAUGCACUUGCA
novelMiR_134	-5.56	2	chrI+1632591~1632688	ACCCAGGUCGCUAGGUCG
novelMiR_1340	-6.52	1	chrII+15167549~15167646	UUUGGUUGUGGUUUUUGGUUUUG
novelMiR_1341	-7.93	2	chrII+15174004~15174101	CAAAUUUGCCGAUUUGCCGGA
novelMiR_1342	-6.62	2	chrII+15188911~15189008	CGGCAACUUGCCGAUUUGCCGGA
novelMiR_1343	-6.31	1	chrII+15205096~15205193	AUGCACCAGAUUUGACGCGCAAA
novelMiR_1344	-6.46	1	chrII+15209810~15209907	UAAGGUAUUUAAAAGUCGAUGGA
novelMiR_1345	-3.21	1	chrII+15209812~15209909	CUUCGUCCAUCGACUUUUAAAUA
novelMiR_1346	-5.77	2	chrII+15219854~15219951	CAAUUCGCCAAUUUGCCGGAAAU
novelMiR_1347	-7.29	1	chrII+15219958~15220055	CAAUUUGCCAAUUUGCCGGAAAU
novelMiR_1348	25.78	46	chrII+15222348~15222431	UUACCUAUCGGCUUUAAAUGUA
novelMiR_1349	-4.82	1	chrII+15228714~15228811	AAAAUGUCUGAAAAUGCCGAAA
novelMiR_135	-8.13	1	chrI+1694662~1694759	GUUUCGGCCAUAUUUUGAGCACU
novelMiR_1350	-8.74	1	chrII+15235620~15235717	GAAUAUGCUCGUCUCUGUGGCU
novelMiR_1351	-3.43	2	chrII+15238294~15238391	CGUUGAUUUAGGCCACAAUUUG
novelMiR_1352	-7.81	1	chrII+15240832~15240929	CAAACUGUCGAUUUGCCGGAAA
novelMiR_1353	-4.75	1	chrII+15240776~15240873	CAAACUGUCGAUUUGCCGGAAA
novelMiR_1354	-4.49	1	chrII+15254933~15255030	UAGGCUUAGGCUUAGGUUUAGGC
novelMiR_1355	-6.44	1	chrII+15254878~15254975	UAGGCUUAGGCUUAGGUUUAGGC
novelMiR_1356	-8.07	1	chrII+15268354~15268451	UUACAGUAUGGUGCUGUGUGGCU
novelMiR_1357	8.85	12	chrIII+9567~9648	AGUGUGUGGGGUGAGGCGAGACG
novelMiR_1358	-3.81	1	chrIII+15115~15212	AGGCGAGAGAGUGUGGUGUGG
novelMiR_1359	-5.62	1	chrIII+47041~47138	UGGGGUGAGGGGAGACGCA
novelMiR_1360	-3.41	1	chrIII+79417~79514	AUUUAGCAGACCAAAGUUGGGU
novelMiR_1361	-7.15	1	chrIII+82524~82621	UUUUGGGGUACUGUAGUCGGU
novelMiR_1362	-5.68	2	chrIII+122244~122341	UGCCCACCGUUGAGUCGCCUGC
novelMiR_1363	-6.99	3	chrIII+135817~135914	CGAGAUAUGGCCUCUGAAGCA
novelMiR_1364	-2.41	2	chrIII+151129~151226	GUGGCGAAACUCGGAAAUUGU
novelMiR_1365	-7.04	1	chrIII+162759~162856	AUUUCGAAAUUUGCCGCACACG
novelMiR_1366	-5.31	2	chrIII+191296~191393	UAGCAUACCCAACUUUGGUCUG
novelMiR_1367	-7.23	2	chrIII+191240~191337	UAGCAUACCCAACUUUGGUCUG
novelMiR_1368	-7.81	1	chrIII+195637~195734	UUGCGCGUCAAAUAUGGUG
novelMiR_1369	-6.73	1	chrIII+196315~196412	UUGCGCGUCAAAUAUGGUG
novelMiR_137	-8.9	1	chrI+1702235~1702332	CUAAACCGCCUUGCGAUGAUCUU
novelMiR_1370	-4.76	1	chrIII+196589~196686	UUGCGCGUCAAAUAUGGUG
novelMiR_1371	-2.96	2	chrIII+222678~222775	UGCGUCUCUCCCCCUCCCACA
novelMiR_1372	-5.37	2	chrIII+225051~225148	UGCGUCUCUCCCCCUCCCACA
novelMiR_1373	-5.86	1	chrIII+232970~233067	CGUUCACGGACCGGGAACGGCU
novelMiR_1374	-4.36	1	chrIII+272650~272747	GCCGGAAUUUUUUAAUUUUG
novelMiR_1375	-3.55	1	chrIII+273368~273465	GCCGGAAUUUUUUAAUUUUG
novelMiR_1376	-5.8	2	chrIII+295163~295260	UCAAACCGAAAUGGGACACUCU
novelMiR_1377	-0.64	26	chrIII+334133~334230	AUACCCAACUUUGGUCUGCUAAA
novelMiR_1378	-2.83	26	chrIII+334082~334179	AUACCCAACUUUGGUCUGCUAAA
novelMiR_1379	-0.78	26	chrIII+334288~334385	AUACCCAACUUUGGUCUGCUAAA
novelMiR_138	-7.53	1	chrI+1703411~1703508	CUGGUUGUGAAAUGGUUUGAAUU
novelMiR_1380	0.65	26	chrIII+334237~334334	AUACCCAACUUUGGUCUGCUAAA
novelMiR_1381	-0.59	26	chrIII+334381~334478	AUACCCAACUUUGGUCUGCUAAA
novelMiR_1382	-3.83	1	chrIII+337496~337593	AUUUAGCAGACCAAAGUUGGGU
novelMiR_1383	-3.43	1	chrIII+337558~337655	AUUUAGCAGACCAAAGUUGGGU
novelMiR_1384	-4.43	1	chrIII+340900~340997	AUUUAGCAGACCAAAGUUGGGU
novelMiR_1385	-3.8	1	chrIII+341049~341146	AUUUAGCAGACCAAAGUUGGGU
novelMiR_1386	-4.42	1	chrIII+340993~341090	AUUUAGCAGACCAAAGUUGGGU
novelMiR_1387	-4.25	1	chrIII+341055~341152	AUUUAGCAGACCAAAGUUGGGU
novelMiR_1388	-6.75	1	chrIII+346626~346723	AUUUAGCAGACCAAAGUUGGGU
novelMiR_1389	-2.34	6	chrIII+354682~354757	AUAGUGGGAUGUGAGACAGCAGA
novelMiR_139	-2.65	5	chrI+1729334~1729431	UUGGCAAGAGUUGUGUGAAACU
novelMiR_1390	-6.33	1	chrIII+354796~354893	AGAGCGGAGUAAGCGAUGGGC
novelMiR_1391	-0.85	1	chrIII+358265~358346	GACGUCACAACUGUAUUAAAAU
novelMiR_1392	-7.41	1	chrIII+380097~380204	UUCGGAUAUUUUCUAAUAAUGA
novelMiR_1393	-7.35	1	chrIII+407569~407666	AUCGGUGAAAAACACAAGAAAAC
novelMiR_1394	-4.5	1	chrIII+413710~413807	CUGAAAUUUGUCGGGGACUCG
novelMiR_1395	-2.09	5	chrIII+421552~421649	UGCCUAUCGGCCUAAAAGUUGUC
novelMiR_1396	-5.3	4	chrIII+432424~432521	GAUCUACAAAAAAUGCGGCAGA
novelMiR_1397	-8.25	1	chrIII+446304~446401	AAUUGCCGACUUGCCGAGCUCGG
novelMiR_1398	-6.92	1	chrIII+470514~470611	AUUUAGCAGACCAAAGUUGGGU
novelMiR_1399	-5.92	1	chrIII+470628~470725	AUUUAGCAGACCAAAGUUGGGU
novelMiR_14	-4.84	4	chrI+337047~337144	UACGUUUUCCGGAUCUGGCACCG
novelMiR_140	-8.07	1	chrI+1729378~1729475	UAUUUUUGGGCCAAACUUGGGC
novelMiR_1400	-3.97	1	chrIII+470572~470669	AUUUAGCAGACCAAAGUUGGGU
novelMiR_1401	0.39	26	chrIII+474234~474331	AUACCCAACUUUGGUCUGCUAAA
novelMiR_1402	-2.46	26	chrIII+474183~474280	AUACCCAACUUUGGUCUGCUAAA
novelMiR_1403	-6.15	3	chrIII+478949~479046	AUCGGCUAAUUCGGCUAACUCGG
novelMiR_1404	-9.05	1	chrIII+482172~482269	UGUUUGUGAUCUCGAUUUUUU
novelMiR_1405	-3.62	1	chrIII+492837~492934	AUUUAGCAGACCAAAGUUGGGU
novelMiR_1406	-3.63	1	chrIII+493386~493483	AUUUAGCAGACCAAAGUUGGGU
novelMiR_1407	-4.37	2	chrIII+498475~498572	UAGCAUACCCAACUUUGGUCUG
novelMiR_1408	15.19	26	chrIII+498758~498835	AUACCCAACUUUGGUCUGCUAAA
novelMiR_1409	15.19	26	chrIII+498944~499021	AUACCCAACUUUGGUCUGCUAAA
novelMiR_141	0.25	8	chrI+1733593~1733690	UUUGGCAAGAGUUGGGUGAAA
novelMiR_1410	-5.33	1	chrIII+501900~501997	GUGGAUUGGAGGCCGCCGAGA
novelMiR_1411	-8.81	1	chrIII+557110~557207	GCAGCACUAAUAGAGAAUAUACG
novelMiR_1413	-5.97	2	chrIII+585152~585249	UAGCAUACCCAACUUUGGUCUG
novelMiR_1414	-7.22	1	chrIII+592924~593021	AUCGGUGAAAAACACAAGAAAAC
novelMiR_1415	3.9	3	chrIII+594504~594598	CAUUUAAAGCCGAUAGGUAACC
novelMiR_1416	-1.31	6	chrIII+601700~601797	UACAUUUUCGGCCAGUGGGGC
novelMiR_1417	-0.37	12	chrIII+611157~611254	AUCGGCGACUCGGCAAAUUGCC
novelMiR_1418	-8.13	2	chrIII+624425~624522	UUAACCAAGAUUUGGGCUGGGC
novelMiR_1419	-4.16	2	chrIII+653044~653141	CUCAGUUUUUCCUCCAACCA
novelMiR_142	-3.65	8	chrI+1733540~1733637	UUUGGCAAGAGUUGGGUGAAA
novelMiR_1420	-4.61	4	chrIII+657799~657896	UUCGGAGUCGCUGAUUGGUGC
novelMiR_1421	5.58	6	chrIII+671318~671410	GACGUCGUCGUCCGUGUUUUCU
novelMiR_1422	-8.43	8	chrIII+692275~692372	UACGGGACCAUGAGAUCAUGAGA
novelMiR_1423	-5.27	1	chrIII+738793~738890	AGAGUAUAGACAGGGGCU
novelMiR_1424	-9.07	1	chrIII+741790~741887	UCCCAGGACGUAGAGGCU
novelMiR_1425	-4.6	4	chrIII+748456~748553	UUAUUGCCGAAACUGCCGAUUGC
novelMiR_1426	-4.18	1	chrIII+757405~757502	CAAAUCAGGGGUGGGCGGA
novelMiR_1427	-4.82	1	chrIII+855738~855835	AUUUAGCAGACCAAAGUUGGGU
novelMiR_1428	-6.27	6	chrIII+910731~910828	UACGUCACAACUGUAUUCAAGU
novelMiR_1429	-4.37	1	chrIII+923095~923192	GCAGCACUAAUAGAGAAUAUACG
novelMiR_143	-7.28	3	chrI+1735213~1735310	AUGGAGGUUCGUCAGGCAGC
novelMiR_1430	-3.83	1	chrIII+931709~931806	AUUCUGGAAUGUUCUAGAACCU
novelMiR_1431	-7.27	1	chrIII+938423~938520	ACACGUGGCGUCAGGCUGUCU
novelMiR_1432	-1.01	7	chrIII+947321~947418	UUUAGUGGGGCGCGUUUGCAUC
novelMiR_1433	-7.49	1	chrIII+986657~986754	CUUUUGGGGCUACAGUACCC
novelMiR_1434	-7	1	chrIII+986968~987065	CUUUUGGGGCUACAGUACCC
novelMiR_1435	-8.29	2	chrIII+1006783~1006880	CGAGGACGGGGAGGGAAGGG
novelMiR_1436	-7.35	1	chrIII+1022765~1022862	AUCGGUGAAAAACACAAGAAAAC
novelMiR_1437	-7.9	1	chrIII+1026559~1026656	AGGAUUAGGCUCAGGCUUAGGC
novelMiR_1438	-4.54	1	chrIII+1039826~1039923	UCGGGCUGAAAAUUUCAAAUUU
novelMiR_1439	-4.78	1	chrIII+1063337~1063434	UAAAUCGAUCGACAAGUGCUCG
novelMiR_1440	-6.08	1	chrIII+1081653~1081750	GCUCGGAACUCCUCUGUCCACU
novelMiR_1441	-8.81	1	chrIII+1088412~1088509	GAAGUUUGAGCGUGUCGCAUCGG
novelMiR_1442	-0.83	16	chrIII+1101571~1101668	UGGGCAAGACUUUGGCAAAACU
novelMiR_1443	-4.29	1	chrIII+1202933~1203030	GUGCCGAGGAGACGUUUGGGC
novelMiR_1444	-3.18	1	chrIII+1221721~1221818	CGUCUCCCCUCGCCGCACACUC
novelMiR_1445	-1.94	5	chrIII+1249697~1249794	UCUCCCCUCCACCACGCUCUUU
novelMiR_1446	-1.61	9	chrIII+1250041~1250138	UCUACCCUCCACCACGCUCUCU
novelMiR_1447	3.65	6	chrIII+1250398~1250479	UCUCCCCUCCACCACGCUCUUU
novelMiR_1448	0.08	9	chrIII+1254573~1254670	AUUCCCGCGAUUAUUGUAGAUC
novelMiR_1449	-4.44	1	chrIII+1255163~1255260	AAUUGGCGGAAUUGAAAUUUC
novelMiR_145	-7.56	1	chrI+1736115~1736212	CACCUCGAGCGCUUCGGAG
novelMiR_1450	3.65	6	chrIII+1258758~1258839	UCUCCCCUCCACCACGCUCUUU
novelMiR_1451	0.08	9	chrIII+1263014~1263111	AUUCCCGCGAUUAUUGUAGAUC
novelMiR_1452	-4.44	1	chrIII+1263604~1263701	AAUUGGCGGAAUUGAAAUUUC
novelMiR_1453	-3.53	1	chrIII+1283650~1283747	CGCUUUUUGGGCCAAUGGGGACG
novelMiR_1454	-1.91	3	chrIII+1307615~1307712	UGCGUCUCUCCUCCUCCCACACU
novelMiR_1455	-8.08	1	chrIII+1327175~1327272	CUGUAGUGGUACUGUAGGG
novelMiR_1458	-6.2	1	chrIII+1404207~1404304	ACCGAUUAGCCGAAUUAGCCG
novelMiR_1459	-6.86	1	chrIII+1409606~1409703	GAAUACAGACGUCGUCGAGCCCU
novelMiR_146	-6.78	1	chrI+1736654~1736751	GAGGAUCUCGCUGAUGCU
novelMiR_1460	-4.18	1	chrIII+1421561~1421658	UUCUGAAAAGAUCGGCUCCGG
novelMiR_1461	-6.32	2	chrIII+1447934~1448031	UAUUGGAUCUUCGAAAAUUAGU
novelMiR_1462	-6.06	2	chrIII+1481172~1481280	GUUUGUCAGACGAAGUUCGAAC
novelMiR_1465	-6.76	2	chrIII+1505653~1505750	CGGAGAUGCGGAAGCUAU
novelMiR_1466	-6.88	1	chrIII+1540354~1540451	UUUUCCUCUGAAAAUCCGUGG
novelMiR_1467	-7.19	1	chrIII+1550854~1550951	GCCACGCGGGGUACUGUAGCA
novelMiR_1468	-6.5	2	chrIII+1566289~1566386	CGGAGAUGCGGAAGCUAU
novelMiR_147	-4.52	1	chrI+1749047~1749144	UCACCUAUCGGCUUUAAAUGU
novelMiR_1470	-6.5	2	chrIII+1569618~1569715	CGGAGAUGCGGAAGCUAU
novelMiR_1471	-7.6	1	chrIII+1571523~1571620	CAGGUAAAAAAGCUGGAUUCCU
novelMiR_1472	-6.76	2	chrIII+1574085~1574182	CGGAGAUGCGGAAGCUAU
novelMiR_1473	-6.7	1	chrIII+1577751~1577848	UGGAUAUGCAGAGCUCCGCCG
novelMiR_1474	-5.92	1	chrIII+1613373~1613470	GAUUAUCGCCGGCGGUGG
novelMiR_1475	-7.65	1	chrIII+1613313~1613410	GAUUAUCGCCGGCGGUGG
novelMiR_1478	-7.77	1	chrIII+1648265~1648362	CAAUUUGACGAUUUGCCGGUAAU
novelMiR_1479	-5.86	1	chrIII+1707204~1707301	CGUUCACGGACCGGGAACGGCU
novelMiR_148	-7.2	1	chrI+1776671~1776768	UAAUUGAGACGCUUUUUCGGUC
novelMiR_1480	-3.89	1	chrIII+1732779~1732876	UUUUCGCUUCGAGACCUGAAU
novelMiR_1481	-4.67	1	chrIII+1758750~1758847	UCGACCCUUGUGCCUGUUUUUGG
novelMiR_1482	-8.07	1	chrIII+1774978~1775075	GGCGGGGAGUGAUGAUUGUAGAU
novelMiR_1483	-4.67	1	chrIII+1784464~1784561	CGCUAUGUUUAACUCGCAG
novelMiR_1484	-6.76	2	chrIII+1833003~1833100	CGGAGAUGCGGAAGCUAU
novelMiR_1485	-7.24	2	chrIII+1872747~1872844	CGGAGAUGCGGAAGCUAU
novelMiR_1486	-3.08	1	chrIII+1905747~1905844	UUAUUUCGGAGUGUCGUUGUGA
novelMiR_1487	-5.97	558	chrIII+1917321~1917418	UCCGAUCUGGCAAGUUAAGCAAC
novelMiR_1488	-5.51	558	chrIII+1917267~1917364	UCCGAUCUGGCAAGUUAAGCAAC
novelMiR_1489	-5.47	2	chrIII+1925265~1925362	ACACACACACACACACGCCU
novelMiR_149	-7.78	1	chrI+1798209~1798306	UCCGGCAAAUCAGCAAACC
novelMiR_1490	-8.87	1	chrIII+1925472~1925569	CAGGAGAUUGAUGGGGAA
novelMiR_1491	-7.2	1	chrIII+1965651~1965748	AAUUAUCGAUUUUUCCGGAAAG
novelMiR_1492	-8.37	1	chrIII+1965595~1965692	AAUUAUCGAUUUUUCCGGAAAG
novelMiR_1493	-4.84	1	chrIII+1965793~1965890	AAUUAUCGAUUUUUCCGGAAAG
novelMiR_1494	-5.2	1	chrIII+1990046~1990143	CUCUUACCGACUGCGCCA
novelMiR_1496	-7.17	1	chrIII+2067349~2067446	CAAUUUGCCGAUUUGCCGGAAU
novelMiR_1497	-7.79	1	chrIII+2067293~2067390	CAAUUUGCCGAUUUGCCGGAAU
novelMiR_1498	-8.69	1	chrIII+2098154~2098251	AAGGAGCUCAGAGUUAACCU
novelMiR_1499	-5.51	1	chrIII+2099149~2099246	GACGGAACCUAGGCAUGU
novelMiR_15	-5.95	1	chrI+360061~360158	CGGAGCAAAUCGCUGAUUGGUC
novelMiR_1500	-8.12	1	chrIII+2109031~2109128	AUGGGUCCCGCCACGAGAA
novelMiR_1501	-6.07	4	chrIII+2158526~2158623	UCAAAAAUGCGGGAAUUUCGGU
novelMiR_1502	-6.76	2	chrIII+2178153~2178250	CGGAGAUGCGGAAGCUAU
novelMiR_1503	-6.76	2	chrIII+2187765~2187862	CGGAGAUGCGGAAGCUAU
novelMiR_1504	-6.83	1	chrIII+2299616~2299713	AAAUCGGCAAGUCGGCACUUUGC
novelMiR_1505	2.06	12	chrIII+2324860~2324957	UCCGCCCACUUUUGAACCAAUC
novelMiR_1506	-6.76	2	chrIII+2344815~2344912	CGGAGAUGCGGAAGCUAU
novelMiR_1508	-6.67	2	chrIII+2355147~2355244	CGGAGAUGCGGAAGCUAU
novelMiR_1509	-7.21	2	chrIII+2358380~2358477	CGGAGAUGCGGAAGCUAU
novelMiR_1510	-2.73	14	chrIII+2363365~2363462	CAAAUUGUCGAUUUGCCGGAAA
novelMiR_1511	-6.76	2	chrIII+2377885~2377982	CGGAGAUGCGGAAGCUAU
novelMiR_1512	-6.76	2	chrIII+2378978~2379075	CGGAGAUGCGGAAGCUAU
novelMiR_1513	-7.13	1	chrIII+2424927~2425024	UCUCCCGCCUACAAAAUGAUC
novelMiR_1514	-2.68	3	chrIII+2457075~2457149	AUGUAUAGUGCGGCGCGGAACC
novelMiR_1515	-3.69	1	chrIII+2508485~2508582	GCCUGAAAGUUGCCGUUUGCC
novelMiR_1516	-8.47	1	chrIII+2545998~2546095	CAAUUUGCUGAUUUGCCGGAAA
novelMiR_1517	-4.02	1	chrIII+2562676~2562773	CUUAGGCUUAGGCUCAGUCU
novelMiR_1518	-8.36	1	chrIII+2563265~2563362	GUCGGGAACUGUGAGCUCCAUCU
novelMiR_1519	-7.4	1	chrIII+2616018~2616115	GGCAAAUCGGCAAAUUGUCGGA
novelMiR_152	-4.04	1	chrI+1861891~1861988	UCUCUCUUCUCCACACGCUCUCU
novelMiR_1520	-3.62	1	chrIII+2615962~2616059	GGCAAAUCGGCAAAUUGUCGGA
novelMiR_1521	-7.17	1	chrIII+2618900~2618997	GUUCCAUCGGAAGCCGGC
novelMiR_1522	-6.88	1	chrIII+2622495~2622592	UCCGCGAAAAUCUGCAAUUAUCC
novelMiR_1523	-8.71	3	chrIII+2628341~2628416	GGAAAUUUGCCGAUUUGCCGGA
novelMiR_1524	-4.49	1	chrIII+2636366~2636463	UGUAGGGUUGGUUGUCGUCGCG
novelMiR_1525	-6.08	2	chrIII+2652376~2652473	UUUCGGCAAAUCGGCAAAGUGC
novelMiR_1526	-7.71	1	chrIII+2664511~2664608	GUUUGCUGAUUUGCCGGAA
novelMiR_1527	-7.23	1	chrIII+2670797~2670894	UACGUGUCUCGUGGCAGGCUC
novelMiR_1528	-1.66	2	chrIII+2674143~2674240	UGAACGUCGCCUGGGAGCC
novelMiR_1529	-8.44	2	chrIII+2679198~2679281	ACGAUCCUUGUCGGCUUCUGCU
novelMiR_153	-8.53	1	chrI+1863391~1863488	UACUGUAGCGCGCUUGUGUCGA
novelMiR_1530	-6.76	1	chrIII+2679612~2679709	UCGUCCGGGACCAUCGACUCC
novelMiR_1531	-8.59	1	chrIII+2679555~2679652	UCGUCCGGGACCAUCGACUCC
novelMiR_1532	-6.7	1	chrIII+2681794~2681891	UUGCGCGUCAAAUAUGGUG
novelMiR_1533	-2.62	5	chrIII+2685192~2685289	UUUGCGCGUCAAAUAUGGGG
novelMiR_1534	-4.8	1	chrIII+2685289~2685386	UUGCGCGUCAAAUAUGGUG
novelMiR_1535	-4.57	2	chrIII+2691856~2691953	AUCUCACCGUCCAUCGACUUU
novelMiR_1536	-9.03	1	chrIII+2708919~2709016	CGUUCUUGACGGGUCGUC
novelMiR_1537	-3.43	1	chrIII+2717147~2717244	CGAAAACUACAGUAAGAGCU
novelMiR_1538	-4.08	1	chrIII+2738975~2739072	CCUCUGAUACACCAUGUUUUACG
novelMiR_1539	-8.69	1	chrIII+2744234~2744331	UUUAAUGGCUUAUAUCUCGGAUA
novelMiR_1540	-5.65	2	chrIII+2801059~2801156	CGGCAACUUGCCGAUUUGCCGGA
novelMiR_1541	-3.13	1	chrIII+2809634~2809731	UGUGUCGAUUUACGAGCUCGAU
novelMiR_1542	-4.76	2	chrIII+2812488~2812585	GUUGGGGCUCGAUGAACAUU
novelMiR_1544	-6.76	2	chrIII+2828092~2828189	CGGAGAUGCGGAAGCUAU
novelMiR_1545	-3.42	1	chrIII+2864171~2864268	UCCGCCCACUUUUCAACCAAUCA
novelMiR_1546	-0.49	377	chrIII+2864815~2864912	CAGCGAUUCGAACUCCGCCCACU
novelMiR_1547	-2.4	2	chrIII+2866719~2866816	UGCGUCUCUCCCCCUCCCACA
novelMiR_1548	-3.49	2	chrIII+2870025~2870122	UGCGUCUCUCCCCCUCCCACA
novelMiR_1549	-2.81	2	chrIII+2871530~2871627	UGCGUCUCUCCCCCUCCCACA
novelMiR_1550	-2.56	2	chrIII+2890338~2890435	UGCGUCUCUCCCCCUCCCACA
novelMiR_1551	1.09	16	chrIII+2916986~2917083	UGGGCAAGACUUUGGCAAAACU
novelMiR_1552	-5.88	1	chrIII+2932589~2932686	CCAGUUGGAGUGGAUCGGCGC
novelMiR_1553	-8.56	1	chrIII+2958317~2958414	CGUGGAGGACGUGGUGGCC
novelMiR_1554	-5.99	2	chrIII+2973399~2973496	UGCGUCUCUCCCCCUCCCACA
novelMiR_1555	-8.81	1	chrIII+2980956~2981053	AUUCUUUCGACCAAGUCGUG
novelMiR_1556	-3.74	1	chrIII+2989141~2989238	CGUCUCUCCCCCUCCCACACU
novelMiR_1557	-6.02	1	chrIII+2992741~2992838	UUCUCGUGAGAUCUGGUGUCUGC
novelMiR_1558	-7.22	1	chrIII+3004404~3004501	AUCGGUGAAAAACACAAGAAAAC
novelMiR_1559	-3.26	1	chrIII+3006433~3006530	UGUCGAUUUACGGGCUCGAUAUU
novelMiR_156	-8.77	1	chrI+1899607~1899704	CUGACUCUAAUUUUGCCC
novelMiR_1560	-4.37	1	chrIII+3031140~3031237	UGAUUGGUUCAAAAGUGGGCGG
novelMiR_1561	-3.36	1	chrIII+3051457~3051554	UAGUUUUCGUGGCGGGACCCA
novelMiR_1562	-3.53	1	chrIII+3067504~3067616	ACUCACGCGAGCGACGGG
novelMiR_1564	-6.68	1	chrIII+3113454~3113551	UAGUUUUCGUGGCGGGACCCA
novelMiR_1565	-3.63	1	chrIII+3128299~3128396	UGGAGGGAGGGGAGACGCAGGCA
novelMiR_1566	-3.91	1	chrIII+3165172~3165269	UGCGUCUCUCCCCCUCCCACA
novelMiR_1567	-6.32	1	chrIII+3177461~3177558	GUGUAGAUUUACGGAGCCU
novelMiR_1568	-4.97	1	chrIII+3177402~3177499	GUGUAGAUUUACGGAGCCU
novelMiR_1569	-8.88	2	chrIII+3177888~3177985	AUCAAAUUCGUGAGCUCGCCGAG
novelMiR_157	-3.57	1	chrI+1912426~1912514	UUCGCAAGCCUCGCACGUUUUU
novelMiR_1570	-3.37	1	chrIII+3207426~3207523	UGCGUCUCUCCCCCUCCCACA
novelMiR_1571	-7.35	1	chrIII+3211277~3211374	AUCGGUGAAAAACACAAGAAAAC
novelMiR_1572	-6.83	1	chrIII+3218397~3218494	GGGCCCCGGCGCGAAAACU
novelMiR_1573	-2.52	2	chrIII+3237538~3237635	UGCGUCUCUCCCCCUCCCACA
novelMiR_1574	-4.54	1	chrIII+3257885~3257982	CCCGCGAUUCUCGUAGAUC
novelMiR_1575	-0.46	3	chrIII+3272236~3272363	CCCGGCAUUGGUCUCGCCACGC
novelMiR_1576	-9.05	1	chrIII+3308494~3308591	UUGAGUCCCGCCACGAAAU
novelMiR_1577	-7.58	1	chrIII+3316668~3316765	ACGGGAGGAUUUUAGGCUGA
novelMiR_1578	-6.17	2	chrIII+3317362~3317459	CGACGCGUCGGCGAGCUCCGGCC
novelMiR_158	-3.83	2	chrI+1912870~1912967	AUCUCGCCGUCCAUCAACUUU
novelMiR_1581	-7.31	1	chrIII+3329616~3329713	CCGCCGAGUCGAUUCAACG
novelMiR_1582	-6.86	2	chrIII+3378760~3378857	UUUUGUAGAAUUCGGCGUCCGAU
novelMiR_1583	-4.36	1	chrIII+3381381~3381478	GCCGGCAUCUCAUUGGUUG
novelMiR_1584	-8.86	1	chrIII+3384732~3384829	CGGAAAAUUGCCGAUUUGCCGGA
novelMiR_1586	-6.97	1	chrIII+3412189~3412286	CUGACUCUAAUUUUGCCC
novelMiR_1587	-0.87	2	chrIII+3433707~3433804	GUGGCGAAACUCGGAAAUUGU
novelMiR_1589	-5.55	1	chrIII+3451821~3451918	GCGGAGCACUGUAGCGUCC
novelMiR_1590	-3.92	1	chrIII+3467179~3467276	CGGAGCAAAUCGCUGAUUGGUC
novelMiR_1591	-7.64	1	chrIII+3472739~3472836	GUGGAUUCGGAUCCUUCCCAGA
novelMiR_1592	-6.73	1	chrIII+3479133~3479230	CGAGUCGCUGAUUGGUCGGAGA
novelMiR_1593	-5.25	1	chrIII+3491633~3491730	GAAAAGAAAGAAGCUCGGCCAUU
novelMiR_1594	-6.62	3	chrIII+3532775~3532872	UUCCGGCAGGUCGGCAAUUCGGC
novelMiR_1595	-1.58	5	chrIII+3635045~3635130	CAUUGGCUGGAGAGUGGGCGGA
novelMiR_1596	-7.47	6	chrIII+3686664~3686761	UACGUCACAACUGUAUUCAAGU
novelMiR_1597	-5.81	1	chrIII+3693394~3693491	GCAGCACUAAUAGAGAAUAUACG
novelMiR_1598	-4.02	1	chrIII+3717619~3717716	CACAUGGGUCUCGGCACGCUGA
novelMiR_1599	-4.16	11	chrIII+3738431~3738528	CUUGAAUACAGUUGUGACGUAAU
novelMiR_160	-3.81	1	chrI+1917372~1917469	UCGUUGAUUUAAGUACAUUUAUG
novelMiR_1600	-5.4	1	chrIII+3739271~3739368	AUCGGGAUUCUGACGGACGCUGU
novelMiR_1601	-7.74	1	chrIII+3786759~3786856	UCUCUCUCUUUCUCUCUCUCUCU
novelMiR_1603	-5.16	1	chrIII+3801556~3801653	AAGAGAAGAGAGGGAAUG
novelMiR_1604	-5.71	1	chrIII+3844451~3844548	GAAAAAACGUGCGAGGCU
novelMiR_1605	-7.37	1	chrIII+3844932~3845033	CCACCUUGUUUGAUUUUGACGGC
novelMiR_1607	-4.44	2	chrIII+3865093~3865179	ACUUGCCGCUCGUGUUGUCGAC
novelMiR_1609	-6.9	1	chrIII+3880139~3880236	AAAUGAAAUGCGGCGACACUUCG
novelMiR_161	-7.97	2	chrI+1920144~1920241	CAAUUUGUCGAUUUGCCGGAAU
novelMiR_1610	-7.4	1	chrIII+3978033~3978130	CAGGUACGUAGGCAGGCUGGAGC
novelMiR_1612	-3.88	2	chrIII+4131227~4131324	CAGAGGACGAGGAGGACGACGAG
novelMiR_1613	-7.5	1	chrIII+4158896~4158993	UGCUGUGCGGCUCUCGGCUCU
novelMiR_1614	-6.31	2	chrIII+4188669~4188766	GAGGUGGGUGUGGUGGCGG
novelMiR_1615	-6.19	1	chrIII+4277516~4277613	UCAUAUCUUGGUUGUCUAAAGUU
novelMiR_1616	0.18	1	chrIII+4281103~4281192	UACUGCUGCCUCUGUCAAUCC
novelMiR_1617	-5.66	1	chrIII+4281298~4281395	UCGAACUGUGGCUUGAGAGGCGC
novelMiR_1618	-3.7	1	chrIII+4315060~4315157	GAAUAAUUGGAAAAGUGCUCUCA
novelMiR_1619	-6.17	1	chrIII+4358465~4358562	AAGCUGGGGCGUUGAGUGGGAG
novelMiR_162	-7.8	2	chrI+1920623~1920720	CAAUUUGUCGAUUUGCCGGAAU
novelMiR_1620	-3.31	1	chrIII+4360487~4360584	AUGCAAAUGUGCUCUUUCGACA
novelMiR_1621	-6.82	5	chrIII+4381111~4381208	CACGUCACGACUGUAUUCAAGU
novelMiR_1622	-8.54	2	chrIII+4414946~4415043	CGGAGUGAUUGGAGGAGGU
novelMiR_1623	-4.82	2	chrIII+4489345~4489442	UGCAUUCCUUGUUGCAUCGGCC
novelMiR_1625	-8.53	1	chrIII+4534542~4534639	AUUCCAUUCUCGUUCUGCACAAU
novelMiR_1626	-8.53	1	chrIII+4568989~4569078	GCAACGUCCUCGGUCAUACA
novelMiR_1627	-5.93	2	chrIII+4569249~4569346	UGAAGAUCUUGCUGAGGCU
novelMiR_1628	-6.47	4	chrIII+4612430~4612527	UUUGGCAGCUUUAUCUCUGAGUU
novelMiR_1629	-1.05	13	chrIII+4615983~4616080	UAACAGGGAUGAAGUAACGCC
novelMiR_163	-7.13	1	chrI+1926602~1926699	AUUGCCGGAUUUGAAAUUUUC
novelMiR_1630	-2.81	3	chrIII+4662989~4663086	UUAUGGUAGGCAGGCACG
novelMiR_1631	-5.05	1	chrIII+4722040~4722137	AGUUGGGGGGAGUAGGAGGCGA
novelMiR_1632	6.08	1	chrIII+4785271~4785388	CCGCACACUUUUUUCGCAAGCC
novelMiR_1633	-3.7	2	chrIII+4947997~4948094	UUUCACUGCGAGACCCAUCCGA
novelMiR_1634	-6.85	1	chrIII+5024871~5024944	GCCGGACUCGACUCGAAAGAC
novelMiR_1636	-3.36	240	chrIII+5084777~5084874	UUUAAAACCGUGCGGCAGUUGC
novelMiR_1637	-4.16	2	chrIII+5107481~5107609	CGGAGGAUACGGUGGAUAUGG
novelMiR_1638	-7.43	1	chrIII+5166247~5166344	UGCGUGAAGCGAGGCGUCGUUC
novelMiR_1639	-4.12	1	chrIII+5169172~5169269	GCAGCACUAAUAGAGAAUAUACG
novelMiR_164	-6.54	1	chrI+1929017~1929114	AUUGCCGGAUUUGAAAUUUUC
novelMiR_1640	-8.01	1	chrIII+5337683~5337780	UGACGGCCGAGGUAGAUG
novelMiR_1641	-7.74	1	chrIII+5416927~5417024	GGACUUGAGAAUCGGAUUACAGU
novelMiR_1642	-5.19	2	chrIII+5446911~5447008	GCGAGGCCUGGAUCACUAAUCU
novelMiR_1643	-6.47	1	chrIII+5450830~5450927	AUGAGGUUCUGCUUGUGCU
novelMiR_1644	-7.73	1	chrIII+5453176~5453273	UGCCACGUCGCAGAAGCU
novelMiR_1646	-7.82	1	chrIII+5465529~5465626	AAAGAUGCAUUCGGUCGCCGUC
novelMiR_1647	-4.74	1	chrIII+5465476~5465573	AAAGAUGCAUUCGGUCGCCGUC
novelMiR_165	-7.32	3	chrI+1931407~1931504	UUCGGCUUGAUCUACGUUGAUC
novelMiR_1650	-5.77	1	chrIII+5552847~5552944	UGCGUCUUCAUUGGGUUACUGUA
novelMiR_1651	-4.23	1	chrIII+5566714~5566811	AGGGAGUCGAAGACGGAGA
novelMiR_1652	-6.36	1	chrIII+5596250~5596347	GCACGGUUCCUUGGAUGCG
novelMiR_1654	-6.57	1	chrIII+5599590~5599687	UGGAGGUCCUCGAAGAGCUG
novelMiR_1655	-4.35	1	chrIII+5631183~5631280	UUGAGCAGCCGACAUCUCACUG
novelMiR_1656	-8.38	1	chrIII+5633644~5633726	GUGAGAUGCCCGGUUAUUCUG
novelMiR_1657	-3.79	1	chrIII+5675515~5675612	CGGAGCACUUCGAGUGGAGCC
novelMiR_1659	-6.27	1	chrIII+5682593~5682690	CAUGGAGAUGAAGGGCGUGGAGU
novelMiR_166	-7.27	1	chrI+1937213~1937310	CAAUUUGCCAAUUUGCCGGAAAU
novelMiR_1661	-7.23	1	chrIII+5713931~5714028	ACGGAGCGAAUCGAGGAGAUC
novelMiR_1662	-4.18	11	chrIII+5750536~5750633	CUUGAAUACAGUUGUGACGUAAU
novelMiR_1663	-5	1	chrIII+5776973~5777070	UGAUUGGUUCAAAAGUGGGCGG
novelMiR_1664	-5.99	2	chrIII+5783647~5783744	CCGUCUUGUCCUUUGUCGUCUGA
novelMiR_1665	-6.44	1	chrIII+5905194~5905291	GAGAUGGGGUCAAUCGAGAGAC
novelMiR_1666	-7.42	1	chrIII+5926611~5926708	UUCCACUGGCGAUCACUUUGAU
novelMiR_1667	-1.47	1	chrIII+5931311~5931395	UACUCUUUCUAGGAGGUUGUGAU
novelMiR_1668	0.68	1	chrIII+5943334~5943454	CUCGAGGAUGGCCGUACCCU
novelMiR_1669	-4.2	1	chrIII+5963006~5963103	AAGGGUACUGUAACUUCAAACU
novelMiR_167	-7.27	1	chrI+1937769~1937866	CAAUUUGCCAAUUUGCCGGAAAU
novelMiR_1671	-2.65	3	chrIII+6109679~6109776	CAUUUAAAGCCGAUAGGUAACC
novelMiR_1673	-7.05	1	chrIII+6194784~6194881	GCUCCUAUAGAAUGUAAUCUGAA
novelMiR_1674	-9.01	1	chrIII+6199621~6199718	GACCGAAUUGUUGCUAGAAAUCU
novelMiR_1675	-8.99	1	chrIII+6199998~6200095	GGAUAACGCCGAGGCCGCUGCU
novelMiR_1676	-7.43	1	chrIII+6301736~6301833	GAUUGGUUGGCCACGCCU
novelMiR_1677	-7.46	1	chrIII+6308004~6308094	AGUGGGCGGAACCUGAGAACAGA
novelMiR_1678	-7.15	1	chrIII+6340301~6340398	GCUUUGGCUCUGGUUCGCGAGU
novelMiR_168	-5.07	1	chrI+1938105~1938202	CAAUUUGCCAAUUUGCCGGAAAU
novelMiR_1680	-9.01	1	chrIII+6421776~6421873	UUCAGCUGAUAUCUUGCUAUGA
novelMiR_1681	-7.23	1	chrIII+6422345~6422442	UCUCAGGUCUUGCAGUACU
novelMiR_1682	-7.82	1	chrIII+6503681~6503778	GGUGCUCCUACCUGCUCAGCC
novelMiR_1684	-7.84	1	chrIII+6573355~6573452	UUGGGUAGAGAGUUGCUGGGG
novelMiR_1685	-7.84	1	chrIII+6573733~6573830	UUGGGUAGAGAGUUGCUGGGG
novelMiR_1686	-7.84	1	chrIII+6574112~6574209	UUGGGUAGAGAGUUGCUGGGG
novelMiR_1687	-7.84	1	chrIII+6574988~6575085	GUUUUGGGCAGCAGACGAGCUU
novelMiR_1688	-4.97	1	chrIII+6592211~6592308	UUACAGUACUCUUUAAAGGCACA
novelMiR_1689	-6.95	1	chrIII+6606246~6606343	AAUGUCUGCGUCUCUCUGUAACU
novelMiR_169	-7.21	1	chrI+1950013~1950110	UGACAAAUUGCCGAUUUGCCGGA
novelMiR_1690	-4.87	1	chrIII+6606191~6606288	AAUGUCUGCGUCUCUCUGUAACU
novelMiR_1692	1.2	4	chrIII+6626038~6626154	UCCAAUAUGGUCGAAAUCUAAUC
novelMiR_1693	-1.24	1	chrIII+6632480~6632577	GAAAAAACGUGCGAGGCU
novelMiR_1694	-5.91	1	chrIII+6647142~6647239	GAGAGGGUAGUGAUCGGCU
novelMiR_1695	-5.98	1	chrIII+6648524~6648621	GUGUCAUUAGCGGAUGUUAG
novelMiR_1697	-5.36	2	chrIII+6754405~6754502	ACGACGGAGUUGAGGGACC
novelMiR_1698	-7.25	1	chrIII+6758488~6758585	UCUGGAGCUGUUAUCGGGCCU
novelMiR_1699	-6.4	1	chrIII+6764801~6764898	UCUGGCGCUGUUAUUGGACC
novelMiR_17	-7	2	chrI+379497~379594	GCUGCAUGUAGUUCGUCGCCU
novelMiR_1700	-8.51	1	chrIII+6766063~6766160	CCCGACGGACAAGUAUUACCAAC
novelMiR_1701	-4.95	2	chrIII+6769475~6769572	ACUCUGGAGCAGUGAUUGGACC
novelMiR_1702	-7.88	1	chrIII+6770777~6770863	CAUGGACCAGAUGGAACUCC
novelMiR_1704	-6.34	1	chrIII+6780589~6780674	CGUGGACCAGACGGCACUCCA
novelMiR_1706	-6.71	1	chrIII+6788713~6788810	UAUAUAUCCGGUCCGUGGUCCC
novelMiR_1707	-7.65	1	chrIII+6842488~6842585	UCAGCUCCGAUCGUUCUA
novelMiR_1709	-8.99	1	chrIII+6899867~6899964	UACGGUACCAGGUCUCGGC
novelMiR_171	-3.33	2	chrI+1954338~1954435	CCCGUAAAUCGACACAAGAGC
novelMiR_1710	-0.67	12	chrIII+6951544~6951641	UUGGCCUGACCCGCUCGCACC
novelMiR_1712	3.24	5	chrIII+6968803~6968880	UUGGCGGACUCUUCACAGUUUGA
novelMiR_1713	-7.84	1	chrIII+6970733~6970823	GUUCCGAUUCCUCCGAUCUUGU
novelMiR_1714	-4.22	27	chrIII+6985296~6985381	UCGAGAAAUGACGAGAAAUUCAC
novelMiR_1715	-4.64	1	chrIII+7155803~7155900	CUCUAGCCGUUUCUCUGCGUCU
novelMiR_1716	-4.98	1	chrIII+7180711~7180808	CGCGUCGUUUUCAGAACUG
novelMiR_1717	-0.95	1	chrIII+7186292~7186401	GACACCAUUGGUUUCUUGUCGUC
novelMiR_1718	-8.32	1	chrIII+7220382~7220479	GGAAUGUCUCGUCCUGGAG
novelMiR_1721	-5.01	1	chrIII+7252166~7252263	UGAAAAUUGAAAUUUGCCGAGA
novelMiR_1723	-6.75	4	chrIII+7335438~7335535	GAGGAGGAUGGAGAAGAAGGC
novelMiR_1724	-6.57	1	chrIII+7469529~7469626	CCGUUUCCGGUCCGUAGACG
novelMiR_1725	-8.18	1	chrIII+7496654~7496751	GAGUAACCGAUUUCCGUGAUUU
novelMiR_1726	-8.94	1	chrIII+7502928~7503025	CGUGACAGAGAUAGGAGCCGCC
novelMiR_1727	-5.36	1	chrIII+7513692~7513789	CACUAUGAUCUUCGGAGAGCU
novelMiR_1729	-6.98	1	chrIII+7632941~7633038	UUGAUGAGUGUGAGGAGAGCA
novelMiR_173	-4.39	1	chrI+2002613~2002710	UCUCCCGAAUUUUUCAUCUCUCG
novelMiR_1730	-8.67	1	chrIII+7711636~7711733	AAAAAAGCAUGCGGGGGUUAUGA
novelMiR_1731	-7.13	1	chrIII+7714696~7714793	GGUGCUCCUACCUGCUCAGCC
novelMiR_1732	-8.6	1	chrIII+7723292~7723389	ACCUGACUUCGCAAAUUCG
novelMiR_1733	-6.22	1	chrIII+7730601~7730698	UCUGUCGUUUCCUAGCACUCGC
novelMiR_1734	-5.49	1	chrIII+7732192~7732289	CCGGAAAGCGAUCAGUAC
novelMiR_1738	-8.98	1	chrIII+7982938~7983035	ACAGAUUCCUCGGCGUUGAUCC
novelMiR_1739	-8.05	2	chrIII+7997700~7997797	UUUCUCAAAAAAGUCGGGGGCCG
novelMiR_174	-6.09	3	chrI+2008826~2008923	UCUGCCGCAUUUUUUGUAGAUC
novelMiR_1740	13.67	7	chrIII+8021406~8021492	UUUUCGGGGUACGGUAUCUAAU
novelMiR_1742	-5.62	2	chrIII+8138775~8138864	UCGAGGUCGGACUUGACGUUCA
novelMiR_1743	-7.98	1	chrIII+8158453~8158550	ACGUGAUGGCCGAGAACUCGAG
novelMiR_1746	-8.84	1	chrIII+8236263~8236360	UUCUAUCUCGUGUUCCUUGGUG
novelMiR_1748	-8.31	1	chrIII+8353737~8353834	UUUCUCAGAACCAGCCAAAUCA
novelMiR_1749	-8.82	1	chrIII+8356900~8356983	CACAGCUACCAUUUUCUCGGUCC
novelMiR_1750	-7.26	1	chrIII+8379615~8379712	UUUGGUUACGGAGGAGACGAGUC
novelMiR_1751	-5.95	1	chrIII+8384328~8384425	AGGUUCGGCUGGUCUUUGGAGA
novelMiR_1752	-7.71	1	chrIII+8398723~8398820	GGAGGAUACGGUGGAUAUGGU
novelMiR_1753	-8.08	1	chrIII+8440419~8440516	UCGUUUCGAGACCGGGUACUGUA
novelMiR_1755	-4.76	1	chrIII+8495025~8495122	GGAGGAGCACCAUCGACGGC
novelMiR_1757	-7.3	1	chrIII+8570097~8570194	CCCGCCUACGUUGUUGCAU
novelMiR_1758	-8.38	1	chrIII+8576530~8576627	GAAGACUAGAAACAGCAGCCGG
novelMiR_1759	-5.22	2	chrIII+8581533~8581630	AAAUUGGUGUCGAGAUCGGGU
novelMiR_176	-8.78	1	chrI+2039258~2039355	AUAUCGUCAGUGGAUCUCGGC
novelMiR_1760	-6.77	1	chrIII+8606634~8606731	CACCUCGGGCUCCACGAC
novelMiR_1761	-5.97	2	chrIII+8638793~8638890	UGCGCCUUUGAAGAGUACUGUA
novelMiR_1762	-6.71	1	chrIII+8675949~8676046	GGGACUAGAACUGGGAAGAGUA
novelMiR_1764	-6.67	2	chrIII+8795465~8795562	UUUUGCUCAUCGAACACCGCGAG
novelMiR_1765	-8.65	1	chrIII+8859757~8859854	ACGUCGCUGAACUUGGAUGGG
novelMiR_1766	-0.88	5	chrIII+8873906~8874003	UGAUAUCGUCGUUGAAAGCCGCU
novelMiR_1767	-2.9	27	chrIII+8901259~8901344	UCGAGAAAUGACGAGAAAUUCAC
novelMiR_1768	-5.2	1	chrIII+8904152~8904249	UGUAGCGAGGUACGGUGGAGCGC
novelMiR_1769	-6.36	1	chrIII+8909003~8909100	GCACUUGGUAUCCUGGACAGG
novelMiR_177	-7.82	1	chrI+2052953~2053050	GUUCUUGGAUUGAGCUGGACCGA
novelMiR_1770	-8.07	1	chrIII+9059453~9059550	UUUCAGAUCUUCGGCCAGGUUC
novelMiR_1771	-6.24	1	chrIII+9225921~9226018	AUUGGAGCCAUCAGAAGACUGUU
novelMiR_1772	-7.27	1	chrIII+9265637~9265734	CGCCGAUUCGCGACUCGCCGAGC
novelMiR_1773	-8.21	1	chrIII+9353905~9354002	CGGCGGAGCAAGCAGGAAU
novelMiR_1774	2.41	103	chrIII+9408488~9408611	GUUUUUGCUGAUCUCUCUUCU
novelMiR_1775	-8.66	2	chrIII+9409526~9409623	CCGUCUUGUCCUUUGUCGUCUGA
novelMiR_1777	-6.71	1	chrIII+9482535~9482632	AAACGGACCGGUUUUUGGCGGC
novelMiR_1778	-6.63	2	chrIII+9533828~9533925	GGUGGGAUAUGGUCGGGGUAC
novelMiR_1779	-7.07	2	chrIII+9615353~9615450	GCAUGGGUGGAUAUAAGAGACG
novelMiR_178	-4.18	1	chrI+2075608~2075705	AAUUGAGAUGCUUUUUCGGUC
novelMiR_1780	-7.88	1	chrIII+9675412~9675509	AAGGUGGCAAAAGGGUGGGAGAA
novelMiR_1781	-7.31	1	chrIII+9680493~9680590	GCAAGACUAAUAGAGACU
novelMiR_1784	-7.23	2	chrIII+9767087~9767184	UAUGGGUCGAGUGCCGGGGCC
novelMiR_1785	-8.32	1	chrIII+9774472~9774562	UUUGAGUAGUCGUCCGAUGUC
novelMiR_1786	-3.28	3	chrIII+9792234~9792320	UACCUACCAAGUCGCUCUUUGAU
novelMiR_1788	-7	2	chrIII+9824162~9824259	UGUUUCGGAUGAGCUUGGCGA
novelMiR_1789	-8.64	1	chrIII+9905396~9905493	UCGGGACCACGCUGCUGAGCAA
novelMiR_179	55.81	69	chrI+2076510~2076597	GAUUUUUCGAUCAUUGGGGCAC
novelMiR_1790	-8.84	1	chrIII+9921253~9921350	GGGAGAUCAGUUGUGGAUGUC
novelMiR_1792	-8.75	1	chrIII+9924871~9924968	GGUUCGGCAACUUCGGCAAUUG
novelMiR_1793	-3.13	1	chrIII+9924815~9924912	GGUUCGGCAACUUCGGCAAUUG
novelMiR_1794	-6.56	1	chrIII+9925154~9925251	GGUUCGGCAACUUCGGCAAUUG
novelMiR_1795	-5.82	1	chrIII+9925098~9925195	GGUUCGGCAACUUCGGCAAUUG
novelMiR_1796	-2.15	5	chrIII+9968477~9968558	UUUUGAGCGCCGCGCCGUCGAGA
novelMiR_1797	-6.79	1	chrIII+9971806~9971903	GUAGGCGUAGACUUGGACU
novelMiR_1798	-8.45	1	chrIII+9971747~9971844	GUAGGCGUAGACUUGGACU
novelMiR_1799	-8.42	1	chrIII+10052774~10052871	CCGACUGCUUCCACUAUGUC
novelMiR_18	-5.88	2	chrI+379444~379541	GCUGCAUGUAGUUCGUCGCCU
novelMiR_1800	-8	1	chrIII+10107700~10107797	GUUUGCCGGAUAUCAGAUUUGC
novelMiR_1802	-8.78	1	chrIII+10144852~10144949	GCAUCUUCAAGCUUUGGAAUG
novelMiR_1803	-4.4	5	chrIII+10187872~10187969	CCAGCAGGAGAAGAAGAAGCAGA
novelMiR_1804	-3.33	1	chrIII+10220497~10220594	AUUAGAUUUGAGUUGCCUGAGUA
novelMiR_1805	-7.02	1	chrIII+10254861~10254958	CUUGCAACUGGACCACCGACUG
novelMiR_1806	-8.76	9	chrIII+10277026~10277123	UUACUGUAGUUUUCGCCACGAGA
novelMiR_1807	-7.69	1	chrIII+10309182~10309279	AUCGGAAGAUUUUCAGGAUUGCU
novelMiR_1808	-6.26	8	chrIII+10313984~10314081	UACGGUACCGGGUCUCGACACGA
novelMiR_1809	-3.41	3	chrIII+10320720~10320817	UUUUGUUCGUCUUCCCUCUUGGC
novelMiR_181	-3.8	1	chrI+2096510~2096607	UUACUGUAGUUUUCGCUGCGAG
novelMiR_1810	-7.09	6	chrIII+10361534~10361631	UACGUCACAACUGUAUUCAAGU
novelMiR_1811	-2.37	3	chrIII+10395668~10395765	UUCCCGUGAGGCGUCGGCUGCU
novelMiR_1812	-0.52	10	chrIII+10398961~10399058	AGAAGAGCAGCGGCAGAGAGCAC
novelMiR_1813	-4.86	1	chrIII+10406160~10406257	GAACUGAUCUCCGGGAGACUC
novelMiR_1815	-4.4	2	chrIII+10427504~10427601	GUGGGUCGGAGAUUGCUUCUUG
novelMiR_1816	-5.91	13	chrIII+10447677~10447774	UGGUGUCAGGCUGUCUCAUUGC
novelMiR_1817	-8.69	1	chrIII+10451295~10451392	GCAAGACUAAUAGAGACU
novelMiR_1818	-8.83	2	chrIII+10458895~10458979	GUGCAUGAGCUUGUCGAUGACU
novelMiR_1819	-5.25	1	chrIII+10461159~10461256	UGCGGCGCACUUGCAUAGGGC
novelMiR_182	-7.71	1	chrI+2097487~2097584	AUUUUAGGCGGUUCAGAAGGC
novelMiR_1821	-3.61	1	chrIII+10476202~10476299	UUAGGCGUAGGCGUAGGCUUAGG
novelMiR_1822	-4.71	1	chrIII+10476395~10476492	UUAGGCUUGGGCUUGGGC
novelMiR_1826	-7.28	1	chrIII+10554644~10554741	GCAAUCGGCGAUCGGCGAUCG
novelMiR_1827	-7.27	1	chrIII+10554718~10554815	AUAGAACUCGGCGAUCGGCGA
novelMiR_1828	-5.63	1	chrIII+10554661~10554758	AUAGAACUCGGCGAUCGGCGA
novelMiR_1829	-4.15	1	chrIII+10555021~10555118	UUGUGAUCGCCGAUCGCCGAAA
novelMiR_183	-3.77	1	chrI+2102749~2102846	UGCCGGUUUUGUGAAUUU
novelMiR_1830	-8.44	1	chrIII+10554965~10555062	UUGUGAUCGCCGAUCGCCGAAA
novelMiR_1831	2.4	17	chrIII+10568242~10568362	CUAAGAGAUAUCGCGCGUCAAA
novelMiR_1832	-8.58	1	chrIII+10588048~10588145	UACUGAGUCGAUUUUCAUAAGAU
novelMiR_1833	-7.96	1	chrIII+10652739~10652836	UACUGUAGCGCUUGUGCCGAUU
novelMiR_1834	-6.93	1	chrIII+10661713~10661810	UUUCAAUUCCGUCAAUUUGC
novelMiR_1836	-7.77	1	chrIII+10716553~10716650	CAAUUUGACGAUUUGCCGGUAAU
novelMiR_1837	-7.83	1	chrIII+10734867~10734964	AUUGGUUGAAAAGUGGGCGGCGC
novelMiR_1838	-8.93	1	chrIII+10748466~10748563	CUUCCAUCCUCGAACGAAACCGC
novelMiR_1839	-4.77	1	chrIII+10748748~10748845	CGACCGUACCACUCGUUUGGCC
novelMiR_184	-2.9	3	chrI+2103557~2103654	CAUUUAAAGCCGAUAGGUAACC
novelMiR_1840	-7.96	1	chrIII+10766118~10766215	GAAUGGAGAAGGAUCUGGCAGA
novelMiR_1842	-6.08	1	chrIII+10768054~10768151	UAAAUCGACACAAGCUCUACAGU
novelMiR_1843	-5.16	1	chrIII+10809625~10809722	CUGUGCGUUCUUCGAGAUUUACG
novelMiR_1844	-7.94	1	chrIII+10816995~10817092	UAUCUCUCGGCGGCUUCCCAGG
novelMiR_1845	-7.42	1	chrIII+10845148~10845245	GAUUGGUUGGCCACGCCU
novelMiR_1847	-3.7	1	chrIII+10906884~10906981	AACCAGGGGUGUUCGGCA
novelMiR_1848	-8.27	1	chrIII+10931623~10931720	AUGUUGGUGUGGCGAGGAU
novelMiR_1849	-7.22	2	chrIII+10951781~10951878	GUUCCCGUUAUCGAUUUUGGC
novelMiR_1850	-4.93	2	chrIII+11009797~11009894	CAGAAAAAGAGGCGGAGC
novelMiR_1852	-3.98	1	chrIII+11054084~11054181	GAAAAAUGGGCGGUGCAAAUC
novelMiR_1853	-4.39	1	chrIII+11115478~11115575	AGACGUAGAUCGUGGCGAGACCU
novelMiR_1854	-6.33	1	chrIII+11137367~11137464	CAAAUUGCCGGAAUUGAAAACC
novelMiR_1855	-7.73	1	chrIII+11148647~11148744	UUGUCGUGUCGAGACCCGG
novelMiR_1856	-4.25	1	chrIII+11152067~11152164	UUGGAAAAUUGCCGGAAUUGAAA
novelMiR_1857	-8.34	2	chrIII+11160217~11160314	GGUGGGAUAUGGUCGGGGUAC
novelMiR_1858	-6	1	chrIII+11169652~11169749	CCCUGGAGUCCUCGGAGCAACU
novelMiR_1859	26.37	46	chrIII+11177197~11177280	UUACCUAUCGGCUUUAAAUGUA
novelMiR_186	-8.14	1	chrI+2112414~2112511	UUGGUGGUACAGUCGGGGUACU
novelMiR_1861	-4.89	1	chrIII+11200412~11200509	UGCCAGUUUGCCGAUUUGCCGGA
novelMiR_1863	-7.15	6	chrIII+11226052~11226149	UACGUCACAACUGUAUUCAAGU
novelMiR_1864	-6.68	2	chrIII+11237103~11237200	UCCCGAACCCGGAUGGAGGACCG
novelMiR_1865	-8.13	1	chrIII+11286596~11286693	GUUGACGAUCGCCAUCGGAUGG
novelMiR_1866	2.22	16	chrIII+11307238~11307335	UCUCGCCGUCCAUCGACUUUAA
novelMiR_1867	-6.8	1	chrIII+11311686~11311783	CAAAUUGCAGAUUUGCCGGAAA
novelMiR_1868	-7.95	1	chrIII+11311630~11311727	CAAAUUGCAGAUUUGCCGGAAA
novelMiR_187	-6.88	1	chrI+2118972~2119069	GGCAAAUCGGCAAAUUGUCGGA
novelMiR_1870	-7.68	1	chrIII+11358572~11358669	UGAACAUUGAAAAUCCGGAAA
novelMiR_1871	-6.64	1	chrIII+11376457~11376554	GUGAGAUGUCGGGUGCAAUAAC
novelMiR_1872	-8.13	1	chrIII+11376806~11376903	GUGAGAUGUCGGGUGCAAUAAC
novelMiR_1873	-8.13	1	chrIII+11377155~11377252	GUGAGAUGUCGGGUGCAAUAAC
novelMiR_1874	-5.9	1	chrIII+11410726~11410823	UGCCGAUUCGCCGGAAAUU
novelMiR_1875	-8.43	1	chrIII+11419951~11420048	UUGGAUUUGCCACGUGGCCUGUC
novelMiR_1876	-6.99	2	chrIII+11422412~11422509	UGCAAUUUGCCGAUUUGCCGGA
novelMiR_1877	-4.13	2	chrIII+11422356~11422453	UGCAAUUUGCCGAUUUGCCGGA
novelMiR_1879	-7.58	1	chrIII+11443042~11443139	UUGCAUCCGACACCUCGCCGGC
novelMiR_1880	-6.99	1	chrIII+11443453~11443550	CCCGUGAGAUGUCGGCUGCAAGU
novelMiR_1881	-5.66	2	chrIII+11471168~11471265	CCCGAGAAGUGGUACCUG
novelMiR_1882	-2.74	2	chrIII+11490769~11490866	UGAUUGGUUGAAAAGUGGGCGGA
novelMiR_1883	-5.87	2	chrIII+11495717~11495814	UAAUUUGUCGAUUUGCCGGAAA
novelMiR_1884	-8.52	2	chrIII+11495662~11495759	UAAUUUGUCGAUUUGCCGGAAA
novelMiR_1885	-7.82	1	chrIII+11495958~11496055	CAAUUUGCUGACUUGCCGGAAAU
novelMiR_1886	-7.82	1	chrIII+11495903~11496000	CAAUUUGCUGACUUGCCGGAAAU
novelMiR_1887	26.22	46	chrIII+11498457~11498540	UUACCUAUCGGCUUUAAAUGUA
novelMiR_1888	-6.18	1	chrIII+11510607~11510704	GCUCGUUUCGUCUCCUCCGGCG
novelMiR_1889	-7.58	1	chrIII+11521216~11521313	GACAUUGCUUUUGUCGGGCA
novelMiR_189	-7.69	1	chrI+2139431~2139528	CAAAUUGUCGAUUUGCCGGAUA
novelMiR_1890	-3.67	1	chrIII+11531186~11531283	CAAAACUCGCCGUCCAUCGACU
novelMiR_1891	-8.22	1	chrIII+11551117~11551214	CAAUUCGCCGAUUUGCUGGAAAU
novelMiR_1892	-6.85	1	chrIII+11562977~11563074	CAAAUCGGUAGGCUGCCGGAAAU
novelMiR_1893	-6.37	1	chrIII+11562922~11563019	CAAAUCGGUAGGCUGCCGGAAAU
novelMiR_1894	-5.52	1	chrIII+11578077~11578174	AAACGAAACAACGAAGCUCCGA
novelMiR_1895	-3.38	2	chrIII+11578078~11578175	UUAUUUCGGAGCUUCGUUGUUUC
novelMiR_1897	-5.75	1	chrIII+11668710~11668807	ACGUGAGGCGGGCAGGUUUCA
novelMiR_1898	-3.79	1	chrIII+11675534~11675631	CCACUUCGCCGUUGAUGAUG
novelMiR_19	-5.41	1	chrI+379736~379833	UCAUCUCGAACUCCUGGCAUU
novelMiR_190	-2.82	1	chrI+2141872~2141969	GAAAAAACGUGCGAGGCU
novelMiR_1900	-7.13	1	chrIII+11687597~11687694	GAAAAAUUGCCGAUUUGCCGGA
novelMiR_1903	-6.68	1	chrIII+11688555~11688652	GGCAAAUCGGCAAAUUGUCGGA
novelMiR_1904	-8.71	1	chrIII+11689242~11689339	AGAAGAGUCGAACGAGAGGACGC
novelMiR_1905	-7.23	1	chrIII+11713180~11713277	GAAAAAUUGCCGAUUUGCCGGA
novelMiR_1906	-4.67	2	chrIII+11720076~11720173	UUGUCAACUAAUAAAAUGUAGA
novelMiR_1907	-7.84	1	chrIII+11722754~11722851	UCGAUUUGCACUCUGGAGGGUCA
novelMiR_1908	-8.73	1	chrIII+11737423~11737520	GGCGAGUGCGAUGUAGGACAU
novelMiR_1909	-5.73	1	chrIII+11738992~11739080	AAUCGGCAAAUCGGUAAACUGC
novelMiR_191	-3.96	1	chrI+2162743~2162840	ACGAAAUGGUCCCGCCACGC
novelMiR_1910	-6.85	2	chrIII+11751901~11751980	GUGGCGGAGUGUACACAUGGGU
novelMiR_1912	-7.97	1	chrIII+11762443~11762540	GCCCUUUUGCUCGGCUGGC
novelMiR_1913	-5.71	6	chrIII+11796867~11796943	CAAUUUGCUGAUUUGCCGGAAAU
novelMiR_1914	720.38	1033	chrIII+11829137~11829222	UGGGCGGAGCGAAUCGAUGAUU
novelMiR_1915	-8.88	1	chrIII+11858376~11858473	AACCGAAAUGAGACACUUUGACA
novelMiR_1916	-7.69	3	chrIII+11865326~11865423	GGAAAUUUGCCGAUUUGCCGGA
novelMiR_1917	-9.02	7	chrIII+11866568~11866665	UGAGAACUCUGCCGCAUUUUUUG
novelMiR_1918	-7.83	1	chrIII+11889746~11889843	UUAAAUGGCUACUGUAGA
novelMiR_1919	-7.95	7	chrIII+11889975~11890072	UGAGAACUCUGCCGCAUUUUUUG
novelMiR_192	-8.93	1	chrI+2171033~2171130	UGCCGGUUUUGUGAAUUU
novelMiR_1920	-7.71	1	chrIII+11890951~11891048	UUGCGCGUCAAAUAUGGUG
novelMiR_1921	-6.62	2	chrIII+11919268~11919365	GCUGAUCGGCGACCUCUUGAAGU
novelMiR_1924	-4.19	4	chrIII+11936547~11936644	AAGCGAAUCUGAGCCCAGGC
novelMiR_1925	-7.9	1	chrIII+11937073~11937170	CGGUACAGAGAGUGUAGA
novelMiR_1926	-4.35	23	chrIII+11937290~11937387	UCCGCGCGCAAGUUGUUCUGC
novelMiR_1927	-4.22	27	chrIII+11940174~11940259	UCGAGAAAUGACGAGAAAUUCAC
novelMiR_1928	7.14	10	chrIII+11946406~11946485	AGGACUACACUGCGCGGGGGACU
novelMiR_1929	-7.5	2	chrIII+11953823~11953920	CAAUUUGUCGAUUUGCCGGAAU
novelMiR_193	-2.34	3	chrI+2175589~2175686	CAUUUAAAGCCGAUAGGUAACC
novelMiR_1930	-1.05	5	chrIII+11954221~11954318	UCAGCAUCUUCGAACUCCGCCC
novelMiR_1931	-4.19	1	chrIII+11954626~11954723	UAAAUCGACACACAAGCGCUAC
novelMiR_1932	-7.06	1	chrIII+11961997~11962094	GCCGCGACGGAUACUCGAACG
novelMiR_1933	-8.56	1	chrIII+11961940~11962037	GCCGCGACGGAUACUCGAACG
novelMiR_1934	-7.79	1	chrIII+11979826~11979923	CAAUUUGCCAAUUUGCCGGAAAU
novelMiR_1936	-5.37	1	chrIII+12001009~12001106	GUCCGGGUUCAGGUAGAAGCCU
novelMiR_1939	-6.44	3	chrIII+12023895~12023992	UUCGGCAAAUCGGCAAAUCGGC
novelMiR_194	-3.55	1	chrI+2189900~2189997	CAUUUGAGGGCAACGGAUCACC
novelMiR_1940	-4.82	2	chrIII+12037358~12037455	GAGCGACGAGCACGAUCCCGGC
novelMiR_1941	-7.5	1	chrIII+12064364~12064461	CGGAGCAAAUCGCUGAUUGGUC
novelMiR_1942	-7.92	1	chrIII+12070019~12070116	UAAAUUGCCGAUUUGCCGGAAA
novelMiR_1943	-8.71	1	chrIII+12070097~12070194	UAAAUUGCCGAUUUGCCGGAAA
novelMiR_1944	-8.76	1	chrIII+12070407~12070504	UAAAUUGCCGAUUUGCCGGAAA
novelMiR_1945	-8.58	1	chrIII+12089287~12089384	GUUUGCUGAUUUGCCGGAA
novelMiR_1946	-8.76	1	chrIII+12089228~12089325	GUUUGCUGAUUUGCCGGAA
novelMiR_1948	-8.19	1	chrIII+12101060~12101157	UGGACAAUUUGGGCAAUUCCAGC
novelMiR_1949	2.04	8	chrIII+12120228~12120300	GGUUUGCCAAUUUGCCGGAAC
novelMiR_1950	-7.2	1	chrIII+12148402~12148499	UUUGCCGAUUUGCCGACCACCC
novelMiR_1951	-3.73	1	chrIII+12155071~12155168	UGAAAUUUCCAGCAAAUCGGCA
novelMiR_1952	-6.59	2	chrIII+12157886~12157983	CAGAAAAAGAGGCGGAGC
novelMiR_1953	2.45	16	chrIII+12163519~12163616	UCUCGCCGUCCAUCGACUUUAA
novelMiR_1954	-6.83	1	chrIII+12165780~12165877	GAAAUUGCCGAUUUGCCGGAAAU
novelMiR_1955	-5.88	6	chrIII+12166117~12166214	CAAUUUGCUGAUUUGCCGGAAAU
novelMiR_1956	-4.49	6	chrIII+12166062~12166159	CAAUUUGCUGAUUUGCCGGAAAU
novelMiR_1958	-7.56	3	chrIII+12166454~12166551	GGAAAUUUGCCGAUUUGCCGGA
novelMiR_1959	-7.88	1	chrIII+12167515~12167612	AUUUGACGAUUCGGGUGCCGGAU
novelMiR_196	-7.26	1	chrI+2207644~2207741	UGUGUCACCUGUGAGCCCGCC
novelMiR_1960	-4.64	2	chrIII+12168793~12168890	CGGCAACUUGCCGAUUUGCCGGA
novelMiR_1961	-6.78	2	chrIII+12168738~12168835	CGGCAACUUGCCGAUUUGCCGGA
novelMiR_1962	-3.61	2	chrIII+12239855~12239952	ACCCAGGUCGCUAGGUCG
novelMiR_1963	-2.56	3	chrIII+12247676~12247773	CAUUUAAAGCCGAUAGGUAACC
novelMiR_1964	-3.94	2	chrIII+12262502~12262599	CGUAAAUCGACACAAGCGCUACC
novelMiR_1965	-0.38	16	chrIII+12264323~12264420	UCUCGCCGUCCAUCGACUUUAA
novelMiR_1966	-7.5	1	chrIII+12338558~12338655	CAAUUUGCCAAUUUGCCGGAAAU
novelMiR_1967	-8.88	2	chrIII+12349513~12349610	UUCCAGCAAUUUGCCGAUUUGCC
novelMiR_1969	-5.31	1	chrIII+12353870~12353967	AGACUAUUAGAGGCUGCAAGACU
novelMiR_197	-6.76	1	chrI+2292061~2292158	CAAUUUGCCGAUUUGCCGGAAU
novelMiR_1970	-8.33	1	chrIII+12382863~12382960	UCUUGAUGCUGCGCUCGUGCC
novelMiR_1971	-1.69	5	chrIII+12407700~12407797	AUCCCGCAUUUUUGUAGAUCAAA
novelMiR_1972	-3.45	2	chrIII+12409052~12409149	CGGCAACUUGCCGAUUUGCCGGA
novelMiR_1973	-7.77	2	chrIII+12408997~12409094	CGGCAACUUGCCGAUUUGCCGGA
novelMiR_1974	-3.5	6	chrIII+12409160~12409257	CAAUUUGCUGAUUUGCCGGAAAU
novelMiR_1975	-3.84	6	chrIII+12409105~12409202	CAAUUUGCUGAUUUGCCGGAAAU
novelMiR_1976	-7.62	1	chrIII+12441210~12441307	CAAUUUGCCAAUUUGCCGGAAAU
novelMiR_1977	-7.28	1	chrIII+12441471~12441568	CAAUUUGCCAAUUUGCCGGAAAU
novelMiR_1978	-6.21	1	chrIII+12441732~12441829	CAAUUUGCCAAUUUGCCGGAAAU
novelMiR_1979	-8.62	1	chrIII+12448593~12448690	GUGAGCAUCCUUAGCCGACU
novelMiR_198	-7.7	2	chrI+2294226~2294323	GCCAUGGAGCGCGUCGAGGAG
novelMiR_1981	-1.29	5	chrIII+12460189~12460286	CCCGUAAAUCGACACAAGAGC
novelMiR_1982	2.12	46	chrIII+12460792~12460889	UUACCUAUCGGCUUUAAAUGUA
novelMiR_1983	-5.05	1	chrIII+12479869~12479966	GCACCGCCAACUUCUUCGGAU
novelMiR_1984	-8.93	1	chrIII+12494556~12494653	GACCAGACAUCGGAUCUCGUC
novelMiR_1985	-7.42	1	chrIII+12531327~12531424	CAAAUUGCCGGAAUUGAAC
novelMiR_1986	-5.64	1	chrIII+12533158~12533255	CAAUUUGCCGAUUUGCCGGAAU
novelMiR_1987	-2.82	1	chrIII+12535203~12535286	AACACAUACGCCGCCCAUUUGU
novelMiR_1988	-3.76	1	chrIII+12558560~12558657	AUCCUUUAAGUACGACUACUGUA
novelMiR_1989	-6.62	1	chrIII+12567529~12567626	UGCCGGUUUUGUGAAUUU
novelMiR_199	1.46	3	chrI+2297482~2297589	GUGGGGGCCGGUCUAUUAUACA
novelMiR_1990	1.21	46	chrIII+12571823~12571920	UUACCUAUCGGCUUUAAAUGUA
novelMiR_1991	-3.95	10	chrIII+12576299~12576396	AAAAAUGCGGCAGAGUUCUCAAC
novelMiR_1992	-4.38	7	chrIII+12577589~12577686	UGAGAACUCUGCCGCAUUUUUUG
novelMiR_1993	-7.83	1	chrIII+12584370~12584467	GCAAUUUGCCGACUUGCCGGAAA
novelMiR_1994	-8.38	1	chrIII+12597085~12597182	GACAUUUGGAUCGUUCUUGGCAU
novelMiR_1995	-3.27	1	chrIII+12603870~12603967	AAACGAAACAACGAAGCUCCGA
novelMiR_1996	-8.35	1	chrIII+12605981~12606078	GUCAAUGUGAGUGUGAUCUGA
novelMiR_1997	-3.94	1	chrIII+12612912~12613009	AUGAUCUACAAUAAAUGCGAGAA
novelMiR_1998	-8.08	1	chrIII+12614772~12614869	GCGUAGGCAGGCAAGGAC
novelMiR_1999	3.4	3	chrIII+12623032~12623114	CAUUUAAAGCCGAUAGGUAACC
novelMiR_2	-7.49	1	chrI+106034~106131	GAUUGGAGCCGUCCGUUGAGA
novelMiR_20	-8.82	2	chrI+379768~379865	GUGGAUGCUGUUGUGGAUGUCC
novelMiR_2000	1.04	46	chrIII+12632614~12632711	UUACCUAUCGGCUUUAAAUGUA
novelMiR_2001	-7.31	1	chrIII+12653360~12653457	UUACGGGCUCGAUUUUUAAAAU
novelMiR_2002	-5.61	1	chrIII+12672470~12672567	UACAGGCGUAAAAAUGAAAAAGU
novelMiR_2003	-8.01	1	chrIII+12684940~12685037	UUACUGUAGUUUUCGCUGCGAG
novelMiR_2004	-3.65	1	chrIII+12692820~12692917	UUGCCAGUUUGCCGGAAAUU
novelMiR_2005	-5.2	1	chrIII+12692762~12692859	UUGCCAGUUUGCCGGAAAUU
novelMiR_2006	-8.03	1	chrIII+12692867~12692964	UUGCCAGUUUGCCGGAAAUU
novelMiR_2007	25.38	45	chrIII+12701710~12701792	UUACCUAUCGGCUUUAAAUGUA
novelMiR_2008	5.91	4	chrIII+12702479~12702566	UGGACGGAGCGACGAUCGCUGAU
novelMiR_2009	25.62	45	chrIII+12708493~12708575	UUACCUAUCGGCUUUAAAUGUA
novelMiR_201	-7.29	1	chrI+2305021~2305118	GUCUCGUCAUCACUGUUAAGA
novelMiR_2010	-7.88	6	chrIII+12710620~12710717	AAAGGGGAGCUGGCACUGUGCCA
novelMiR_2012	-7.59	1	chrIII+12721441~12721538	AGAAGACUGAGCAUAUUGUGA
novelMiR_2013	-4.16	7	chrIII+12722372~12722469	CAAUUUGCCUAUUUGUCGGAAAU
novelMiR_2014	-8.87	3	chrIII+12727580~12727677	GUGGUGGUGGUGGUGGUGGUGG
novelMiR_2015	-6.43	15	chrIII+12734827~12734924	CAAAUUGUCGAUUUGCCGGAAA
novelMiR_2016	-0.54	15	chrIII+12734773~12734870	CAAAUUGUCGAUUUGCCGGAAA
novelMiR_2017	-6.06	1	chrIII+12735316~12735413	AGAUUUUUCCGCUCGGCC
novelMiR_2018	-3.39	1	chrIII+12740188~12740267	CGCCCACUUUCGGACCAAUCCG
novelMiR_2019	8.58	12	chrIII+12740400~12740486	UCCGCCCACUUUUGAACCAAUC
novelMiR_202	-7.03	1	chrI+2344347~2344444	CCGUCAGAAGGUGCCCAUCGG
novelMiR_2020	7.17	12	chrIII+12740702~12740789	UCCGCCCACUUUUGAACCAAUC
novelMiR_2021	-6.02	1	chrIII+12785451~12785548	CGGAGCAAAUCGCUGAUUGGUC
novelMiR_2022	-8.14	1	chrIII+12825726~12825823	CUGUAGUGGUACUGUAGGG
novelMiR_2023	-6.67	1	chrIII+12859500~12859597	AAUUACCGAAUAUAGCUGUUA
novelMiR_2024	-7.63	1	chrIII+12885276~12885373	GAACGAGCGGUGCAGAUACUC
novelMiR_2025	-8.41	2	chrIII+12893324~12893421	UUCCAGCAAUUUGCCGAUUUGCC
novelMiR_2026	1.54	3	chrIII+12894828~12894965	AAAAUCUCGCCGUCCAUUGACU
novelMiR_2027	-4.38	1	chrIII+12895213~12895310	UUAAUACAUUUGUGGCGUAAUU
novelMiR_2028	-3.67	1	chrIII+12898044~12898141	AAUCUCGCCGUCCAUCGACGAC
novelMiR_2029	1.11	46	chrIII+12899322~12899419	UUACCUAUCGGCUUUAAAUGUA
novelMiR_203	-5.79	9	chrI+2378229~2378326	UUACUGUAGUUUUCGCCACGAGA
novelMiR_2030	-3.99	1	chrIII+12929459~12929556	GUGGAGGUGGCGGUGGAGGUGG
novelMiR_2031	-4	1	chrIII+12938595~12938692	UUGCCAGUUUGCCGGAAAUU
novelMiR_2032	-7.32	1	chrIII+12977970~12978067	GGGCGAGCUGACGGAGAGAUGG
novelMiR_2033	-4.49	1	chrIII+12983739~12983836	UUACUACUACGCUGGCCGGGC
novelMiR_2034	-7.4	1	chrIII+12995851~12995948	AAUGUUCUAGAACCUUUUGGAA
novelMiR_2035	-5.28	1	chrIII+12997800~12997897	AAUGUUCUAGAACCUUUUGGAA
novelMiR_2036	-7.26	1	chrIII+13004414~13004511	UAGGCUUAGGCUUAGGUUUAGGC
novelMiR_2037	-8.69	1	chrIII+13011205~13011302	UGCCAGUUUGCCGAUUUGCCGGA
novelMiR_2038	-1.96	5	chrIII+13045970~13046067	AAAUUUUGAGAUGUGUCGCACA
novelMiR_2040	25.25	46	chrIII+13088134~13088217	UUACCUAUCGGCUUUAAAUGUA
novelMiR_2041	-6.62	1	chrIII+13094242~13094339	UGCCAGUUUGCCGAUUUGCCGGA
novelMiR_2042	-6.08	1	chrIII+13094375~13094472	UGCCAGUUUGCCGAUUUGCCGGA
novelMiR_2043	-6.62	1	chrIII+13095082~13095179	UGCCAGUUUGCCGAUUUGCCGGA
novelMiR_2044	-2.98	3	chrIII+13098530~13098627	ACAUUUAUGGUCUUUGGGGCAC
novelMiR_2045	1.61	30	chrIII+13142310~13142407	UGCAAAUGAAAUCGUGGGCGGGG
novelMiR_2046	-8.33	1	chrIII+13161860~13161957	AUUUCGAAAUUUGCCGCACACG
novelMiR_2047	-8.07	1	chrIII+13167964~13168061	AUGCACAAUCUCGUCAACGCCG
novelMiR_2048	-2.47	3	chrIII+13172211~13172308	CAUUUAAAGCCGAUAGGUAACC
novelMiR_2049	-7.48	1	chrIII+13175035~13175132	AGGGGUGGAGUGGCAGUGGAGC
novelMiR_2050	-6.59	1	chrIII+13180125~13180222	CUUAGGCUUAGGCUCAGUCU
novelMiR_2051	-9.01	1	chrIII+13186084~13186181	GAGAAGUAUGCAAAGGGCG
novelMiR_2052	-6.48	1	chrIII+13201128~13201225	CGGAGCAAAUCGCUGAUUGGUC
novelMiR_2053	-8.38	2	chrIII+13203329~13203426	UUUUGGGUUUUCUGCAUACACGC
novelMiR_2054	-6.69	1	chrIII+13203806~13203894	GAUUAUGCCGGUUCUGAUGUUAU
novelMiR_2055	-7.16	1	chrIII+13204176~13204273	CUGGCCGACUCCAGCACGCU
novelMiR_2056	-4.54	1	chrIII+13236503~13236600	GUCCUCGAUCGUUGCCUCAAUG
novelMiR_2057	26.08	48	chrIII+13259227~13259321	UGGCGAUGAGUGCUCUAGCAAGA
novelMiR_2059	-5.29	6	chrIII+13277875~13277972	UAAAUCGACACCAGCGCUACAGU
novelMiR_206	-4.06	1	chrI+2445952~2446049	AGCAAGAACUAUGAUUAUAACU
novelMiR_2060	-8.78	1	chrIII+13295749~13295846	AUAUCGUCAGUGGAUCUCGGC
novelMiR_2061	-1.03	2	chrIII+13317859~13317939	CGUAAAUCGACACCAGCGCUAC
novelMiR_2062	-6.21	1	chrIII+13324890~13324987	UUAGGUUUAGGCUUUGGCUU
novelMiR_2064	-6.98	1	chrIII+13344025~13344122	UUUGGCUGGAGAUUCUCAUGG
novelMiR_2065	-8.04	1	chrIII+13344994~13345091	GAGCAGAUGCCGUCGAUC
novelMiR_2066	-7.7	1	chrIII+13345504~13345601	UACAAGAAUGAAAUCGUUGGAAU
novelMiR_2067	-5.7	1	chrIII+13345776~13345873	AUGGGAAUCGGACCGGCUC
novelMiR_2068	-6.16	1	chrIII+13419276~13419373	CUGUGUGUGUGUGUGUGUGUGU
novelMiR_2069	-6.18	1	chrIII+13477112~13477209	UGAUUUGCCGAAUUUGCCGGGAA
novelMiR_207	1.79	30	chrI+2493437~2493534	UGCAAAUGAAAUCGUGGGCGGGG
novelMiR_2070	-8.49	2	chrIII+13510256~13510353	UUCACGUUGAUUGAGCCG
novelMiR_2071	-5.72	1	chrIII+13516601~13516698	UGUCGGCACUGAUGUUGGCUCC
novelMiR_2072	-5.6	1	chrIII+13519431~13519528	GUUCCUGGACGCUCGGCACGUU
novelMiR_2074	-7.92	1	chrIII+13580911~13581008	UCUGGACUCGGCUCAGAAGCAUU
novelMiR_2075	-4.08	11	chrIII+13624953~13625050	CUUGAAUACAGUUGUGACGUAAU
novelMiR_2079	-7.97	2	chrIII+13636089~13636186	UCGGUUGGCGGAGGAUGAGGAA
novelMiR_208	-7.37	1	chrI+2497151~2497248	GUGGCUCCCGGAUCCGGAUGCG
novelMiR_2080	-7.02	2	chrIII+13636034~13636131	UCGGUUGGCGGAGGAUGAGGAA
novelMiR_2082	-7.43	1	chrIII+13674283~13674380	GUGGCCUCAACUCUAUUCUUCGG
novelMiR_2083	-8.89	1	chrIII+13689474~13689571	UCGCGAGUCGACAACGGC
novelMiR_2084	-4.85	1	chrIII+13690738~13690835	AGAGGAGAUUGGUGUGAGCGGU
novelMiR_2085	3.98	2	chrIII+13694624~13694710	AGCGAAAACUACAGUAAGAACU
novelMiR_2086	-5.52	1	chrIII+13705201~13705298	CCCCACUGACCAUAAAUGUAC
novelMiR_2087	-7.82	2	chrIII+13724411~13724508	UCACGUGGUGUCAGGCUG
novelMiR_2088	-6.65	1	chrIII+13769233~13769330	AGGAACCGUUUCAAGGUGUCUG
novelMiR_2089	-6.23	2	chrIV+5613~5710	AGUUUGCACCGUCCGGAUGG
novelMiR_209	-3.7	1	chrI+2499590~2499687	AUUUAAAGCCGAUAGGUAACC
novelMiR_2090	-8.8	1	chrIV+39378~39475	GUUGAGAUUCCCGUCGACUAG
novelMiR_2091	-8.66	1	chrIV+39764~39861	GUUGGCCGCCGGUUUUUCCUG
novelMiR_2093	-5.67	2	chrIV+191527~191615	UAUUUAAAAGUCGAUGGACGGC
novelMiR_2094	-6.21	3	chrIV+210194~210291	CAUUUAAAGCCGAUAGGUAACC
novelMiR_2095	-4.15	1	chrIV+227961~228058	UUGUGAUCGCCGAUCGCCGAAA
novelMiR_2096	-8.54	1	chrIV+227905~228002	UUGUGAUCGCCGAUCGCCGAAA
novelMiR_2097	-5.63	1	chrIV+245816~245913	UUGGCUGAACUUGGGCAAAAGU
novelMiR_2098	-5.27	1	chrIV+264786~264883	GCAAGACUAAUAGAGACU
novelMiR_2099	-5.67	1	chrIV+273888~273985	UUGGGCAAAAGUUGGGCAAGA
novelMiR_210	35.89	72	chrI+2538603~2538682	CGCGGGACUAGUCAAGUGUCGGC
novelMiR_2100	-7.96	1	chrIV+273831~273928	UUGGGCAAAAGUUGGGCAAGA
novelMiR_2101	-6.65	1	chrIV+334574~334671	AUUCGGCAAUUUCGGCAGUU
novelMiR_2102	-8.64	1	chrIV+420633~420730	CUUCUGAGUGUCUUUGCCAGUU
novelMiR_2103	-2.14	1	chrIV+426777~426896	CGGAGGUUUUGGCGGUGGUCGU
novelMiR_2104	-9.05	1	chrIV+446619~446716	GAGAAAAAAUGCGAAAAAUCGGU
novelMiR_2105	-3.5	1	chrIV+448802~448899	CAAAUAUAGUGACUCUGGCCG
novelMiR_2106	-3.88	2	chrIV+503604~503701	CGCGCCAGGAGUAGCAAACUGC
novelMiR_2109	-5.62	1	chrIV+608174~608271	UCUCGCCUAACUCUCGCCUAUC
novelMiR_211	-8.12	1	chrI+2577225~2577322	GCUGCGAGAAGGAGGAAG
novelMiR_2110	-4.58	1	chrIV+618587~618684	GCGUUGAGAGCCAUCGGAGGAAC
novelMiR_2111	-8.99	1	chrIV+624104~624201	AGGACGACCCUUGGGAAGUC
novelMiR_2112	-5.41	1	chrIV+654110~654207	GGACACGGACGCGGUAGACAAC
novelMiR_2114	-7.88	1	chrIV+722338~722435	AAGGUGGCAAAAGGGUGGGAGAA
novelMiR_2115	-6.35	6	chrIV+741097~741194	AGGUAGCUGAACUUGGCGAGA
novelMiR_2116	-4.13	1	chrIV+753388~753485	CUGGGAGUAUGCUGACAGUCGGC
novelMiR_2117	-6.64	1	chrIV+762706~762803	GUCCUGGUGGUCCGGCUGGUC
novelMiR_2118	-5.61	1	chrIV+763596~763693	ACAUUGCUGUACCGACUGACGAA
novelMiR_2119	-4.94	1	chrIV+859821~859918	UGUGUGGAUCCGGCUAUGCA
novelMiR_212	-0.58	3	chrI+2584673~2584769	CGUCCAUCGACUUUAAAAUACC
novelMiR_2120	-6.69	1	chrIV+868486~868583	AUCGCCGAUCGCCGAUUGC
novelMiR_2121	-4.4	1	chrIV+939827~939904	AGGCUACGGCUUAGGCUCUGGC
novelMiR_2122	-4.39	1	chrIV+951057~951154	UGCCGAGUUGGGACCAAUUGA
novelMiR_2123	-4.4	1	chrIV+982492~982589	UAGUUUUCGUGGCGGGACCCA
novelMiR_2124	-7.32	1	chrIV+985991~986088	UAGUUUUCGUGGCGGGACCCA
novelMiR_2125	-4.13	1	chrIV+995255~995352	CCCCACUGACCAUAAAUGUAC
novelMiR_2126	-7.15	1	chrIV+1021924~1022021	AAAAGGCCACCGAUUUCACUGCA
novelMiR_2127	-5.84	1	chrIV+1029513~1029610	GAGCCGGGAAGGUCGAUGGCUA
novelMiR_2128	-7.21	1	chrIV+1056042~1056139	GCUCUUCGGUCUGUGCUUUGA
novelMiR_2129	-8.72	1	chrIV+1061363~1061460	GUGGGUCCGUUCAUGAGAUUG
novelMiR_213	-3.85	1	chrI+2592042~2592139	UGUUCGUCAGCGCUGAGAUCAGA
novelMiR_2130	-4.43	1	chrIV+1084142~1084239	CGCACAAAAAGUUGAAUUUUGGA
novelMiR_2131	-3.54	1	chrIV+1128204~1128301	UAGGCUUAGGCUUAGGUUUAGGC
novelMiR_2132	-7.89	1	chrIV+1139169~1139248	CGGAAAAUUGCCGAUUUGCCGGA
novelMiR_2133	-8.38	1	chrIV+1180344~1180441	UGAUGGUUUGAAUAGUGGUAUUC
novelMiR_2134	-6.98	1	chrIV+1181077~1181174	UGAUGGUUUGAAUAGUGGUAUUC
novelMiR_2135	-8.38	1	chrIV+1182468~1182565	UGAUGGUUUGAAUAGUGGUAUUC
novelMiR_2136	-3.95	1	chrIV+1183815~1183912	UCUGCAUUUUUUCGUGGGAU
novelMiR_2137	-8.38	1	chrIV+1185714~1185811	UGAUGGUUUGAAUAGUGGUAUUC
novelMiR_2138	-6.98	1	chrIV+1186170~1186267	UGAUGGUUUGAAUAGUGGUAUUC
novelMiR_2139	-5.99	3	chrIV+1194311~1194408	AAACACCGGAUUUCACGCCAAA
novelMiR_214	-4.5	2	chrI+2610776~2610852	UGCAAUUUGCCGAUUUGCCGGA
novelMiR_2140	-3.58	1	chrIV+1198383~1198480	UUUGAAAAAAGUUGGGUCUCGCC
novelMiR_2141	-6.05	1	chrIV+1218699~1218796	UUUGAAAAAAGUUGGGUCUCGCC
novelMiR_2142	-7.35	1	chrIV+1219012~1219109	AUUGGGUCUCGCCACGAAAACU
novelMiR_2143	-6.36	1	chrIV+1233937~1234034	CUUUUGGGGCUACAGUACCC
novelMiR_2144	-8.7	1	chrIV+1279983~1280080	AUUGCCGGACUUGAAAUU
novelMiR_2145	-5.38	1	chrIV+1280115~1280212	AUUGCCGGACUUGAAAUU
novelMiR_2146	-8.7	1	chrIV+1280628~1280725	AUUGCCGGACUUGAAAUU
novelMiR_2147	-5.38	1	chrIV+1280568~1280665	AUUGCCGGACUUGAAAUU
novelMiR_2148	-8.7	1	chrIV+1280724~1280821	AUUGCCGGACUUGAAAUU
novelMiR_2149	-5.38	1	chrIV+1280664~1280761	AUUGCCGGACUUGAAAUU
novelMiR_215	-8.75	1	chrI+2624852~2624949	CAAUUUGCUGAUUUGCCGGAAA
novelMiR_2150	-5.38	1	chrIV+1280760~1280857	AUUGCCGGACUUGAAAUU
novelMiR_2151	-8.7	1	chrIV+1281273~1281370	AUUGCCGGACUUGAAAUU
novelMiR_2152	-5.38	1	chrIV+1281213~1281310	AUUGCCGGACUUGAAAUU
novelMiR_2153	-8.7	1	chrIV+1281369~1281466	AUUGCCGGACUUGAAAUU
novelMiR_2154	-5.38	1	chrIV+1281309~1281406	AUUGCCGGACUUGAAAUU
novelMiR_2155	-7.88	1	chrIV+1281465~1281562	AUUGCCGGACUUGAAAUU
novelMiR_2156	-5.38	1	chrIV+1281405~1281502	AUUGCCGGACUUGAAAUU
novelMiR_2157	-8.7	1	chrIV+1281596~1281693	AUUGCCGGACUUGAAAUU
novelMiR_2158	-7.88	1	chrIV+1281692~1281789	AUUGCCGGACUUGAAAUU
novelMiR_2159	-5.38	1	chrIV+1281632~1281729	AUUGCCGGACUUGAAAUU
novelMiR_216	-1.39	5	chrI+2627475~2627572	UGCCUAUCGGCCUAAAAGUUGUC
novelMiR_2160	-8.7	1	chrIV+1281823~1281920	AUUGCCGGACUUGAAAUU
novelMiR_2161	-7.88	1	chrIV+1281919~1282016	AUUGCCGGACUUGAAAUU
novelMiR_2162	-5.38	1	chrIV+1281859~1281956	AUUGCCGGACUUGAAAUU
novelMiR_2165	-8.38	1	chrIV+1324534~1324631	UGAUGGUUUGAAUAGUGGUAUUC
novelMiR_2167	-7.53	1	chrIV+1330542~1330639	UGAUGGUUUGAAUAGUGGUAUUC
novelMiR_2168	-8.38	1	chrIV+1331258~1331355	UGAUGGUUUGAAUAGUGGUAUUC
novelMiR_2169	-8.38	1	chrIV+1334169~1334266	UGAUGGUUUGAAUAGUGGUAUUC
novelMiR_2170	-6.98	1	chrIV+1338160~1338257	UGAUGGUUUGAAUAGUGGUAUUC
novelMiR_2171	-6.98	1	chrIV+1350449~1350546	UGAUGGUUUGAAUAGUGGUAUUC
novelMiR_2172	-8.38	1	chrIV+1351234~1351331	UGAUGGUUUGAAUAGUGGUAUUC
novelMiR_2173	-8.38	1	chrIV+1352587~1352684	UGAUGGUUUGAAUAGUGGUAUUC
novelMiR_2174	-6.98	1	chrIV+1353355~1353452	UGAUGGUUUGAAUAGUGGUAUUC
novelMiR_2175	-7.41	1	chrIV+1377751~1377848	GCGCGCACCGAACUCUGGCAGGG
novelMiR_2176	-4.23	1	chrIV+1396077~1396174	UAGUUUUCGUGGCGGGACCCA
novelMiR_2177	-4.12	1	chrIV+1399596~1399693	UGGGUCCCGGUGCGAAAUUCUC
novelMiR_2178	-7.85	1	chrIV+1439425~1439522	UCUUGAUGCUGCGCUCGUGCC
novelMiR_2179	-0.76	6	chrIV+1480460~1480557	UGCGUCUCCCCCUCCUCCACA
novelMiR_2180	-8.38	1	chrIV+1506772~1506869	UGAUGGUUUGAAUAGUGGUAUUC
novelMiR_2181	-5.93	5	chrIV+1536638~1536735	AUCCCGUGAGGUGUCGGCCGCUC
novelMiR_2182	-5.37	1	chrIV+1544951~1545048	CGGGCAGGUUGGAGGCAGGCGUC
novelMiR_2183	-6.4	1	chrIV+1557562~1557659	UGCUGGCAGGAAGUUGCCGAGU
novelMiR_2184	-7.63	1	chrIV+1577993~1578090	UCGGCAAACGGCAACUUUCAGGC
novelMiR_2185	-3.12	1	chrIV+1614899~1614996	UUCGGCAAGUCCACUUUUUGAAU
novelMiR_2186	-7.75	3	chrIV+1656119~1656216	UUUCCAAAUUUUUGAGCGGCC
novelMiR_2187	-7.08	1	chrIV+1657195~1657292	AGAGGCAGAGAGACGCAGACUAG
novelMiR_2188	-6.45	1	chrIV+1679523~1679620	CACGCGCGUCGCUUUAAAGGU
novelMiR_2189	-4.53	1	chrIV+1692318~1692415	CGCACAAAAAGUUGAAUUUUGGA
novelMiR_219	-5.83	1	chrI+2714966~2715063	UGCUCGUCGGCGCCGGUU
novelMiR_2190	-7.62	1	chrIV+1711376~1711473	AUUUCGCUGCAAGACCUG
novelMiR_2191	-4.72	1	chrIV+1730568~1730665	CGCACAAAAAGUUGAAUUUUGGA
novelMiR_2192	-4.68	1	chrIV+1743505~1743602	CGCACAAAAAGUUGAAUUUUGGA
novelMiR_2193	-7.4	1	chrIV+1751790~1751887	CCCGUCUGGAAGUUUUUUUCUGC
novelMiR_2194	-2.71	1	chrIV+1805742~1805839	AGUGUGGGGUGAGGGGAG
novelMiR_2195	-6.64	1	chrIV+1865372~1865469	CGUUAUGGGAGAGUUGGCUAU
novelMiR_2196	-8.81	1	chrIV+1868600~1868697	UGAUCUUCAAAAAAUGCGGGAG
novelMiR_2197	-4.62	1	chrIV+1871078~1871175	UUGGGGUCGUGAGCCGUCGACU
novelMiR_2199	-2.11	46	chrIV+1874692~1874789	UUACCUAUCGGCUUUAAAUGUA
novelMiR_22	-4.16	1	chrI+409962~410059	CUCGCCGUCCAUCGAUUUUU
novelMiR_2201	-8.58	1	chrIV+1917911~1918008	UGACGUCGUCGAAGGAGGAGA
novelMiR_2202	-7.41	1	chrIV+1918325~1918422	UAAGAGUUGGGGGAAACU
novelMiR_2203	-8.72	1	chrIV+1919864~1919961	GGCUGGUAGCUCGGAGGACGA
novelMiR_2204	-7.27	1	chrIV+1926533~1926630	UAGUUUUCGUGGCGGGACCCA
novelMiR_2205	-7.43	1	chrIV+1928716~1928813	CAAUUCGCCGAUUUGCUGGAAAU
novelMiR_2206	-7.61	1	chrIV+1930247~1930344	UUUCGUCGCGGGACCCUGAA
novelMiR_2207	-4.91	1	chrIV+1930388~1930485	UAGUUUUCGUGGCGGGACCCA
novelMiR_2208	-7.19	2	chrIV+1933525~1933622	UUCCAGCAAUUUGCCGAUUUGCC
novelMiR_2209	-8.27	11	chrIV+1954893~1954990	CUUGAAUACAGUUGUGACGUAAU
novelMiR_221	1.21	17	chrI+2729354~2729451	UCUCGCCGUCCAUCGACUUUAA
novelMiR_2210	-7.07	1	chrIV+1960660~1960757	GGUUCCAUGUGAUCGUUUCGACG
novelMiR_2211	-8.41	1	chrIV+1983151~1983248	UCAGAAUUUGGAGGAUUGGAAU
novelMiR_2212	-7.66	2	chrIV+1993165~1993245	CCACCGGUGAAAAGAGCUCG
novelMiR_2213	-4.68	1	chrIV+1998904~1999001	CGCACAAAAAGUUGAAUUUUGGA
novelMiR_2214	-4.72	1	chrIV+2024593~2024690	UAAGGUAUUUAAAAGUCGAUGGA
novelMiR_2215	-1.4	5	chrIV+2040068~2040165	UAUUUAAAAUUCGAUGGACGGC
novelMiR_2216	47.68	87	chrIV+2078999~2079092	AUGGCCUAGUGGAUAAGAGGGA
novelMiR_2217	-4.97	3	chrIV+2083403~2083484	UAUUUGUGUGUGUGUGUGAGGC
novelMiR_2218	-7.37	1	chrIV+2088482~2088579	AAGGACUAUGGUGAAGAAU
novelMiR_2219	-5.72	2	chrIV+2132170~2132267	UUCGGGCUCCAGAGAAUAUGG
novelMiR_222	-8.85	1	chrI+2741442~2741539	GAAAGGUCGAGUACGGUUGUGC
novelMiR_2220	-8.74	1	chrIV+2144208~2144305	GGUAGUCGAUGGUUCGAUU
novelMiR_2221	-7.19	1	chrIV+2161761~2161858	UAGUUUUCGUGGCGGGACCCA
novelMiR_2222	-2.72	3	chrIV+2176775~2176872	CAAAUUUUAAGUUGGUGGCCUAG
novelMiR_2223	1.51	46	chrIV+2183614~2183711	UUACCUAUCGGCUUUAAAUGUA
novelMiR_2224	-2.88	1	chrIV+2203463~2203560	CCACCGCUGCAAGUGCGCCCCA
novelMiR_2225	-6.56	1	chrIV+2203473~2203570	UGGGGCGCACUUGCAGCGGUGGA
novelMiR_2226	-5.93	1	chrIV+2213687~2213784	GAGGAUAAAGUAGGGGGAA
novelMiR_2227	-7.68	1	chrIV+2219549~2219646	AAUGUCUCUGCGUCUCUUGCAC
novelMiR_2229	-8.48	1	chrIV+2237444~2237541	UUGAAGACCCAGCAAUCUG
novelMiR_223	-6.27	1	chrI+2744589~2744686	UUAGGCUGGGCUGGGGGCAGUU
novelMiR_2230	-4.84	1	chrIV+2250872~2250969	CAAUUUGCUGAUUUGCCGGAAU
novelMiR_2231	-8.27	2	chrIV+2283194~2283291	UUCGGCAAGUUGCCAGUUUGCC
novelMiR_2232	-5.87	3	chrIV+2328356~2328453	UUCUACGACUUUAAAGGCGCG
novelMiR_2233	-9.03	1	chrIV+2378927~2379011	GGCUUGUUGGAUGGUCCGAAU
novelMiR_2234	-4.06	1	chrIV+2379150~2379247	CCCGGGUCCCACCACGAAAACU
novelMiR_2235	-3.39	1	chrIV+2379670~2379767	CGUCGAUUAAGGUACAUUUAAA
novelMiR_2236	-3.55	1	chrIV+2396585~2396682	CUUAGGCUUGUCGGAUUGGGGAU
novelMiR_2237	-5.18	1	chrIV+2447092~2447189	GUUUGCCGGAUAUCAGAUUUGC
novelMiR_2238	-8.94	1	chrIV+2495076~2495173	GAAUCGCUGUUGUUUUUGUCGGU
novelMiR_2239	-4.1	1	chrIV+2501285~2501382	UGGUUUUUUGGUCGAUGCGGG
novelMiR_224	2.07	16	chrI+2761622~2761719	GUAAAUCGACACAAGCGGCU
novelMiR_2240	-0.97	6	chrIV+2502423~2502520	ACGGAGUUAAAUUUGAAUUUUU
novelMiR_2241	-5.9	1	chrIV+2502881~2502978	GUCUUGGGCAGCGGUUCUGGCC
novelMiR_2243	-2.82	3	chrIV+2506320~2506417	CAUUUAAAGCCGAUAGGUAACC
novelMiR_2244	-6.61	1	chrIV+2517168~2517265	GAAAUUGCCGAUUUGCCGGAAAU
novelMiR_2245	-6.4	1	chrIV+2517595~2517692	GAAAUUGCCGAUUUGCCGGAAAU
novelMiR_2246	-5.97	1	chrIV+2593118~2593215	GGUUCGGCAACUUCGGCAAUUG
novelMiR_2247	-7.78	1	chrIV+2600402~2600499	CAAUUUGCCAAUUUGCCUGAAA
novelMiR_2248	-8.84	1	chrIV+2620448~2620545	UAGUUUUCGUGGCGGGACCCA
novelMiR_2249	-6.5	1	chrIV+2620391~2620488	UAGUUUUCGUGGCGGGACCCA
novelMiR_225	-1.69	4	chrI+2774536~2774627	CAAUUCUCUUCGUCCAUCGACU
novelMiR_2250	-5.93	1	chrIV+2647983~2648080	GAGGAUAAAGUAGGGGGAA
novelMiR_2251	-5.26	1	chrIV+2754940~2755037	AUUCUGGAAUGUUCUAGAACCU
novelMiR_2252	-5.02	1	chrIV+2754970~2755067	AUUCUGGAAUGUUCUAGAACCU
novelMiR_2253	-5.26	1	chrIV+2755100~2755197	AUUCUGGAAUGUUCUAGAACCU
novelMiR_2254	-4.79	1	chrIV+2755210~2755307	AUUCUGGAAUGUUCUAGAACCU
novelMiR_2255	-8.46	1	chrIV+2755364~2755461	AUUCUGGAAUGUUCUAGAACCU
novelMiR_2256	-5.04	1	chrIV+2755500~2755597	AUUCUGGAAUGUUCUAGAACCU
novelMiR_2257	-6.71	1	chrIV+2755660~2755757	AUUCUGGAAUGUUCUAGAACCU
novelMiR_2258	-6.32	1	chrIV+2755730~2755827	AUUCUGGAAUGUUCUAGAACCU
novelMiR_2259	-5.04	1	chrIV+2756020~2756117	AUUCUGGAAUGUUCUAGAACCU
novelMiR_226	-4.9	3	chrI+2797824~2797921	UUUCACCCAACUCUUGCCAAAC
novelMiR_2260	-5.68	1	chrIV+2756130~2756227	AUUCUGGAAUGUUCUAGAACCU
novelMiR_2261	-8.46	1	chrIV+2756300~2756397	AUUCUGGAAUGUUCUAGAACCU
novelMiR_2262	-4.56	1	chrIV+2756250~2756347	AUUCUGGAAUGUUCUAGAACCU
novelMiR_2263	-8.27	1	chrIV+2756777~2756874	GAGUACGCCAGUCGGAGCAC
novelMiR_2264	-3.72	2	chrIV+2789915~2790012	UCUCGCCGUCCAUCGACUUU
novelMiR_2265	-6.46	1	chrIV+2818759~2818856	GUUUGCCGGAUAUCAGAUUUGC
novelMiR_2266	-6.59	1	chrIV+2848790~2848887	GUUUGUGGACGAUGGGGAGAGU
novelMiR_2267	-4.89	3	chrIV+2850214~2850311	UCCCCUCGCCACACUUUCUCACA
novelMiR_2268	1.97	16	chrIV+2877284~2877381	UCUCGCCGUCCAUCGACUUUAA
novelMiR_227	-5.39	1	chrI+2809594~2809691	GGCAAAUCGGCAAAUUGUCGGA
novelMiR_2270	-5.46	1	chrIV+2885550~2885647	AUAUUGCCGGUUUGCCGGAAAU
novelMiR_2271	-7.93	2	chrIV+2885770~2885867	AUAUUGCCGAUUUGCCGGAAAU
novelMiR_2272	-7.75	2	chrIV+2885978~2886075	AUAUUGCCGAUUUGCCGGAAAU
novelMiR_2273	-7.02	1	chrIV+2886151~2886248	AAUUUGUCGGUUUGCCGG
novelMiR_2274	-7.12	2	chrIV+2886383~2886480	AUAUUGCCGAUUUGCCGGAAAU
novelMiR_2275	-6.79	2	chrIV+2886327~2886424	AUAUUGCCGAUUUGCCGGAAAU
novelMiR_2276	-5.38	2	chrIV+2888547~2888644	ACCGGAUCACCGUGCUCUCCG
novelMiR_2277	-2.94	3	chrIV+2905482~2905579	UCUAAGUUCAUUUUGGCGGCCA
novelMiR_2279	-7.7	1	chrIV+2927741~2927838	GCGCUUGAUGAGCUCGGCCU
novelMiR_228	-6.22	1	chrI+2835534~2835631	AAUUCUCGGAGAUCAAACCGC
novelMiR_2280	-8.27	1	chrIV+2996034~2996131	AUGUGUGUGUGUGUGUGUGUGU
novelMiR_2281	-8.27	1	chrIV+2996722~2996819	AUGUGUGUGUGUGUGUGUGUGU
novelMiR_2282	-5.75	1	chrIV+2997940~2998037	CCGUAUAACUCCAUUUCUAGG
novelMiR_2283	-7.39	1	chrIV+2998784~2998881	CAGGCUGAGUGGUGUGGUGGGGC
novelMiR_2285	-2.65	2	chrIV+3021442~3021539	CGGACAAUUUCCGAGUUUGGCC
novelMiR_2286	-3.76	1	chrIV+3021442~3021539	GCCAAACUCGGAAAUUGUC
novelMiR_2287	-5.12	1	chrIV+3038300~3038397	GUUGAGCAGCUGGAACUGGUCU
novelMiR_2289	-6.78	1	chrIV+3049608~3049705	GUGAAUCGGACGAUGGCGACG
novelMiR_229	-8.51	1	chrI+2869411~2869508	UCCCCUUUUUUGUUGGUA
novelMiR_2290	-7.89	1	chrIV+3052135~3052232	GAGGAUUUGAGUGUAGGCG
novelMiR_2291	-4.58	3	chrIV+3106801~3106898	CAUUUAAAGCCGAUAGGUAACC
novelMiR_2292	-3.14	1	chrIV+3109246~3109343	CACCCAUCGACCGAAAAAGCAU
novelMiR_2293	1.94	16	chrIV+3119931~3120028	UCUCGCCGUCCAUCGACUUUAA
novelMiR_2294	-8.51	1	chrIV+3135316~3135413	UGUCUUCAAGGAGUAGGAGGAGC
novelMiR_2295	-7.83	2	chrIV+3147144~3147241	CGCGGACGAGAAAACUUGAGAA
novelMiR_2296	-3.18	1	chrIV+3149345~3149442	CAAAUUGCCGGAAUUGAAC
novelMiR_2297	-3.39	1	chrIV+3149657~3149754	CAAAUUGCCGGAAUUGAAC
novelMiR_2298	-5.82	1	chrIV+3149598~3149695	CAAAUUGCCGGAAUUGAAC
novelMiR_2299	-5.82	1	chrIV+3149824~3149921	CAAAUUGCCGGAAUUGAAC
novelMiR_23	-2.68	4	chrI+436173~436270	UGGGCGGAGCAAAUUGCUGAUU
novelMiR_230	-8.02	1	chrI+2875849~2875946	GAUGGUGCUGGUCUCCGAAGAC
novelMiR_2300	-3.18	1	chrIV+3150260~3150357	CAAAUUGCCGGAAUUGAAC
novelMiR_2301	-7.75	1	chrIV+3152554~3152651	CGAUUUGCCGAAUUUGUCGACA
novelMiR_2302	-7.34	1	chrIV+3157253~3157350	UCCGGGCAAGCUGACGCCA
novelMiR_2303	-3.48	2	chrIV+3186331~3186428	UUUCACCCAACUCUUGCCAAAC
novelMiR_2304	0.53	8	chrIV+3186452~3186549	UUUGGCAAGAGUUGGGUGAAA
novelMiR_2305	-5.47	2	chrIV+3199729~3199826	AAGACUUUGGCAAAACUUGGA
novelMiR_2306	-1.58	8	chrIV+3199839~3199936	UUUGGCAAGAGUUGGGUGAAA
novelMiR_2307	-5.34	3	chrIV+3205640~3205737	UUCGGCAAAUCGGCAAAUCGGC
novelMiR_2308	-8.89	1	chrIV+3210325~3210422	GGAGUAUCCGGUCGCUGAUGAUA
novelMiR_2309	-7.73	1	chrIV+3210321~3210418	CAUUCGGGCAUUUCGAGCC
novelMiR_231	-6.87	1	chrI+2888459~2888556	UUGGCGAAAGGGUUGCGAAAAUG
novelMiR_2310	-6.24	1	chrIV+3218144~3218241	CGGAGCAAAUCGCUGAUUGGUC
novelMiR_2311	-7.75	2	chrIV+3226705~3226802	CGAUUUGCCGAAUUUGCCGA
novelMiR_2312	-3.31	2	chrIV+3245254~3245351	UCCGGCAAUCGGCAAUUUCGGU
novelMiR_2313	-6.87	1	chrIV+3248755~3248852	AUCGGUGAAAAACACAAGAAAAC
novelMiR_2314	-7.6	1	chrIV+3253797~3253894	AAUGUCAACAUCUCCGUACGGA
novelMiR_2315	-3.21	6	chrIV+3268655~3268752	UAAAUCGACACCAGCGCUACAGU
novelMiR_2316	-7.16	1	chrIV+3279733~3279830	UUGGCUCUAGCUUCUUGCCCAAG
novelMiR_2317	-4.75	1	chrIV+3279844~3279941	UUGGCAAAACUUGGGCAAAAG
novelMiR_2318	-5.03	1	chrIV+3279787~3279884	UUGGCAAAACUUGGGCAAAAG
novelMiR_2319	-7.74	2	chrIV+3304017~3304100	CUCUUCUUGCUCUCAUCGCCGGA
novelMiR_2320	-4.92	1	chrIV+3305909~3306006	CUUCUUGUACUCGUCGCCGGA
novelMiR_2322	-3.23	1	chrIV+3362153~3362250	UGGGGUGAGGGGAGACGCA
novelMiR_2323	-6.28	1	chrIV+3362094~3362191	UGGGGUGAGGGGAGACGCA
novelMiR_2324	-3.92	1	chrIV+3367526~3367623	UCUGAUCCUUCGGAGCUGAAGGA
novelMiR_2325	-7.75	2	chrIV+3367600~3367697	UACCCCCUGUGAUCCUUCGGAGC
novelMiR_2326	-3.75	1	chrIV+3367842~3367939	UCUGAUCCUUCGGAGCUGAAGGA
novelMiR_2327	-7.89	1	chrIV+3372508~3372621	GAGUGCCUCCGUUGACGGC
novelMiR_2329	-8.57	2	chrIV+3383204~3383301	GUGCGGUAUUGUGGACGUGAUUU
novelMiR_233	-3.05	2	chrI+2918185~2918282	AUCUCGCGGUCCAUCGACUUUA
novelMiR_2330	-5.9	77	chrIV+3433879~3433976	UAGGCUUCGCAGUAGAUUAAG
novelMiR_2331	-4.85	1	chrIV+3536779~3536876	GCAGCACUAAUAGAGAAUAUACG
novelMiR_2334	-6.31	6	chrIV+3639373~3639470	UACGUCACAACUGUAUUCAAGU
novelMiR_2335	-5.47	1	chrIV+3645680~3645777	GUGGAGCAUCUGGAAGGCCGGU
novelMiR_2336	-3.41	1	chrIV+3648557~3648663	GCACGAGUCGUUGAAGUAGGA
novelMiR_2337	-6.31	1	chrIV+3671477~3671574	UCCGGAAUGGUCCAGAAUUUUCU
novelMiR_2338	-3.79	1	chrIV+3671557~3671654	UCCGGAAUGGUCCAGAAUUUUCU
novelMiR_2339	-7.19	1	chrIV+3672272~3672369	GAGUACGCCAGUCGGAGCAC
novelMiR_234	-3.69	1	chrI+2920441~2920538	CGGAGCAAAUCGCUGAUUGGUC
novelMiR_2340	-4.74	1	chrIV+3688190~3688287	GUGGCCUGGGAUUCCUCGACC
novelMiR_2341	-6.63	1	chrIV+3711077~3711174	UCUGCGUCUCUUCCCCUCAUUU
novelMiR_2342	-8.94	1	chrIV+3723055~3723152	UCGGGUGAAAAUGCGCAAAAU
novelMiR_2343	-8.99	1	chrIV+3726181~3726278	GCAUCGUGGAGCUCUGUUCAGAC
novelMiR_2344	-4.11	1	chrIV+3745924~3746021	AGGGAGGCUUGUCGGAUGU
novelMiR_2345	-7.48	1	chrIV+3795197~3795294	GCGGCUAUGGAACUGGGUACGG
novelMiR_2346	-5.96	1	chrIV+3825940~3826037	AGGCAUGUAGGAAUGUAGGCAUG
novelMiR_2347	-3.98	1	chrIV+3825890~3825987	AGGCAUGUAGGAAUGUAGGCAUG
novelMiR_2348	-4.18	3	chrIV+3854784~3854881	CACACACACACACACACAUUCU
novelMiR_2349	-3.41	1	chrIV+3864616~3864713	GGCGCAGUCGGCUACGGCUU
novelMiR_235	-5.7	3	chrI+2923461~2923558	CAUUUAAAGCCGAUAGGUAACC
novelMiR_2350	-7.51	1	chrIV+3875571~3875668	GAUGGGCGUUGAGUAGUUGCU
novelMiR_2351	-7.23	2	chrIV+3914262~3914359	CGGCAACUUGCCGAUUUGCCGGA
novelMiR_2352	-7.88	1	chrIV+3962857~3962954	UGUGAUCUGAGGAUGGCAAGAAC
novelMiR_2353	-6.79	1	chrIV+3962802~3962899	UGUGAUCUGAGGAUGGCAAGAAC
novelMiR_2355	-5.59	2	chrIV+4014403~4014500	ACCCAGGUCGCUAGGUCG
novelMiR_2356	-2.4	2	chrIV+4014343~4014440	ACCCAGGUCGCUAGGUCG
novelMiR_2357	-8.83	1	chrIV+4020086~4020183	UAGAGGAAAGAGAUAGCGGC
novelMiR_2358	-7.23	1	chrIV+4050198~4050295	UAGAUGAGGAGAUUGUAGGAG
novelMiR_2359	-5.86	1	chrIV+4126697~4126794	CGUUCACGGACCGGGAACGGCU
novelMiR_236	-2.99	2	chrI+2998695~2998792	UACGGGCUCGAUUUUCGAAA
novelMiR_2361	-7.92	3	chrIV+4149813~4149910	UGGCAAGAGUUGGGUGAAACUU
novelMiR_2362	-4.66	3	chrIV+4149758~4149855	UGGCAAGAGUUGGGUGAAACUU
novelMiR_2363	-7.33	2	chrIV+4206189~4206286	UCCGCGGAUAAAUUUUUUACAGA
novelMiR_2364	-8.08	1	chrIV+4238723~4238820	CAAAAAAGUCGGGCAAAAAU
novelMiR_2365	-8.97	1	chrIV+4241348~4241445	GGAGGAACUGUACGUCUCGUAAA
novelMiR_2366	-4.45	1	chrIV+4262641~4262738	UUCGGGCAAAUCGGCAAAU
novelMiR_2367	-4.71	1	chrIV+4301342~4301439	GGCGGGCACCGCCGGCGGCUGC
novelMiR_2368	-6.57	1	chrIV+4310544~4310641	CGCCAGAGGAGUCGGCUGCUGCU
novelMiR_2369	-7.09	1	chrIV+4312123~4312220	AGAUCUGGAGGAGCUCGAACCCU
novelMiR_237	7.09	9	chrI+3002166~3002246	UUACCUAUCGGCUUUAAAUGU
novelMiR_2370	-5.12	2	chrIV+4312654~4312751	CUCGAAGCAGGCGUCGGC
novelMiR_2372	-4.35	2	chrIV+4316304~4316401	ACAGUAUGUCGCUUCAGGACC
novelMiR_2373	-3.71	1	chrIV+4316416~4316513	AUGCGGCACAGAAAAAUAGGCG
novelMiR_2374	-8.32	1	chrIV+4326115~4326212	AUUUAAAGCCGAUAGGUAACC
novelMiR_2375	-7.83	1	chrIV+4358405~4358502	AUACAGUUUUAAAACCGUGCGGC
novelMiR_2376	-4.67	1	chrIV+4362843~4362940	ACGAACCGCUCCUUCUCG
novelMiR_2377	-7.06	1	chrIV+4364160~4364257	AUGAGCUCAAUCUGGCGCCGA
novelMiR_2378	-5.15	1	chrIV+4369208~4369305	CGAGACUUGACAGUGGAGCAGC
novelMiR_238	-2.98	2	chrI+3007234~3007331	AGUAGAUUUAUGUUCUUUGGGAC
novelMiR_2380	-6.36	1	chrIV+4437613~4437710	CUCUCUUUUCCACACGCUCUCU
novelMiR_2381	-4.59	1	chrIV+4474893~4474990	CGCUUUUUGGGCCAAUGGGGACG
novelMiR_2382	4.93	5	chrIV+4475561~4475660	ACUCGGCAGUUUGCUACUCC
novelMiR_2383	-7.87	1	chrIV+4497761~4497858	CGAUUUGCCGAAUUUGUCGACA
novelMiR_2384	-3.06	11	chrIV+4506295~4506392	CUUGAAUACAGUUGUGACGUAAU
novelMiR_2386	-6.64	1	chrIV+4658289~4658386	GUCGUGCGUUGGAUGAGAAUA
novelMiR_2387	-7.89	1	chrIV+4673020~4673117	UUUGUGCUCCCGUCGCUUCUGGG
novelMiR_2389	-8.64	1	chrIV+4679897~4679994	UGUGAGGGAGAAGUUGAGUCGAC
novelMiR_239	25.61	46	chrI+3017334~3017417	UUACCUAUCGGCUUUAAAUGUA
novelMiR_2390	-7.33	1	chrIV+4685306~4685403	UGCUCGUAAAAUAUGGUG
novelMiR_2391	-1.93	20	chrIV+4706029~4706126	UAGCCGGAGCGAAUCGCUGAUU
novelMiR_2393	-6.47	1	chrIV+4713239~4713336	GAGAACUUGAUCGGCUUCGGG
novelMiR_2394	-6.82	1	chrIV+4753013~4753110	CCUUGCCGGAUCCAGAGACGG
novelMiR_2395	-8.84	1	chrIV+4793882~4793979	GUUGAUGGUCCACCGUAAUCGU
novelMiR_2396	-4.64	1	chrIV+4932729~4932826	UCCGGCAAAUCAGCAAACC
novelMiR_2397	-6.44	6	chrIV+4966642~4966739	UUUGUUUAUUGCUCUGGUUGU
novelMiR_2398	-6.28	1	chrIV+4997014~4997111	GCUGUCGGUGGAGCACCAACUG
novelMiR_2399	-5.93	1	chrIV+4996958~4997055	GCUGUCGGUGGAGCACCAACUG
novelMiR_24	-5.92	1	chrI+472691~472788	UUCGGCAAUUUCGGCAAUUG
novelMiR_240	-7.95	1	chrI+3018260~3018357	AGGACGGCUGGAUCACGC
novelMiR_2400	-4.89	1	chrIV+5016959~5017056	AUCGGGAGCUUCAACCAUGACC
novelMiR_2401	-5.53	1	chrIV+5016903~5017000	AUCGGGAGCUUCAACCAUGACC
novelMiR_2402	-8.52	1	chrIV+5055743~5055840	UUUGGGUCGAGAACUCCACAU
novelMiR_2404	-3.56	3	chrIV+5173995~5174092	AUUUAGGCACGUCGCAGGCGC
novelMiR_2405	-7.62	1	chrIV+5219263~5219360	CGCUGUGGAGAUUCGUUCCCA
novelMiR_2406	-7.62	1	chrIV+5227322~5227419	CGCUGUGGAGAUUCGUUCCCA
novelMiR_2407	-6.57	1	chrIV+5239595~5239692	AUGUCAGGUGCUGUUAGGCGUUU
novelMiR_2408	-2.76	3	chrIV+5239966~5240063	UUUCACCCAACUCUUGCCAAAC
novelMiR_2409	-1.8	3	chrIV+5240086~5240183	UGGCAAGAGUUGGGUGAAACUU
novelMiR_241	-6.65	2	chrI+3027579~3027676	CAAUUUGUCGAUUUGCCGGAAU
novelMiR_2410	-3.19	1	chrIV+5249526~5249630	CUCAUCGGCUCGCCGUAUUGG
novelMiR_2411	1.06	8	chrIV+5251145~5251242	UUUGGCAAGAGUUGGGUGAAA
novelMiR_2412	-2.89	2	chrIV+5260677~5260782	ACUCAUCUGCUCGCCGUAUUG
novelMiR_2413	-2.89	2	chrIV+5265626~5265731	ACUCAUCUGCUCGCCGUAUUG
novelMiR_2414	-3.19	1	chrIV+5298051~5298155	CUCAUCGGCUCGCCGUAUUGG
novelMiR_2415	-8.88	2	chrIV+5307829~5307926	GGAGCGAAUCGCUGAUUGGUCAC
novelMiR_2416	-3.19	1	chrIV+5308532~5308636	CUCAUCGGCUCGCCGUAUUGG
novelMiR_2418	-8.87	152	chrIV+5352597~5352694	UCUUUCGGUCGAUAGGUUGAC
novelMiR_2419	-5.31	1	chrIV+5356203~5356300	AGAGAACGGAGAGGAUGAUG
novelMiR_2420	-5.09	1	chrIV+5368975~5369072	UGGGGGAAGCGGAGUGUGUUUGA
novelMiR_2421	-6.41	1	chrIV+5373901~5373998	GUUACUAUCGUCACAGGCUCCGA
novelMiR_2424	-2.27	8	chrIV+5565261~5565358	AGGCGUCGUCGGCAACCG
novelMiR_2425	-6.19	1	chrIV+5582855~5582952	AUUGGCUGAAAUGUGGGCGGAGC
novelMiR_2426	-8.45	1	chrIV+5611747~5611844	UUCUUCAGACCAUGCCCCAUCUG
novelMiR_2427	-6.37	1	chrIV+5650823~5650920	AUAUCGCCGUGGCAACUG
novelMiR_2428	-5.3	3	chrIV+5765881~5765978	UGACGCCUGACCAUUUGUAGA
novelMiR_2429	-6.4	1	chrIV+5772379~5772476	UGACGGCCGAGGUAGAUG
novelMiR_243	-8.29	3	chrI+3106957~3107054	GAAAAUUGCGAUUUGCCGGAAGU
novelMiR_2432	-6.13	2	chrIV+5845107~5845204	GUCUUCGAGUCCGGACGAACCC
novelMiR_2433	-8.58	3	chrIV+5869684~5869781	UGUUGAUCUCCAGAAAUUGCGCU
novelMiR_2434	-3.15	1	chrIV+5950076~5950173	GGCGUCCGGUCGUCCGACUUGG
novelMiR_2435	-8.12	17	chrIV+5965010~5965107	AUCUACCUGUUGAACUUGACUCC
novelMiR_2436	-8.66	1	chrIV+5971438~5971535	UCCACUGAUGACGUUACAAUCU
novelMiR_2437	-3.93	1	chrIV+5978075~5978172	ACAAGGCGCCAAUCCAGAUGUGG
novelMiR_2438	-4.53	2	chrIV+5986029~5986126	CACCCUCAGAUCGUUGAAGAU
novelMiR_2439	-7.11	2	chrIV+5992426~5992502	GCAGGAAUGGUUGCCGGAGGA
novelMiR_244	-4.09	1	chrI+3107211~3107308	AAUUUGCUGGUUUGCCGAUUGC
novelMiR_2441	-8.35	1	chrIV+6010233~6010330	UUUACGGCCGUGGAUUUCCUCCU
novelMiR_2442	-1.8	3	chrIV+6033854~6033951	UGGCAAGAGUUGGGUGAAACUU
novelMiR_2443	-7.86	1	chrIV+6101764~6101861	UUCAUAACGAGACUUUUCAAA
novelMiR_2444	-8.94	1	chrIV+6120222~6120319	AGAAGAAGGCGAUGAGAAAUGUU
novelMiR_2445	-7.93	16	chrIV+6162921~6163018	UUUGUCGACGUUAUGGAAAGU
novelMiR_2446	-4	16	chrIV+6162864~6162961	UUUGUCGACGUUAUGGAAAGU
novelMiR_2448	-0.72	69	chrIV+6294557~6294640	UCUGGAUCGAUAAUGUAAACCU
novelMiR_2449	-8.32	1	chrIV+6320221~6320318	CGCGGGUGAUGACAGAAAC
novelMiR_245	-5.25	1	chrI+3151435~3151532	GUGGAUUGCCUUCGCUGUAGAA
novelMiR_2450	-6.79	1	chrIV+6320237~6320334	UCUCGUCUCCCGUUUCUGUCAUC
novelMiR_2451	-7.98	1	chrIV+6324500~6324597	ACCACUGGAGAGGGCUGUAAAUU
novelMiR_2452	-4.93	3	chrIV+6326532~6326629	GUACAUGAAUCGGAUGGUGAACG
novelMiR_2453	-5.04	11	chrIV+6340438~6340535	CUUGAAUACAGUUGUGACGUAAU
novelMiR_2455	-4.25	1	chrIV+6593332~6593429	UUCGGCAAUUUCGGCAAUUG
novelMiR_2456	-7.89	2	chrIV+6648873~6648970	GGGUGCACCACUCGGAAAG
novelMiR_2457	-4.87	2	chrIV+6738287~6738384	AUCUCACCGUCCAUCGACUUU
novelMiR_2458	-5.18	1	chrIV+6761218~6761315	CGAGAAAGCGAUCUACGACC
novelMiR_2459	-3.42	2	chrIV+6791796~6791888	AUCGGAGUCUGCUGGAGGAGUU
novelMiR_246	-8.44	1	chrI+3161085~3161182	GUUCACGAGUCGGCGAGAGAAC
novelMiR_2460	-4.67	11	chrIV+6803380~6803477	CUUGAAUACAGUUGUGACGUAAU
novelMiR_2461	-5.63	2	chrIV+6902044~6902141	ACCCAGGUCGCUAGGUCG
novelMiR_2462	-6.28	1	chrIV+6904805~6904902	AACCUAGUGCGUCGUUCAACGG
novelMiR_2463	-6.37	1	chrIV+6906791~6906888	UUGAGCAACAACGUCAACGGCU
novelMiR_2464	-6.26	1	chrIV+6907617~6907714	GAAGGUCGCGUCUCGGAGCAGCU
novelMiR_2465	-6.99	1	chrIV+6914536~6914633	GCCUGAUAUUGGUUGGUCCCC
novelMiR_2466	-5.48	1	chrIV+6972608~6972697	UCAGAGUGUCUCAUUUCGGUU
novelMiR_2467	-8.03	1	chrIV+7012360~7012457	GACGUCACAACUGUAUUAAAAU
novelMiR_2468	-5.58	1	chrIV+7040329~7040426	GAAGAUUGUCGAGGAUUGUGU
novelMiR_2469	-9.03	1	chrIV+7048029~7048126	AGAGACGAAGAUGAUCGAGGCA
novelMiR_247	-8.8	1	chrI+3161418~3161515	GGAGUCGGCUUGGAGUAUC
novelMiR_2470	-8.04	1	chrIV+7112079~7112176	AUCGGGAGCUUCAACCAUGACC
novelMiR_2471	-5.53	1	chrIV+7112023~7112120	AUCGGGAGCUUCAACCAUGACC
novelMiR_2472	-6.07	2	chrIV+7112158~7112255	CCAUGACUGCUGUUGGCGGAGCU
novelMiR_2473	-7.98	1	chrIV+7115414~7115511	AGAAAACUGUGGAAAAUUUGAGA
novelMiR_2474	-8.11	3	chrIV+7135816~7135913	GAGGAUGGACGAGUAACUUGAG
novelMiR_2479	-4.75	1	chrIV+7320099~7320196	UCUGUUCUGCGGCUGUUCCUCGU
novelMiR_248	-8	1	chrI+3171641~3171721	UGAACGGCCAGAGUCACUAAAUU
novelMiR_2480	-6.8	1	chrIV+7387708~7387805	UCAAAACUUUGAUCCGCCGUAAC
novelMiR_2484	-4.87	2	chrIV+7619550~7619647	AGUAGUACUUUGCCGACGCAGGG
novelMiR_2485	-3.48	4	chrIV+7657975~7658072	UCACAUCGAUAUUCGGAAUCA
novelMiR_2486	-4.12	3	chrIV+7662263~7662360	UAAUUCGCCGUUUGUAAAUGC
novelMiR_2488	-7.87	1	chrIV+7810747~7810844	AUUUCGAAAUUUGCCGCACACG
novelMiR_2489	-8.27	1	chrIV+7847225~7847322	UCAGUGACGGCUCCUCCAUCAGA
novelMiR_249	-8	1	chrI+3171862~3171959	UCACUAAAUUUGGUGAACGGCC
novelMiR_2490	-7.12	2	chrIV+7874607~7874704	UCUUCUCGAUGGAGAUCUCGCU
novelMiR_2491	-4.2	1	chrIV+8096490~8096587	CUUUCCCUUAGCGUCCUCCUUCU
novelMiR_2492	-7.07	2	chrIV+8209981~8210078	CGUCUGCCGGCCUGGAAC
novelMiR_2493	-7.82	1	chrIV+8233421~8233518	AUCUUGUUCUCCGACUGCCC
novelMiR_2494	-5.3	1	chrIV+8307156~8307253	CUUUCUUUUGAGUUCUGGAUAUU
novelMiR_2495	-5.59	1	chrIV+8335601~8335698	GGCCUUUCCUCCGGUCUUGGCUU
novelMiR_2496	-6.25	1	chrIV+8429967~8430064	GUUGUGGUUGCUGUUGAUGC
novelMiR_2498	-6.48	1	chrIV+8482515~8482612	CACUUUCCGCUGAUGCUCUUCUU
novelMiR_2499	-4.22	1	chrIV+8571522~8571619	CUCAUCGGCUCGCCGUAUUGG
novelMiR_25	-4	1	chrI+509962~510059	UGAUUGGUCGUGCAGUUCUAAU
novelMiR_250	-8.54	1	chrI+3171806~3171903	UCACUAAAUUUGGUGAACGGCC
novelMiR_2500	-6.51	1	chrIV+8571685~8571782	ACUGUUGAGUGGACCAAC
novelMiR_2501	-5.67	2	chrIV+8749557~8749645	UAUUUAAAAGUCGAUGGACGGC
novelMiR_2502	-9.03	1	chrIV+8782393~8782490	UUGUGUUGCCUCGCUUUCCUGC
novelMiR_2503	-7.76	1	chrIV+8782337~8782434	UUGUGUUGCCUCGCUUUCCUGC
novelMiR_2504	-5.22	1	chrIV+8877067~8877164	AAAGGUGGUAGAAAGGUGGCAA
novelMiR_2506	-8.27	1	chrIV+8902078~8902175	AAGAGACCACGCUCUGGCCGCC
novelMiR_2507	-5.35	1	chrIV+8903266~8903363	CGGAGAUUGGGCGAGUGGAGCG
novelMiR_2509	-8.48	1	chrIV+8921383~8921480	GAGGAAAUGAGGUGGAUUGACUC
novelMiR_2510	-5.7	1	chrIV+8927469~8927566	CGUAUUGGAGCUGGAGGG
novelMiR_2511	-7.82	3	chrIV+9029730~9029827	CGAGAUAUGGCCUCUGAAGCA
novelMiR_2512	-7.85	1	chrIV+9048614~9048711	UUGUAAGGAUUUCCCACUA
novelMiR_2513	-4.57	1	chrIV+9101743~9101840	GACCGGGCGAACGAUGAUCUCC
novelMiR_2514	-8.41	1	chrIV+9204701~9204798	AUUAUUGGGAGAGUGCGGAUUUG
novelMiR_2515	-5.22	2	chrIV+9240428~9240525	ACUGUAGGGGUACUGUAGGAGUA
novelMiR_2516	-6.29	1	chrIV+9316962~9317059	AAGUUGAAGACGCGGAGAAGA
novelMiR_2517	-7.9	1	chrIV+9388832~9388929	CGGUGUUGACGAAGGAAC
novelMiR_2518	-8.15	1	chrIV+9524634~9524731	GCAGCAUCCCGUGGAAUUUGUU
novelMiR_2519	-4.04	1	chrIV+9689095~9689192	CUCAUCGGCUCGUCGUAUUG
novelMiR_252	-5.64	1	chrI+3208791~3208888	UUUGCGCGUAAAUUCUGAUGU
novelMiR_2520	-6.37	1	chrIV+9689041~9689138	CUCAUCGGCUCGUCGUAUUG
novelMiR_2521	-6.4	1	chrIV+9741049~9741146	GCGUGUUCAACCGAUUAGAGGC
novelMiR_2522	-7.46	1	chrIV+9741056~9741153	GAUUGGUUGGCCACGCCU
novelMiR_2523	-4.41	1	chrIV+9759501~9759598	UUGGAGGAAGUUUGAUUAGGGAG
novelMiR_2525	-6.41	1	chrIV+9853059~9853156	CGCUGUCGGUGGGGCGCC
novelMiR_2526	-3.13	1	chrIV+9852999~9853096	CGCUGUCGGUGGGGCGCC
novelMiR_2528	-5.57	1	chrIV+10030106~10030203	UUGCGAGAUAGCGGCCCGUCACU
novelMiR_2529	-6.76	1	chrIV+10095509~10095582	CUCAUCGGCUCGUCGUAUUG
novelMiR_253	-7.81	1	chrI+3231191~3231288	UUCGGAUAUUUUCUAAUAAUGA
novelMiR_2530	-7.98	1	chrIV+10145252~10145349	AACAGAGGAAUUGGAUUGGGGCU
novelMiR_2531	-8.64	1	chrIV+10162907~10163004	UGACCGUCGCUGAGCUGCUCA
novelMiR_2532	-4.9	2	chrIV+10163320~10163417	AACGAUCCACGUCAUCCUGC
novelMiR_2533	-8.51	1	chrIV+10182689~10182786	AUCAACAGAAACCAGGAACUC
novelMiR_2534	-8.2	1	chrIV+10244626~10244723	AGAGCCGCUUACGGAACUGCA
novelMiR_2536	-8.33	1	chrIV+10322528~10322625	CCGUUUCCGGUCCGUAGACG
novelMiR_2537	-4.2	7	chrIV+10345363~10345460	UAGGCAUGAUCUCUAGACCAGA
novelMiR_2538	-8.46	1	chrIV+10370585~10370682	GACUCGUAUUGGCGUCGGAU
novelMiR_2539	-5.38	1	chrIV+10371279~10371376	CGUCUUGUUCGCGAUCGU
novelMiR_254	-5.25	1	chrI+3235506~3235603	AGCCACUGGACGAUGUAGUUGC
novelMiR_2540	-7.84	1	chrIV+10377685~10377782	GCUGGUGCCAAGAUUGAAGAGCU
novelMiR_2541	-7.31	1	chrIV+10385288~10385385	GCUUGGGGAGGAUUGUUUU
novelMiR_2542	-6.58	1	chrIV+10422405~10422502	UUCGGCCGUCCGUCCUCCCGGCU
novelMiR_2544	-6.28	1	chrIV+10499613~10499710	GGUUUUCCAGUCCGCCGGUCGU
novelMiR_2546	-8.9	1	chrIV+10613945~10614042	GAGUAUUCGAGGGUCGGGCG
novelMiR_2547	-9.03	1	chrIV+10672058~10672155	AGAGAAUCUAUGGGAGGAA
novelMiR_2548	-7.63	1	chrIV+10673248~10673345	AUAUCUGGAGAAUCAUGCUCACC
novelMiR_2549	-8.28	1	chrIV+10673622~10673719	UGCACAUGCCGUCCUGGAG
novelMiR_255	-8.93	1	chrI+3246569~3246666	GGUGGCCUGUAGGAGAGA
novelMiR_2551	-7.81	1	chrIV+10744172~10744269	AAGAUGGAAUAGAGCUGGUGCU
novelMiR_2552	-6.54	1	chrIV+10754139~10754236	CGGAGCAAAUCGCUGAUUGGUC
novelMiR_2553	-9.03	1	chrIV+10822156~10822253	UUAGAAGCAUGAAGCUGGGCGCC
novelMiR_2554	15.86	33	chrIV+10856088~10856169	UUGGUUCAGGAAUGGGCGGAACU
novelMiR_2555	-4.64	1	chrIV+10934260~10934357	CCCUAUGGGCUUUAGAGACUA
novelMiR_2556	-4.07	1	chrIV+10945657~10945754	UCUGAUCCUUCGGAGCUGAAGGA
novelMiR_2557	-6.23	1	chrIV+10945696~10945793	UCGGAGCUGAAGGAUCAG
novelMiR_2558	-2.28	1	chrIV+10946116~10946233	UCGGAGCUGAAGGAUCAG
novelMiR_2559	-6.15	17	chrIV+10994143~10994240	AAAAUCAUCGAAACUGCAGGGAU
novelMiR_256	-4.4	1	chrI+3247119~3247216	AAAUUUUUGUUCCCGUCGCC
novelMiR_2560	-6.53	1	chrIV+11002713~11002810	CCAUAUUGGAUUAGAUUUCGACC
novelMiR_2561	-3.57	1	chrIV+11002658~11002755	CCAUAUUGGAUUAGAUUUCGACC
novelMiR_2562	-7.34	1	chrIV+11025990~11026087	CAUGGAUAGGAGCUACGGGUAGA
novelMiR_2563	-6.84	1	chrIV+11033631~11033728	GCCGGUAUUCUGUCAGGACU
novelMiR_2564	-6.43	1	chrIV+11033789~11033886	GCCGGUAUUCUGUCAGGACU
novelMiR_2565	-6.84	1	chrIV+11033868~11033965	GCCGGUAUUCUGUCAGGACU
novelMiR_2566	-8.2	1	chrIV+11034184~11034281	GCCGGUAUUCUGUCAGGACU
novelMiR_2567	-6.84	1	chrIV+11034500~11034597	GCCGGUAUUCUGUCAGGACU
novelMiR_2568	-6.36	1	chrIV+11034658~11034755	GCCGGUAUUCUGUCAGGACU
novelMiR_2569	-6.84	1	chrIV+11034974~11035071	GCCGGUAUUCUGUCAGGACU
novelMiR_257	-8.08	1	chrI+3251610~3251707	GAUAUUUGCCGAUUUGCCGAACU
novelMiR_2570	-6.43	1	chrIV+11035132~11035229	GCCGGUAUUCUGUCAGGACU
novelMiR_2571	-6.43	1	chrIV+11035369~11035466	GCCGGUAUUCUGUCAGGACU
novelMiR_2572	-6.85	1	chrIV+11035448~11035545	GCCGGUAUUCUGUCAGGACU
novelMiR_2573	-6.36	1	chrIV+11035764~11035861	GCCGGUAUUCUGUCAGGACU
novelMiR_2574	-6.84	1	chrIV+11035843~11035940	GCCGGUAUUCUGUCAGGACU
novelMiR_2575	-4.82	4	chrIV+11038869~11038950	CGUCGCCAGUGCUCUUCCGGUGA
novelMiR_2576	-7.62	1	chrIV+11083118~11083215	GUGUGGACGUGAGUGAACU
novelMiR_2578	-7.36	1	chrIV+11131436~11131533	GUUGCGAAGGAGAUCGGAGGA
novelMiR_258	-6.06	1	chrI+3272823~3272920	UAGGCUUAGGCUUAGGUUUAGGC
novelMiR_2581	-5.99	2	chrIV+11205911~11206008	UCGCUUGGUCCUCUCAGACG
novelMiR_2582	-8.9	5	chrIV+11282687~11282784	CUCGGCAUUUGGAGGCAACUUCC
novelMiR_2583	-7.29	1	chrIV+11287968~11288065	CCAGAAGUUGGAGAUCAAGAAG
novelMiR_2584	-5.59	1	chrIV+11324313~11324410	GGCCUUUCCUCCGGUCUUGGCUU
novelMiR_2585	-6.69	2	chrIV+11335085~11335182	GAUGGGCGAUGAGAGAAAUC
novelMiR_2586	-7.73	1	chrIV+11362633~11362730	UUGGAACCAAUUGAUUUGAGCUU
novelMiR_2587	-9.05	2	chrIV+11376012~11376109	AUCAGUACAAGGUUGCCGGACU
novelMiR_2589	-7.36	1	chrIV+11406626~11406723	GAAUGGUGCUCUGCGGAUGAG
novelMiR_2590	-8.2	1	chrIV+11411369~11411466	GCAAGUUCUGUUCCUUGAGGAU
novelMiR_2591	-7.12	2	chrIV+11419023~11419120	UCUUCUCGAUGGAGAUCUCGCU
novelMiR_2593	-3.36	4	chrIV+11496501~11496598	UAGUUCUACCUAGAUCUGACUAG
novelMiR_2594	-5.22	1	chrIV+11524869~11524945	GGCAUCUGCAGACGUGGAAGU
novelMiR_2595	-8.41	1	chrIV+11527146~11527243	GCCGUGACAGAUUCUGGACU
novelMiR_2596	-5.2	1	chrIV+11527190~11527287	GACGGAGGUCGAUGCAAGACA
novelMiR_2597	-6.18	1	chrIV+11542625~11542714	ACUCGGACCGUCAGAAAAAGAA
novelMiR_2598	-6.5	1	chrIV+11566055~11566152	GUUGAGGAUAUCCGGGCAUUUGC
novelMiR_2599	5.34	2	chrIV+11609307~11609415	CCGCCCACAGUUCUGUACCUUGC
novelMiR_26	-3.89	1	chrI+511547~511644	GUUGGCGUGAGAAGAUCAUUCU
novelMiR_260	-3.48	1	chrI+3332310~3332407	CAAUUUUGAGAUUUGCCGCACA
novelMiR_2601	-4.8	1	chrIV+11681381~11681478	GCAGCACUAAUAGAGAAUAUACG
novelMiR_2602	2.9	3	chrIV+11684364~11684456	UGGUGUCAGACUGUUCCAUAAC
novelMiR_2603	-4.02	2	chrIV+11722056~11722153	CAUUGGAAGAAAAGAGAACGAGA
novelMiR_2604	-8.43	1	chrIV+11764082~11764179	AAAUUUCGAACUUUGCCGCACA
novelMiR_2605	-7.42	1	chrIV+11821589~11821686	CUUCUCGGAUCCCUCGGUCUUU
novelMiR_2606	-7.1	2	chrIV+11828170~11828267	UGCACACCGUCAAGUCGCCUGC
novelMiR_2607	-1.88	2	chrIV+11855500~11855585	AGCGCUUCGAACUUGACUUGAUC
novelMiR_2609	-6.51	1	chrIV+11871441~11871538	UCUCUCUCUCUCUCUCUCUACC
novelMiR_261	-5.18	1	chrI+3344673~3344770	GUAGCUGUUGGUGCUCUGGGG
novelMiR_2610	-7.4	1	chrIV+11882974~11883071	GCGAAGCAAUGAUUGGCCAGA
novelMiR_2612	-4.71	1	chrIV+12075184~12075281	UUGGGCAAAAGUUGGGCAAGA
novelMiR_2613	-6.7	1	chrIV+12075127~12075224	UUGGGCAAAAGUUGGGCAAGA
novelMiR_2615	3.25	3	chrIV+12239795~12239907	UGCCUACUUUCUCCCACCUUUUU
novelMiR_2616	-8.43	1	chrIV+12314001~12314098	AAAUUACGUCACGACUGUA
novelMiR_2617	-4.41	1	chrIV+12371273~12371370	GAAAAGAAAUGUCGGAAGCGAUC
novelMiR_2618	-4.47	1	chrIV+12427767~12427864	CUGGGGCUCCUGGUGCUC
novelMiR_2619	-7.41	1	chrIV+12430369~12430466	UGCUGGCAGGAAGUUGCCGAGU
novelMiR_262	-7.96	1	chrI+3368084~3368181	CCGCGGAGACUGUCGAUAUCC
novelMiR_2620	0.2	2	chrIV+12451870~12451949	UUUGGAAUCAAGUCGACGCAAUC
novelMiR_2621	-3.89	1	chrIV+12453055~12453152	CACUUUUCCGAUUGUUCCAACUA
novelMiR_2624	-3.83	240	chrIV+12490255~12490352	UUUAAAACCGUGCGGCAGUUGC
novelMiR_2627	-8.35	1	chrIV+12561540~12561637	GCAGCGGCUGGAAUUUCG
novelMiR_2628	-7.85	1	chrIV+12576010~12576107	UCUUUGAGGGUCCUGGAACAGAA
novelMiR_2629	-4.44	1	chrIV+12603219~12603316	AAUUUUCGGAAUUGCCGGAAU
novelMiR_263	-7.03	1	chrI+3375097~3375194	GUCCAAUCGUUUUCGUGAGCCG
novelMiR_2630	-4.32	1	chrIV+12603455~12603552	AAUUUUCGGAAUUGCCGGAAU
novelMiR_2631	-4.43	1	chrIV+12710181~12710278	UAAUGGGACAGCCUGGCACCACG
novelMiR_2632	-6.03	1	chrIV+12726798~12726895	UUCGGCAAUUUCGGCAAUUG
novelMiR_2633	-4.35	1	chrIV+12727058~12727155	UGCCGGUUUUGUGAAUUU
novelMiR_2634	-6.94	1	chrIV+12727112~12727209	UUCGGCAAUUUCGGCAAUUG
novelMiR_2635	-7.43	2	chrIV+12738998~12739095	UUCGGCAAUCGAAUUUUCGGC
novelMiR_2636	-4.75	1	chrIV+12806519~12806616	GGUACGUUUUAUGUUGAUUGGC
novelMiR_2637	-8.53	2	chrIV+12816706~12816783	UCGUUUUGCCCUCCGGUCGGC
novelMiR_2638	-8.8	1	chrIV+12816885~12816982	GUCCAUCCAUCGUCGGAAAGA
novelMiR_264	-7.67	1	chrI+3375382~3375479	GCCCGGUGGCCGACUCGAACC
novelMiR_2640	-5.7	1	chrIV+13013833~13013930	CCCGUGAGGUGUCGGCUGC
novelMiR_2641	-4.49	1	chrIV+13078581~13078678	AUAGACGGAAGGCAGGCAUGC
novelMiR_2642	-5.12	1	chrIV+13087864~13087961	CGAUGGGAGAGUCGAAGGAUGU
novelMiR_2643	-8.38	1	chrIV+13090137~13090234	UCCGUCAUCUCCAGGGGC
novelMiR_2644	-8.99	1	chrIV+13090077~13090174	UCCGUCAUCUCCAGGGGC
novelMiR_2645	-5.4	4	chrIV+13097137~13097234	CGAUCGAGUUGGGCCUGGGUG
novelMiR_2646	-5.76	4	chrIV+13188841~13188938	AAUUCCUGGCUCUCUCGGACCG
novelMiR_2647	-9.01	1	chrIV+13188910~13189007	GUGUAUGGCCCGGUGUGCUU
novelMiR_2648	-3.57	1	chrIV+13293295~13293392	UUCGCAAGCCUCGCACGUUUUU
novelMiR_2649	0.83	17	chrIV+13302155~13302252	UCUCGCCGUCCAUCGACUUUAA
novelMiR_265	-4.43	1	chrI+3402232~3402329	AGGAUUAGGCUCAGGCUUAGGC
novelMiR_2650	-5.59	1	chrIV+13305139~13305236	AAACGAAACAACGAAGCUCCGA
novelMiR_2651	-7.15	1	chrIV+13324379~13324476	CUACUGAGGAUCGUGUCAA
novelMiR_2652	-8.13	1	chrIV+13364138~13364235	AUCGCCGAUCGCCGAUUGC
novelMiR_2653	-3.23	1	chrIV+13382560~13382657	AGCGUUUGUGUCGAUUUACGGG
novelMiR_2654	-4.64	9	chrIV+13400016~13400088	GACCAACAGCAUGCGGCACUGA
novelMiR_2655	-7.6	2	chrIV+13400287~13400384	UUGGGUUGUGGUGGGAGG
novelMiR_2656	-7.46	1	chrIV+13407412~13407509	UAAAUCGACACAAGCUCUACAGU
novelMiR_2657	-6.14	1	chrIV+13408624~13408721	UUACCUAUCGCCUUUAAAUGUAC
novelMiR_2658	-6.99	4	chrIV+13421873~13421954	UAAAUUGCCGAUUUGCCGGAAGU
novelMiR_2659	-6.19	1	chrIV+13448106~13448203	GUGGUCGGCGAUUUCCAGUAGA
novelMiR_266	-3.64	3	chrI+3411038~3411127	UCUCACCGUCCAUCGACUUUAA
novelMiR_2660	-7.65	1	chrIV+13476508~13476605	AAUUGCCGGUUCUGGAAAUUUCC
novelMiR_2661	-8.27	1	chrIV+13494321~13494418	CAAUUUGCCAAUUUGCCGGAAAU
novelMiR_2662	-1.29	2	chrIV+13506421~13506518	ACUGUAGCGCUUGUGUGUC
novelMiR_2663	-6.28	1	chrIV+13522370~13522467	UCGACUUUGACUUUUUGGAAAA
novelMiR_2664	-4.94	1	chrIV+13535476~13535573	CUGACUCUAAUUUUGCCC
novelMiR_2665	2.21	92	chrIV+13658190~13658287	CCGCGCGCCGCUAUGUUUAACU
novelMiR_2666	1.18	46	chrIV+13743434~13743531	UUACCUAUCGGCUUUAAAUGUA
novelMiR_2667	-6.65	1	chrIV+13784679~13784764	CGGAAUGCGACAGAAGCUG
novelMiR_2669	-6.49	8	chrIV+13900153~13900250	UGAGGAUGGUAUUUAAUAUUA
novelMiR_267	-6.79	1	chrI+3423231~3423328	ACGCGGCUCACGACUCAAUUGUC
novelMiR_2670	-7.86	1	chrIV+13952028~13952125	GGAGCGAGUCGCUGAUUGGUC
novelMiR_2671	-7.53	1	chrIV+13973507~13973604	CUGCGGAGCAACGACUUGAGC
novelMiR_2672	-5.77	1	chrIV+14044754~14044851	ACUUGAGCAAGUCGAGGAUGGAC
novelMiR_2673	-4.33	1	chrIV+14063302~14063399	GAUCAGGUCCACCGUGUUCCGA
novelMiR_2674	-5.67	1	chrIV+14064000~14064097	UGAUCGCCGAUCGCCGAAAU
novelMiR_2675	-7.53	1	chrIV+14067425~14067522	AAUGGGUCUCGCCACGCUGACA
novelMiR_2676	-2.82	3	chrIV+14185561~14185658	UAAGUCGCAUGAGCACCUUCUGA
novelMiR_2677	-4.88	3	chrIV+14217558~14217655	CGGACGCGGAGCCAAGUUUGC
novelMiR_2678	-3.25	77	chrIV+14247395~14247492	UAGGCUUCGCAGUAGAUUAAG
novelMiR_2679	-4.54	77	chrIV+14247338~14247435	UAGGCUUCGCAGUAGAUUAAG
novelMiR_268	-7.53	1	chrI+3433588~3433685	GCAUCGAAGUUCGGGCUGAAGU
novelMiR_2680	-8.57	1	chrIV+14247394~14247491	AAAUUGACUGAGCCAUGGC
novelMiR_2681	-5.49	1	chrIV+14272759~14272856	AAAAGGAGAGAGAAGAAGCUGA
novelMiR_2682	-6.75	2	chrIV+14272821~14272918	UAGAUGGUGGUGGUGGGCU
novelMiR_2683	-7.68	1	chrIV+14311618~14311715	GUUCGAUGCGAGGUUCCGGGCU
novelMiR_2685	-6.96	1	chrIV+14330305~14330402	AUUUCGAAAUUUGCCGCACACG
novelMiR_2686	-8.41	1	chrIV+14391917~14392014	CUGUUUUGGGUGGCUGCU
novelMiR_2687	-5.5	1	chrIV+14486692~14486789	ACAGACGAAAAAUAGAUUGA
novelMiR_2688	4.3	4	chrIV+14515205~14515284	UGUCCAAGGUCUGUCAGCUUAUC
novelMiR_2689	-7.88	20	chrIV+14599953~14600050	UAUGACUUGCGUUGAUUUGGU
novelMiR_269	-8.14	1	chrI+3436281~3436378	GACAUCAUGUAUUCGGCGGCGA
novelMiR_2690	-8.2	1	chrIV+14618747~14618844	CGAGGAAGCUGGAACACACACC
novelMiR_2691	-8.59	1	chrIV+14638351~14638448	UUCGAGAGCCCUGGAAGAU
novelMiR_2692	0.39	93	chrIV+14648182~14648279	CCGCGCGCCGCUAUGUUUAACU
novelMiR_2693	-7.79	1	chrIV+14765891~14765988	GACCGAUUGUUUCACGUUGACU
novelMiR_2694	-7.18	1	chrIV+14790234~14790331	GACUCGGCGGACGAGGAGAAGGC
novelMiR_2695	-8.35	1	chrIV+14838552~14838649	UCGAAAACUUUAAAGAGCAUUC
novelMiR_2696	-3.51	1	chrIV+14859056~14859153	UCCCGUCGAAUUUGUGCUGAAA
novelMiR_2697	-7.9	1	chrIV+14870216~14870313	UUGUUUUUUCAGAAUUUCGAGC
novelMiR_2698	-0.43	17	chrIV+14873383~14873480	UCUGCAAAAUUCAAGGAUCGAU
novelMiR_2699	-4.63	1	chrIV+14891875~14891962	GCAUGCCACUGGGGGCUCGGAA
novelMiR_27	-7.53	1	chrI+513624~513721	GAGCGAUGACGCAGUCGUUUUG
novelMiR_270	-8.87	1	chrI+3442800~3442874	UUCGGCAAUUUCGGCAAUUG
novelMiR_2700	-3.25	77	chrIV+14947456~14947553	UAGGCUUCGCAGUAGAUUAAG
novelMiR_2701	-8.57	1	chrIV+14947455~14947552	AAAUUGACUGAGCCAUGGC
novelMiR_2702	-6.53	1	chrIV+14952991~14953088	UUUGUAUAAAUGCGCGCGCCU
novelMiR_2703	-5.13	1	chrIV+14958431~14958528	CAUUUUGAGCAAUUUCGCCGGA
novelMiR_2706	-6.81	6	chrIV+14997111~14997208	UACGUCACAACUGUAUUCAAGU
novelMiR_2708	-6	1	chrIV+15022362~15022459	UUUCGGAUGAUGAAGCUGGGGA
novelMiR_2709	1.76	6	chrIV+15030718~15030851	AAAAUCUCGCCGUCCAUCGACU
novelMiR_271	-6.9	1	chrI+3443010~3443107	UUCGGCAAUUUCGGCAAUUG
novelMiR_2710	-6.55	1	chrIV+15037354~15037451	UCAUUUGGAUGCUGCUCUUGGAG
novelMiR_2711	-4.01	1	chrIV+15041719~15041816	GAAUGAUCGGGCUUCCACCA
novelMiR_2712	-7.66	2	chrIV+15044366~15044463	GUUUCUCACUCGCGUCGACGGC
novelMiR_2713	-8.09	61	chrIV+15069411~15069508	UGUUCGAGACAUCGUGGAAAA
novelMiR_2714	-7.19	11	chrIV+15117941~15118038	UUCAGAUUUUGGACUACGAUC
novelMiR_2716	-6.18	3	chrIV+15182402~15182499	AAUGGGCGGAGCUAAUCGCUGAU
novelMiR_2717	-7.57	1	chrIV+15234490~15234587	UUAUUUCUAGAAGUCUUACUAU
novelMiR_2718	-4.51	6	chrIV+15359012~15359109	AUGUUUAACUCGCAGCGGGC
novelMiR_2719	-0.39	86	chrIV+15390232~15390332	UAAACAUAGCGGCGCGCGGAACC
novelMiR_272	-6.93	1	chrI+3442952~3443049	UUCGGCAAUUUCGGCAAUUG
novelMiR_2720	-4.21	1	chrIV+15409634~15409731	UGAACGGCCAGAGUCACUAAAUU
novelMiR_2721	-7.03	1	chrIV+15447202~15447299	GUUCGAGACCUUCUCCGCUGAC
novelMiR_2722	-4.56	1	chrIV+15460681~15460778	CGCACAAAAAGUUGAAUUUUGGA
novelMiR_2723	-1.99	1	chrIV+15525047~15525144	GAAAAAACGUGCGAGGCU
novelMiR_2724	-7.64	53	chrIV+15658599~15658696	UGGGAAGUUUGGUCUUACGGC
novelMiR_2726	-6.18	3	chrIV+15688648~15688745	AAUCAGUUGGUGCAGUGGACCU
novelMiR_2727	1.8	7	chrIV+15691934~15692031	AUGUUUAACUCGCAGCGGGC
novelMiR_2728	-7.91	3	chrIV+15716222~15716319	UGGUUUGUAGACGUUGCCUGCG
novelMiR_2729	-2.4	3	chrIV+15716166~15716263	UGGUUUGUAGACGUUGCCUGCG
novelMiR_273	-4.61	1	chrI+3443063~3443160	UGCCGGUUUUGUGAAUUU
novelMiR_2730	-6.71	1	chrIV+15776050~15776147	AUUUCGAAAUUUGCCGCACACG
novelMiR_2731	-7.48	1	chrIV+15826849~15826946	ACCCAUCGUUGUGAGACCCAUCG
novelMiR_2732	-5.88	1	chrIV+15854132~15854229	CCUGGGGCCUGGGGUCGGGCUGC
novelMiR_2733	-7.42	1	chrIV+15940122~15940219	ACUCCCGCACUCCCGUGCGCCCG
novelMiR_2734	-6.78	2	chrIV+15943297~15943394	GUCUUCGAGUCCGGACGAACCC
novelMiR_2735	-6.89	1	chrIV+16036804~16036901	GCAUCGUUGAUUGGUCGGGGAA
novelMiR_2737	-8.19	1	chrIV+16169347~16169444	CCUAAAUAUUAGGUUUUCUG
novelMiR_2738	-2.97	1	chrIV+16233727~16233824	GGAACCCCGAAAGUGUCGGCC
novelMiR_2739	-7.16	1	chrIV+16260966~16261063	UUGGAACCAAUUGAUUUGAGCUU
novelMiR_274	-7.66	1	chrI+3443150~3443224	UUCGGCAAUUUCGGCAAUUG
novelMiR_2740	-3.9	1	chrIV+16404769~16404866	UGUCUCAUUGCGGUUUGAUCU
novelMiR_2741	-0.91	46	chrIV+16407486~16407569	UUACCUAUCGGCUUUAAAUGUA
novelMiR_2742	-3.54	3	chrIV+16412706~16412803	UGAAAAAUCGUGGAAAAUUGAUU
novelMiR_2743	-6.46	1	chrIV+16469105~16469202	GGGGGUCACGUUGAAUUGUAA
novelMiR_2744	-8.01	1	chrIV+16483197~16483294	UUUAGGAGAAAACGGAAUUUUUU
novelMiR_2745	-7.15	3	chrIV+16490266~16490363	UUCGGCUUGAUCUACGUUGAUC
novelMiR_2746	-3.86	1	chrIV+16491734~16491831	AGAGAGAAAGAGCAGGACGAGAC
novelMiR_2747	2.97	8	chrIV+16492248~16492336	UCAGCGUCCGCCGCCGCCGAGA
novelMiR_2748	-7.96	1	chrIV+16535819~16535916	GUAACUCUAAGCCCAUCAACUU
novelMiR_2749	-6.78	801	chrIV+16557090~16557187	UUUAGAUCAGUGCUGUGCGGC
novelMiR_275	-4.29	1	chrI+3443255~3443352	UUCGGCAAUUUCGGCAAUUG
novelMiR_2750	-6.87	1	chrIV+16574695~16574792	AUCGGUGAAAAACACAAGAAAAC
novelMiR_2751	-8.73	17	chrIV+16577939~16578036	UGAAUAGGCUGGCUUGAUGGA
novelMiR_2752	-3.35	108	chrIV+16580624~16580721	ACGUUUUCGCCUGUAACUCCGA
novelMiR_2753	-4.25	1	chrIV+16585955~16586042	AUUCUGGAAUGUUCUAGAACCU
novelMiR_2754	-6.43	1	chrIV+16586099~16586196	AUUCUGGAAUGUUCUAGAACCU
novelMiR_2755	2.18	1	chrIV+16586221~16586308	AUUCUGGAAUGUUCUAGAACCU
novelMiR_2756	-4.83	1	chrIV+16593161~16593258	UCGAGAGGGAAUUUUUCGCGGGU
novelMiR_2757	-5.81	1	chrIV+16615266~16615363	AUUCUGGAAUGUUCUAGAACCU
novelMiR_2758	-4.57	1	chrIV+16615216~16615313	AUUCUGGAAUGUUCUAGAACCU
novelMiR_2759	-7.11	15	chrIV+16649723~16649820	CUUGGCGGCGGAACAUCUCUUC
novelMiR_276	-6.03	1	chrI+3443197~3443294	UUCGGCAAUUUCGGCAAUUG
novelMiR_2760	-7.45	1	chrIV+16651703~16651800	GAUGAUGAUGCUGCUGCUGCUG
novelMiR_2761	-6.77	2	chrIV+16653119~16653216	GGAGGAUCUUCUGGAGCAGC
novelMiR_2762	-7.16	1	chrIV+16653273~16653370	GAGUCGGUGAGCGGAGCAAGU
novelMiR_2764	-2.4	77	chrIV+16746185~16746282	UAGGCUUCGCAGUAGAUUAAG
novelMiR_2765	-7.75	1	chrIV+16746184~16746281	AAAUUGACUGAGCCAUGGC
novelMiR_2766	61.16	93	chrIV+16808792~16808895	CCGCGCGCCGCUAUGUUUAACU
novelMiR_2767	-8.16	4	chrIV+16883174~16883271	UGUGGUGCGCGGACCUCGAA
novelMiR_2769	-2.1	3	chrIV+17092807~17092904	AGUGGGCCGAGCGAUUCGCUGA
novelMiR_277	-4.25	1	chrI+3443430~3443527	UUCGGCAAUUUCGGCAAUUG
novelMiR_2770	-3.27	1	chrIV+17104283~17104380	CGGAGCAAAUCGCUGAUUGGUC
novelMiR_2771	-4.59	1	chrIV+17110150~17110247	AACGAGAGGAUCGGCGUUCACG
novelMiR_2772	-0.53	2	chrIV+17140940~17141017	GACCCGUCGUGGCGAGACC
novelMiR_2773	-2.43	7	chrIV+17216787~17216884	CGUGGAGCUCGGGACCAUCGCCC
novelMiR_2774	-0.43	1	chrIV+17268777~17268858	AUGGGUUGAAAGCAGUGCAAUGU
novelMiR_2775	-5.72	1	chrIV+17269301~17269398	CACCAAGGACGCCCUCAUCGC
novelMiR_2776	-7.32	1	chrIV+17288410~17288507	GUCUUGGUCUUCGGUAUCUGCUG
novelMiR_2777	-6.68	1	chrIV+17376699~17376796	AUUUCGAAAUUUGCCGCACACG
novelMiR_278	-6.19	1	chrI+3443372~3443469	UUCGGCAAUUUCGGCAAUUG
novelMiR_2780	-2.52	2	chrV+100741~100838	UUAUUUCGGAGCUUCGUUGUUUC
novelMiR_2781	-3.11	2	chrV+121980~122077	UACGGGCUUGAUUUUCGAAAU
novelMiR_2782	-7.03	1	chrV+128576~128673	UUUGGGAAAAGUCGGUCAGG
novelMiR_2783	-3.01	1	chrV+173259~173356	CGAAAAGAAAAAUGGACGGCAUA
novelMiR_2784	-7.23	1	chrV+174653~174750	AAUCGCUGAUUGGUCGCAG
novelMiR_2785	-1.95	4	chrV+188847~188944	UACCUAUCGGCUUUAAAUGUAC
novelMiR_2786	-5.31	1	chrV+192226~192323	UAAGGUAUUUAAAAGUCGAUGGA
novelMiR_2787	-5.66	1	chrV+196458~196555	CGAUUUGCCGAAUUUGCCGGAAA
novelMiR_2788	-8.14	7	chrV+197388~197485	UGACGCGCAAAAUAUCUCGAAGC
novelMiR_279	-6.28	1	chrI+3443582~3443679	UUCGGCAAUUUCGGCAAUUG
novelMiR_2790	-6.54	1	chrV+255173~255270	CGUUCUGUAGAAAGUAUG
novelMiR_2791	2.16	46	chrV+306951~307048	UUACCUAUCGGCUUUAAAUGUA
novelMiR_2792	26.37	46	chrV+351399~351482	UUACCUAUCGGCUUUAAAUGUA
novelMiR_2793	-6.98	1	chrV+352001~352098	CGCUGUCGUCGAUAAUUGCCC
novelMiR_2794	-5.16	3	chrV+353450~353547	AGAUGGGCUUGGAAUGAGA
novelMiR_2797	-8.71	1	chrV+398260~398357	UUGGCUCUAGCUUCUUGCCCAAG
novelMiR_2798	-5.29	1	chrV+442106~442203	UCAGAGUGUCUCAUUUCGGUU
novelMiR_2799	-4.04	1	chrV+446299~446396	AACACCUCCCUCCAAAUGUCGGU
novelMiR_28	-6.09	2	chrI+515484~515581	AAUGGCAGAUCAAAAUUUCGGA
novelMiR_280	-3.95	1	chrI+3446654~3446751	UUUCUGAACAAUUUUUUCGAU
novelMiR_2800	-7.02	1	chrV+484549~484646	AAAAUUGGUGGUAGUGGGAUU
novelMiR_2801	-3.6	1	chrV+574107~574204	CGCUUUUUGGGCCAAUGGGGACG
novelMiR_2802	-5.65	2	chrV+600251~600348	UUUCACCCAACUCUUGCCAAAC
novelMiR_2803	-6.08	1	chrV+670610~670707	GUUUUGUCGUACAUUCCGGACU
novelMiR_2804	-5.22	1	chrV+690383~690480	AAUCGACACAAAUCGUCUCUUCC
novelMiR_2806	-8.94	1	chrV+775555~775652	AAUCUGCCGAUUUGCCGGAAA
novelMiR_2807	-4.49	1	chrV+777814~777911	GUAGGCAUGUAGGCAUAUA
novelMiR_2808	-8.45	1	chrV+795330~795427	GUACGUUCUCAGUUCUUUGACG
novelMiR_2809	-3.35	1	chrV+838622~838719	GCCUGAAAGUUGCCGUUUGCC
novelMiR_281	-7.09	1	chrI+3451619~3451716	CGCCAAUACCUAACGAGAC
novelMiR_2810	-5.53	1	chrV+907272~907369	AGCGUUUGUGUCGAUUUACGGG
novelMiR_2811	-6.8	1	chrV+918875~918972	GGUUCGGCAACUUCGGCAAUUG
novelMiR_2812	-2.84	2	chrV+940280~940377	UACGGGCUCGAUUUUCGAAA
novelMiR_2813	-4.12	1	chrV+940434~940531	UAAAUCGACACAAGAGCU
novelMiR_2814	-8.16	1	chrV+946030~946127	AAUCGCUGAUUGGUCGCAG
novelMiR_2815	-4.39	1	chrV+963685~963782	UAAGGUAUUUAAAAGUCGAUGGA
novelMiR_2816	2.56	2	chrV+966811~966890	UUUUUGGUCGAUGCGGGCACA
novelMiR_2817	-7.53	1	chrV+980461~980558	AAAUUAAAUUCUGCUGCCAAGA
novelMiR_2818	-3.48	1	chrV+983251~983348	UGAUUGGUUCAAAAGUGGGCGG
novelMiR_2819	-6.27	6	chrV+989705~989802	UACGUCACAACUGUAUUCAAGU
novelMiR_282	-4.88	1	chrI+3451728~3451825	CGAUUUGCCGAAUUUGCCGGAAA
novelMiR_2820	-6.7	2	chrV+996131~996228	UUUUGAAGACUUUUUCGGCU
novelMiR_2821	-2.76	2	chrV+1006966~1007063	UUUUUGGUCGAUGCGGGCACA
novelMiR_2822	26.64	46	chrV+1007976~1008073	UUACCUAUCGGCUUUAAAUGUA
novelMiR_2823	-4.48	1	chrV+1008578~1008675	UUGUGAUCGCCGAUCGCCGAAA
novelMiR_2824	-8.69	1	chrV+1008522~1008619	UUGUGAUCGCCGAUCGCCGAAA
novelMiR_2825	-7.45	1	chrV+1010640~1010737	GGUACAGACGCGAGAGUUGGAGU
novelMiR_2826	-1.49	5	chrV+1015327~1015424	CGCCCACUGUCGAACCAAUC
novelMiR_2828	-7.26	1	chrV+1096913~1097010	CAAAUCUCGCCGUCCAUCGACU
novelMiR_2829	-2.55	6	chrV+1151612~1151709	AUUUUCGCGUCUCGUUUCUCUGA
novelMiR_283	-0.95	7	chrI+3476889~3476986	UAAAUUGCCGAUUUGCCGGAAAU
novelMiR_2830	-5.59	6	chrV+1151558~1151655	AUUUUCGCGUCUCGUUUCUCUGA
novelMiR_2832	-7.73	1	chrV+1156647~1156744	ACGGCGAUGGCACAAUCACC
novelMiR_2833	-7.5	1	chrV+1169953~1170050	UAGGCUUAGGCUUAGGUUUAGGC
novelMiR_2835	-8.45	1	chrV+1187419~1187516	CGGAAAAUUGCCGAUUUGCCGGA
novelMiR_2836	-5.85	2	chrV+1193821~1193918	CAAUUUGUCGAUUUGCCGGAAU
novelMiR_2838	-2.55	13	chrV+1201011~1201133	UGGUGUCAGGCUGUCUCAUUGC
novelMiR_2839	-3.9	1	chrV+1230010~1230107	UUAGGCUUGGGCUUGGGC
novelMiR_2840	-4.1	1	chrV+1229950~1230047	UUAGGCUUGGGCUUGGGC
novelMiR_2841	-8.82	1	chrV+1233981~1234078	UUCGUGGGCGCGCUGACGAUC
novelMiR_2842	-4.28	1	chrV+1256432~1256514	UCCGGAAUGGUCCAGAAUUUUCU
novelMiR_2843	-3.74	1	chrV+1257207~1257304	UCCGGAAUGGUCCAGAAUUUUCU
novelMiR_2844	-4.16	1	chrV+1257879~1257976	UCCGGAAUGGUCCAGAAUUUUCU
novelMiR_2845	-4.46	1	chrV+1258039~1258136	UCCGGAAUGGUCCAGAAUUUUCU
novelMiR_2846	-6.05	1	chrV+1258104~1258201	UCCGGAAUGGUCCAGAAUUUUCU
novelMiR_2847	-4.2	1	chrV+1258818~1258915	GAGUACGCCAGUCGGAGCAC
novelMiR_2848	-2.74	3	chrV+1331283~1331380	UAAGUCGCAUGAGCACCUUCUGA
novelMiR_2849	-3.04	1	chrV+1331852~1331949	CGAAAAGAAAAAUGGACGGCAUA
novelMiR_285	-6.09	1	chrI+3531381~3531478	UAGGCAAGACUUGGGCAAAACUU
novelMiR_2850	-6.47	7	chrV+1332097~1332194	AACACGUGGUGUCAGGCUGUCC
novelMiR_2851	-7.48	1	chrV+1339974~1340071	UUUGCCGAGCUCGUAGAAAUA
novelMiR_2852	-3.44	1	chrV+1342548~1342645	CAAACAGCGACUUUCAGGCACU
novelMiR_2853	-4.16	1	chrV+1352609~1352706	AUUCUGGAAUGUUCUAGAACCU
novelMiR_2854	-2.15	4	chrV+1372196~1372293	UACGGGCUUGAUUUUCGAAAU
novelMiR_2855	-2.27	5	chrV+1374523~1374620	AAUAGACGGGAAAUAAUGUAAA
novelMiR_2856	-6.75	1	chrV+1375242~1375339	GACACGCGUGGAUGUGAUGGA
novelMiR_2857	-7.92	5	chrV+1377129~1377226	CAAUUUGUCAAUUUGCCGGAAAU
novelMiR_2859	-2.61	4	chrV+1384466~1384563	UACGGGCUUGAUUUUCGAAAU
novelMiR_286	-4.79	2	chrI+3563208~3563305	UGCGCCUUCAAAGAGUACUGU
novelMiR_2860	-3.56	1	chrV+1394062~1394159	UGUCCCAUGACGGUUUGAUCU
novelMiR_2861	-4.33	1	chrV+1473194~1473291	CCAUCGGCUCAAAAAGUGUCUCA
novelMiR_2862	-7.5	2	chrV+1473403~1473500	UUUUCGAAUUUUGGCCGGCCA
novelMiR_2863	-5.6	1	chrV+1474744~1474841	GUUGUUGGGGCUGGGGGU
novelMiR_2864	-5.37	1	chrV+1479239~1479336	CUCCGAGAUGUCGGACCUCGAC
novelMiR_2865	-7.84	1	chrV+1571201~1571298	AUCACGUGGUGUCAGAGUGUGC
novelMiR_2866	-4.32	5	chrV+1576169~1576266	UUUUGAACGGAACCGAAGCUGU
novelMiR_2867	-8.44	1	chrV+1589733~1589830	UUGUGAUCGCCGAUCGCCGAAA
novelMiR_2868	-8.82	1	chrV+1602517~1602614	AAUUUGUCGGUUUGCCGG
novelMiR_2869	-6.21	1	chrV+1620698~1620795	UCUCUCUUCUCCACACGCUCUCU
novelMiR_287	-8.85	2	chrI+3603042~3603139	UUCCAGCAAUUUGCCGAUUUGCC
novelMiR_2870	-1.7	7	chrV+1689060~1689157	CUUUGGCAUGAGGAUCUGGACAA
novelMiR_2872	-5.33	4	chrV+1712348~1712445	UAAAUUGCCGAUUUGCCGGAAGU
novelMiR_2873	-2.59	4	chrV+1712293~1712390	UAAAUUGCCGAUUUGCCGGAAGU
novelMiR_2874	-3.03	7	chrV+1712733~1712830	UAAAUUGCCGAUUUGCCGGAAAU
novelMiR_2875	-0.91	7	chrV+1712678~1712775	UAAAUUGCCGAUUUGCCGGAAAU
novelMiR_2876	-2.87	7	chrV+1712835~1712932	UAAAUUGCCGAUUUGCCGGAAAU
novelMiR_2877	-0.6	7	chrV+1712780~1712877	UAAAUUGCCGAUUUGCCGGAAAU
novelMiR_2878	-3.7	7	chrV+1712903~1713000	UAAAUUGCCGAUUUGCCGGAAAU
[truncated: 4,793 more rows]

## Sheet: 243 miRNAs
miRNA	mirDeep score	Read counts	Location	Sequence
novelMiR_1914	720.38	1033	chrIII+11829137~11829222	UGGGCGGAGCGAAUCGAUGAUU
novelMiR_979	1.74	233	chrII+6943884~6943986	AAAGAGACUCAUUGGGCCUGCUC
novelMiR_921	83.8	141	chrII+4058306~4058386	UCGACCCUUGUGCCUGUUUCGGU
novelMiR_1774	2.41	103	chrIII+9408488~9408611	GUUUUUGCUGAUCUCUCUUCU
novelMiR_2766	61.16	93	chrIV+16808792~16808895	CCGCGCGCCGCUAUGUUUAACU
novelMiR_1309	2.35	93	chrII+14773319~14773451	CCGCGCGCCGCUAUGUUUAACU
novelMiR_6545	2.1	93	chrIV-16722391~16722485	CCGCGCGCCGCUAUGUUUAACU
novelMiR_6517	1.91	93	chrIV-15713751~15713865	CCGCGCGCCGCUAUGUUUAACU
novelMiR_6523	62.77	92	chrIV-16169238~16169342	CCGCGCGCCGCUAUGUUUAACU
novelMiR_53	62.57	92	chrI+788660~788791	CCGCGCGCCGCUAUGUUUAACU
novelMiR_2665	2.21	92	chrIV+13658190~13658287	CCGCGCGCCGCUAUGUUUAACU
novelMiR_2216	47.68	87	chrIV+2078999~2079092	AUGGCCUAGUGGAUAAGAGGGA
novelMiR_7569	2.59	86	chrX-16341862~16341977	UAAACAUAGCGGCGCGCGGAACC
novelMiR_5795	1.85	85	chrIII-12091754~12091851	UAGAAACUCUCAAUUCCGGCAGA
novelMiR_7022	37.22	78	chrV-14656522~14656607	UGCCUUCUUUCCUUGUGUCGCCG
novelMiR_6376	1.57	78	chrIV-11026109~11026198	UGUACUCGGUUGUGUGCGGGCCU
novelMiR_5932	2.37	75	chrIII-13259200~13259327	AUUGGUGAUGACUGCUCUAGCA
novelMiR_210	35.89	72	chrI+2538603~2538682	CGCGGGACUAGUCAAGUGUCGGC
novelMiR_576	1.86	71	chrI+12055309~12055406	ACGCCGAAAUGAGACACUCUGAC
novelMiR_179	55.81	69	chrI+2076510~2076597	GAUUUUUCGAUCAUUGGGGCAC
novelMiR_3811	2.26	66	chrX+16341885~16341982	CCGCGCGCCGCUAUGUUUAACU
novelMiR_5070	1.8	66	chrII-13333682~13333779	GAAUCGUAGCGCGUGUUGUUUA
novelMiR_6149	36.37	63	chrIV-3233224~3233338	GAUGAGAUGCGAAGAGUAGGGCA
novelMiR_6012	39.64	59	chrIV-1021418~1021506	UAAGACAGCGGGCUCCACUACA
novelMiR_6962	34.11	55	chrV-11225516~11225601	AGACUUACUGUAGUUUUCGCCA
novelMiR_2057	26.08	48	chrIII+13259227~13259321	UGGCGAUGAGUGCUCUAGCAAGA
novelMiR_2822	26.64	46	chrV+1007976~1008073	UUACCUAUCGGCUUUAAAUGUA
novelMiR_5714	26.39	46	chrIII-11177193~11177276	UUACCUAUCGGCUUUAAAUGUA
novelMiR_629	26.39	46	chrI+13584252~13584335	UUACCUAUCGGCUUUAAAUGUA
novelMiR_6589	26.39	46	chrV-351395~351478	UUACCUAUCGGCUUUAAAUGUA
novelMiR_1859	26.37	46	chrIII+11177197~11177280	UUACCUAUCGGCUUUAAAUGUA
novelMiR_2792	26.37	46	chrV+351399~351482	UUACCUAUCGGCUUUAAAUGUA
novelMiR_4476	26.37	46	chrI-13584248~13584331	UUACCUAUCGGCUUUAAAUGUA
novelMiR_3949	26.28	46	chrI-1386680~1386777	UUACCUAUCGGCUUUAAAUGUA
novelMiR_108	26.26	46	chrI+1386670~1386767	UUACCUAUCGGCUUUAAAUGUA
novelMiR_4967	26.24	46	chrII-12129182~12129265	UUACCUAUCGGCUUUAAAUGUA
novelMiR_1887	26.22	46	chrIII+11498457~11498540	UUACCUAUCGGCUUUAAAUGUA
novelMiR_5883	26.16	46	chrIII-12708489~12708572	UUACCUAUCGGCUUUAAAUGUA
novelMiR_5921	25.93	46	chrIII-13088130~13088213	UUACCUAUCGGCUUUAAAUGUA
novelMiR_4980	25.81	46	chrII-12263455~12263538	UUACCUAUCGGCUUUAAAUGUA
novelMiR_1348	25.78	46	chrII+15222348~15222431	UUACCUAUCGGCUUUAAAUGUA
novelMiR_239	25.61	46	chrI+3017334~3017417	UUACCUAUCGGCUUUAAAUGUA
novelMiR_4108	25.61	46	chrI-3002162~3002245	UUACCUAUCGGCUUUAAAUGUA
novelMiR_7190	25.58	46	chrV-20096624~20096707	UUACCUAUCGGCUUUAAAUGUA
novelMiR_2040	25.25	46	chrIII+13088134~13088217	UUACCUAUCGGCUUUAAAUGUA
novelMiR_3453	23.29	46	chrX+251544~251627	UUACCUAUCGGCUUUAAAUGUA
novelMiR_5880	2.22	46	chrIII-12701706~12701803	UUACCUAUCGGCUUUAAAUGUA
novelMiR_3571	2.17	46	chrX+5511040~5511137	UUACCUAUCGGCUUUAAAUGUA
novelMiR_2791	2.16	46	chrV+306951~307048	UUACCUAUCGGCUUUAAAUGUA
novelMiR_1982	2.12	46	chrIII+12460792~12460889	UUACCUAUCGGCUUUAAAUGUA
novelMiR_1334	2.08	46	chrII+15112840~15112937	UUACCUAUCGGCUUUAAAUGUA
novelMiR_1328	2.06	46	chrII+15045486~15045583	UUACCUAUCGGCUUUAAAUGUA
novelMiR_5874	1.94	46	chrIII-12623028~12623125	UUACCUAUCGGCUUUAAAUGUA
novelMiR_3430	1.92	46	chrX+4648~4745	UUACCUAUCGGCUUUAAAUGUA
novelMiR_7223	1.92	46	chrX-15898~15995	UUACCUAUCGGCUUUAAAUGUA
novelMiR_7133	1.91	46	chrV-18209626~18209723	UUACCUAUCGGCUUUAAAUGUA
novelMiR_6098	1.74	46	chrIV-2506316~2506413	UUACCUAUCGGCUUUAAAUGUA
novelMiR_7499	1.62	46	chrX-14460923~14461020	UUACCUAUCGGCUUUAAAUGUA
novelMiR_5304	1.53	46	chrIII-594514~594611	UUACCUAUCGGCUUUAAAUGUA
novelMiR_2223	1.51	46	chrIV+2183614~2183711	UUACCUAUCGGCUUUAAAUGUA
novelMiR_3876	1.5	46	chrI-514632~514729	UUACCUAUCGGCUUUAAAUGUA
novelMiR_6619	1.44	46	chrV-1007986~1008083	UUACCUAUCGGCUUUAAAUGUA
novelMiR_4968	1.33	46	chrII-12135334~12135431	UUACCUAUCGGCUUUAAAUGUA
novelMiR_3950	1.32	46	chrI-1387544~1387641	UUACCUAUCGGCUUUAAAUGUA
novelMiR_4043	1.31	46	chrI-2175585~2175682	UUACCUAUCGGCUUUAAAUGUA
novelMiR_7255	1.3	46	chrX-463613~463710	UUACCUAUCGGCUUUAAAUGUA
novelMiR_5814	1.25	46	chrIII-12247672~12247769	UUACCUAUCGGCUUUAAAUGUA
novelMiR_4362	1.24	46	chrI-11232174~11232271	UUACCUAUCGGCUUUAAAUGUA
novelMiR_5925	1.22	46	chrIII-13172207~13172304	UUACCUAUCGGCUUUAAAUGUA
novelMiR_1990	1.21	46	chrIII+12571823~12571920	UUACCUAUCGGCUUUAAAUGUA
novelMiR_2666	1.18	46	chrIV+13743434~13743531	UUACCUAUCGGCUUUAAAUGUA
novelMiR_7194	1.12	46	chrV-20261065~20261162	UUACCUAUCGGCUUUAAAUGUA
novelMiR_2029	1.11	46	chrIII+12899322~12899419	UUACCUAUCGGCUUUAAAUGUA
novelMiR_7407	1.1	46	chrX-7764657~7764754	UUACCUAUCGGCUUUAAAUGUA
novelMiR_2000	1.04	46	chrIII+12632614~12632711	UUACCUAUCGGCUUUAAAUGUA
novelMiR_2009	25.62	45	chrIII+12708493~12708575	UUACCUAUCGGCUUUAAAUGUA
novelMiR_2007	25.38	45	chrIII+12701710~12701792	UUACCUAUCGGCUUUAAAUGUA
novelMiR_5092	1.89	45	chrII-13558935~13559032	UUACCUAUCGGCUUUAAAUGUA
novelMiR_4497	2.18	44	chrI-13745557~13745654	CCGUGAUGGGACAGCCUGACACC
novelMiR_1243	2.07	44	chrII+13741527~13741624	UUGGCUGAAAAGUGGGCGGUGCU
novelMiR_3496	1.21	44	chrX+1993432~1993553	GCCAGAGACGUCGGUUCGAAUCC
novelMiR_7294	1.21	44	chrX-1994199~1994320	GCCAGAGACGUCGGUUCGAAUCC
novelMiR_3938	29.3	43	chrI-1259114~1259195	UUACCUAUCGGCUUUAAAUGUA
novelMiR_1121	25.3	43	chrII+12263445~12263540	UUACCUAUCGGCUUUAAAUGUA
novelMiR_5236	25.23	43	chrII-15222346~15222441	UUACCUAUCGGCUUUAAAUGUA
novelMiR_3626	1.87	43	chrX+9075001~9075098	UUACCUAUCGGCUUUAAAUGUA
novelMiR_3634	1.42	43	chrX+9883163~9883260	UUACCUAUCGGCUUUAAAUGUA
novelMiR_4870	24.42	34	chrII-8877419~8877496	CAGACUACGAUCGCUACCGGGU
novelMiR_2554	15.86	33	chrIV+10856088~10856169	UUGGUUCAGGAAUGGGCGGAACU
novelMiR_6880	1.2	32	chrV-7661049~7661146	UGACAGGAGGUAGUAGGCCAAG
novelMiR_5777	23.33	31	chrIII-11936806~11936891	ACUCGAGGCCGGUGAGCUGCGU
novelMiR_4603	12.58	31	chrII-434826~434909	GAUGGCUGGAAUAUCGGUAUUC
novelMiR_207	1.79	30	chrI+2493437~2493534	UGCAAAUGAAAUCGUGGGCGGGG
novelMiR_2045	1.61	30	chrIII+13142310~13142407	UGCAAAUGAAAUCGUGGGCGGGG
novelMiR_4584	15.86	28	chrII-18627~18708	ACUGCUCAAAGGACUUUGCUGC
novelMiR_773	15.75	28	chrII+18627~18708	ACUGCUCAAAGGACUUUGCUGC
novelMiR_5841	23.54	27	chrIII-12420284~12420374	UGGGCGGAGCGAGUCGCUGAUU
novelMiR_1408	15.19	26	chrIII+498758~498835	AUACCCAACUUUGGUCUGCUAAA
novelMiR_1409	15.19	26	chrIII+498944~499021	AUACCCAACUUUGGUCUGCUAAA
novelMiR_5290	1.46	26	chrIII-492832~492940	AUACCCAACUUUGGUCUGCUAAA
novelMiR_5264	1.32	26	chrIII-346627~346724	AUACCCAACUUUGGUCUGCUAAA
novelMiR_5285	1.17	26	chrIII-470463~470561	AUACCCAACUUUGGUCUGCUAAA
novelMiR_5287	1.17	26	chrIII-481719~481796	AUACCCAACUUUGGUCUGCUAAA
novelMiR_7410	12.3	24	chrX-7882706~7882786	UGAACAUCAUUCAGGGCAUUAC
novelMiR_4154	16.43	22	chrI-3632116~3632194	UAUCGCACUCUUUGCCCUUCCG
novelMiR_1090	1.17	22	chrII+11603482~11603579	UUCGAGACAGUUUUUGAGCAACU
novelMiR_6754	5.6	21	chrV-3688812~3688889	ACACACAUCUGUCGUCGACGGCU
novelMiR_798	1.74	21	chrII+540640~540731	UUCAUGCGUGUAGAAAAAUGUA
novelMiR_405	16.41	20	chrI+7779820~7779953	CCGCCCACAGAACUGUACCUUGC
novelMiR_4263	16.41	20	chrI-7782005~7782138	CCGCCCACAGAACUGUACCUUGC
novelMiR_7005	16.04	20	chrV-13647893~13648002	CCGCCCACAGAACUGUACCUUGC
novelMiR_6564	18.95	19	chrIV-17247728~17247859	CUAAGAGAUAUCGCGCGUCAAAU
novelMiR_5685	13.33	19	chrIII-10568212~10568320	CUAAGAGAUAUCGCGCGUCAAAU
novelMiR_7118	12.31	19	chrV-18037598~18037679	UAGUUUGUAGCCUGGCAGACC
novelMiR_5980	2.73	19	chrIV-409764~409874	CGCCCACGAUUUCAUUUGCACUG
novelMiR_6795	2.3	19	chrV-4571306~4571403	ACAUUUAUGGUCAGUGGGGCACA
novelMiR_129	2.28	19	chrI+1576180~1576310	ACAUUUAUGGUCAGUGGGGCACA
novelMiR_3035	2.09	19	chrV+4571307~4571413	ACAUUUAUGGUCAGUGGGGCACA
novelMiR_7117	1.9	19	chrV-18037151~18037248	UAGUUUGUAGCCUGGCAGACC
novelMiR_4802	1.82	19	chrII-7023133~7023252	CGCCCACGAUUUCAUUUGCACUG
novelMiR_6858	1.81	19	chrV-6507848~6507966	CGCCCACGAUUUCAUUUGCACUG
novelMiR_6810	1.47	19	chrV-4820326~4820423	UCUUGAAUCCGUGGUGUCCCAA
novelMiR_3042	10.63	18	chrV+4649043~4649125	UCCCGAGCCUAUUUUUAUCGACU
novelMiR_5801	2.18	18	chrIII-12156421~12156518	UGGGCGGAGCGAGUCGCUGAUU
novelMiR_6711	1.71	18	chrV-2643187~2643284	UGGGCGGAGCGAGUCGCUGAUU
novelMiR_1831	2.4	17	chrIII+10568242~10568362	CUAAGAGAUAUCGCGCGUCAAA
novelMiR_6802	1.7	17	chrV-4694219~4694350	CAGAGUGUCCUAUUUCGGUUUGA
novelMiR_6409	1.69	17	chrIV-11696622~11696719	UUUCUGAAUAACUUCACGCGCC
novelMiR_221	1.21	17	chrI+2729354~2729451	UCUCGCCGUCCAUCGACUUUAA
novelMiR_6800	1.1	17	chrV-4651039~4651132	UAUAUCGUAUGCCUGCCGAAUC
novelMiR_7101	1	17	chrV-17961006~17961103	ACAUUUAUGGUCAGUGGGGCACA
novelMiR_290	13.45	16	chrI+3632118~3632196	UAUCGCACUCUUUGCCCUUCCG
novelMiR_2957	12.07	16	chrV+2851211~2851307	UGGGCAAGACUUUGGCAAAACU
novelMiR_7539	10.92	16	chrX-15447713~15447810	UGGGCAAGACUUUGGCAAAACU
novelMiR_6230	8.01	16	chrIV-4706035~4706122	GUGGGCGGCGCAAAUCUCUGAUU
novelMiR_3727	7.48	16	chrX+14917418~14917514	UGGGCAAGACUUUGGCAAAACU
novelMiR_7128	7.45	16	chrV-18102077~18102161	UGCAAUUUGUAAUUGAAGGCUC
novelMiR_1223	7.2	16	chrII+13515599~13515696	UGGGCAAGACUUUGGCAAAACU
novelMiR_7536	2.66	16	chrX-15387030~15387127	CGGACGGGAGCCAAGUUUGCACC
novelMiR_1953	2.45	16	chrIII+12163519~12163616	UCUCGCCGUCCAUCGACUUUAA
novelMiR_4097	2.31	16	chrI-2904521~2904618	UCUCGCCGUCCAUCGACUUUAA
novelMiR_1866	2.22	16	chrIII+11307238~11307335	UCUCGCCGUCCAUCGACUUUAA
novelMiR_4102	2.18	16	chrI-2926103~2926200	UCUCGCCGUCCAUCGACUUUAA
novelMiR_5806	2.18	16	chrIII-12163522~12163619	UCUCGCCGUCCAUCGACUUUAA
novelMiR_4324	2.16	16	chrI-10263842~10263939	UCUCGCCGUCCAUCGACUUUAA
novelMiR_3541	2.1	16	chrX+4202622~4202719	UCUCGCCGUCCAUCGACUUUAA
novelMiR_224	2.07	16	chrI+2761622~2761719	GUAAAUCGACACAAGCGGCU
novelMiR_5028	2.06	16	chrII-12971416~12971513	UCUCGCCGUCCAUCGACUUUAA
novelMiR_6785	2.04	16	chrV-4343506~4343603	UCUCGCCGUCCAUCGACUUUAA
novelMiR_5923	2.01	16	chrIII-13105189~13105293	UCUCGCCGUCCAUCGACUUUAA
novelMiR_2268	1.97	16	chrIV+2877284~2877381	UCUCGCCGUCCAUCGACUUUAA
novelMiR_2293	1.94	16	chrIV+3119931~3120028	UCUCGCCGUCCAUCGACUUUAA
novelMiR_5970	1.84	16	chrIV-211363~211460	UCUCGCCGUCCAUCGACUUUAA
novelMiR_5350	1.79	16	chrIII-1460463~1460560	UCUCGCCGUCCAUCGACUUUAA
novelMiR_6458	1.5	16	chrIV-13402337~13402434	UCUCGCCGUCCAUCGACUUUAA
novelMiR_116	1.4	16	chrI+1497563~1497660	UCUCGCCGUCCAUCGACUUUAA
novelMiR_4100	1.32	16	chrI-2918197~2918294	UCUCGCCGUCCAUCGACUUUAA
novelMiR_7243	1.14	16	chrX-249214~249311	UCUCGCCGUCCAUCGACUUUAA
novelMiR_5768	1.11	16	chrIII-11867125~11867223	UCUCGCCGUCCAUCGACUUUAA
novelMiR_1551	1.09	16	chrIII+2916986~2917083	UGGGCAAGACUUUGGCAAAACU
novelMiR_1100	8.68	15	chrII+11881676~11881760	CAAAUUGUCGAUUUGCCGGAAA
novelMiR_1101	7.39	15	chrII+11881787~11881871	CAAAUUGUCGAUUUGCCGGAAA
novelMiR_6378	2.18	15	chrIV-11034090~11034227	UUCUGGGGUCUCAUUAGGUUU
novelMiR_6380	2.18	15	chrIV-11034880~11035017	UUCUGGGGUCUCAUUAGGUUU
novelMiR_6381	2.1	15	chrIV-11035907~11036044	UUCUGGGGUCUCAUUAGGUUU
novelMiR_911	1.73	15	chrII+3942483~3942613	UUCUGGGGUCUCAUUAGGUUU
novelMiR_5692	1.72	15	chrIII-10703445~10703542	AAAAAUGUCUGCCUGCCUGCCU
novelMiR_3009	1.39	15	chrV+4146675~4146772	CAAAUUGUCGAUUUGCCGGAAA
novelMiR_3960	1.34	15	chrI-1500388~1500485	CAAAUUGUCGAUUUGCCGGAAA
novelMiR_5904	1.32	15	chrIII-12900538~12900635	CAAAUUGUCGAUUUGCCGGAAA
novelMiR_5937	9.61	14	chrIII-13317475~13317569	AAAUGAGAACUGCAGGACCAAUC
novelMiR_3445	16.07	13	chrX+105950~106038	UUACCGACUCGGCCAAUCUGC
novelMiR_4563	10.79	13	chrI-14633744~14633826	UACCGGAUUUUGUAAUGAGACG
novelMiR_5516	1.35	13	chrIII-4615960~4616057	UAACAGGGAUGAAGUAACGCC
novelMiR_1357	8.85	12	chrIII+9567~9648	AGUGUGUGGGGUGAGGCGAGACG
novelMiR_2019	8.58	12	chrIII+12740400~12740486	UCCGCCCACUUUUGAACCAAUC
novelMiR_6616	8.49	12	chrV-983267~983350	UCCGCCCACUUUUGAACCAAUC
novelMiR_2020	7.17	12	chrIII+12740702~12740789	UCCGCCCACUUUUGAACCAAUC
novelMiR_2940	2.52	12	chrV+2647790~2647887	UCCGCCCACUUUUGAACCAAUC
novelMiR_1505	2.06	12	chrIII+2324860~2324957	UCCGCCCACUUUUGAACCAAUC
novelMiR_5819	1.89	12	chrIII-12292806~12292903	AACAGACCCGCCUGAUGUCAG
novelMiR_7235	1.72	12	chrX-105954~106042	UUACCGACUCGGCCAAUCUGC
novelMiR_4363	1.39	12	chrI-11237101~11237211	GCAGGGGCACACAGAGACAGC
novelMiR_6714	1.17	12	chrV-2647997~2648094	UCCGCCCACUUUUGAACCAAUC
novelMiR_6899	6.06	11	chrV-8784544~8784639	UCCAUCUCUUCAUUCCCGCGCGA
novelMiR_3495	1.73	11	chrX+1982202~1982299	UUUUCGGUCGAUGCGGGCACA
novelMiR_3030	1.12	11	chrV+4499275~4499372	UUGCCCGUUUCUCUCUCUUUCGG
novelMiR_4076	7.51	10	chrI-2631675~2631793	GAAUGCGUUGAGUUCUGAGGCCU
novelMiR_1928	7.14	10	chrIII+11946406~11946485	AGGACUACACUGCGCGGGGGACU
novelMiR_3708	2.17	10	chrX+13993749~13993846	UCCGCGUCCGACACUUUUUGG
novelMiR_5162	1.55	10	chrII-14269245~14269342	UCAGCGUCCUCGAACUCCGCCC
novelMiR_5332	1.46	10	chrIII-1100564~1100661	UACAAAACUUUGAGCGGCCGUAA
novelMiR_3003	1.45	10	chrV+3997950~3998047	UCCGCGUCCGACACUUUUUGG
novelMiR_5851	1.39	10	chrIII-12507128~12507225	UCUCGCCGUCCAUCGACUUUAA
novelMiR_409	1.25	10	chrI+7837441~7837537	CUUCGCCCCGUGACUCAUCUGA
novelMiR_3899	11.19	9	chrI-788660~788786	GUUAAACAUAGCGGCGCGCGGA
novelMiR_3073	8.32	9	chrV+6276478~6276562	CGGAGGCGAUGUGAGAGGCGAUG
novelMiR_7244	7.79	9	chrX-251543~251637	UUACCUAUCGGCUUUAAAUGU
novelMiR_5742	7.38	9	chrIII-11498456~11498536	UUACCUAUCGGCUUUAAAUGU
novelMiR_1113	7.35	9	chrII+12129186~12129266	UUACCUAUCGGCUUUAAAUGU
novelMiR_4110	7.13	9	chrI-3017333~3017413	UUACCUAUCGGCUUUAAAUGU
novelMiR_237	7.09	9	chrI+3002166~3002246	UUACCUAUCGGCUUUAAAUGU
novelMiR_4035	5.55	9	chrI-2103556~2103635	UUACCUAUCGGCUUUAAAUGU
novelMiR_7508	2.23	9	chrX-14673319~14673400	UUCGGUCGAUGCGGGCACAAA
novelMiR_7293	1.81	9	chrX-1982185~1982282	UUCGGUCGAUGCGGGCACAAA
novelMiR_6618	1.57	9	chrV-1006947~1007044	UUCGGUCGAUGCGGGCACAAA
novelMiR_5266	7.89	8	chrIII-350886~350981	GAACUCUUGCCUAUCUUUGGCCC
novelMiR_2747	2.97	8	chrIV+16492248~16492336	UCAGCGUCCGCCGCCGCCGAGA
novelMiR_6695	2.49	8	chrV-2369766~2369903	AGGAAAACGCGCUCCAUGGUCA
novelMiR_6702	2.49	8	chrV-2477727~2477864	AGGAAAACGCGCUCCAUGGUCA
novelMiR_1949	2.04	8	chrIII+12120228~12120300	GGUUUGCCAAUUUGCCGGAAC
novelMiR_4985	1.83	8	chrII-12324039~12324130	AAUUGCCGAUUUGCCGAAUUUGC
novelMiR_416	1.26	8	chrI+7954962~7955091	UCUUCUUCUCCCUUCGUUUCCC
novelMiR_2916	1.25	8	chrV+2094512~2094609	UUUGGCAAGAGUUGGGUGAAA
novelMiR_7070	1.16	8	chrV-16901895~16901992	UUUGGCAAGAGUUGGGUGAAA
novelMiR_574	1.15	8	chrI+12045266~12045396	GACGGGCGAGAAGGCGGAU
novelMiR_5431	1.11	8	chrIII-2916985~2917082	UUUGGCAAGAGUUGGGUGAAA
novelMiR_2411	1.06	8	chrIV+5251145~5251242	UUUGGCAAGAGUUGGGUGAAA
novelMiR_6252	1.06	8	chrIV-5239965~5240062	UUUGGCAAGAGUUGGGUGAAA
novelMiR_6781	1	8	chrV-4217842~4217939	UUUGGCAAGAGUUGGGUGAAA
novelMiR_1740	13.67	7	chrIII+8021406~8021492	UUUUCGGGGUACGGUAUCUAAU
novelMiR_5616	12.92	7	chrIII-8021402~8021488	UUUUCGGGGUACGGUAUCUAAU
novelMiR_4204	7.03	7	chrI-5157227~5157313	AUGGGCGGAGCGAAUUGCUGAUU
novelMiR_7512	2.56	7	chrX-14715501~14715599	AUGUUUAACUCGCAGCGGGCG
novelMiR_4316	2.52	7	chrI-9787985~9788072	ACAAGCGUCGCUCGUUCCUCUCU
novelMiR_3013	2.4	7	chrV+4182676~4182768	AUGUUUAACUCGCAGCGGGC
novelMiR_2727	1.8	7	chrIV+15691934~15692031	AUGUUUAACUCGCAGCGGGC
novelMiR_1145	1.43	7	chrII+12706229~12706326	AUCUCGCCGUCCAUCGACUUUA
novelMiR_6757	7.39	6	chrV-3703752~3703831	UAAAUCGACACCAGCGCGCAC
novelMiR_3359	7.26	6	chrV+18712324~18712441	UAACUGCCAGCGGUCUGCCAACU
novelMiR_6079	6.91	6	chrIV-2189335~2189443	ACAUUUAUGGUCUUUGGGGCAC
novelMiR_6080	6.06	6	chrIV-2194877~2194974	ACAUUUAUGGUCUUUGGGGCAC
novelMiR_3941	5.65	6	chrI-1350379~1350476	ACAUUUAUGGUCUUUGGGGCAC
novelMiR_1421	5.58	6	chrIII+671318~671410	GACGUCGUCGUCCGUGUUUUCU
novelMiR_3281	5.3	6	chrV+17514396~17514476	UAACUGCCAGCGGUCUGCCAACU
novelMiR_6776	5.11	6	chrV-4165460~4165546	ACAUUUAUGGUCUUUGGGGCAC
novelMiR_688	5.07	6	chrI+14122722~14122799	AGGCUCAGAGACUACAAACUAC
novelMiR_3317	4.95	6	chrV+18037118~18037204	UUUGCGUAGUUUGUAGUCUAGC
novelMiR_6160	4.33	6	chrIV-3350767~3350841	UGCGUCUCCCCCUCCUCCACA
novelMiR_4016	3.89	6	chrI-1947709~1947795	ACAUUUAUGGUCUUUGGGGCAC
novelMiR_1447	3.65	6	chrIII+1250398~1250479	UCUCCCCUCCACCACGCUCUUU
novelMiR_1450	3.65	6	chrIII+1258758~1258839	UCUCCCCUCCACCACGCUCUUU
novelMiR_2709	1.76	6	chrIV+15030718~15030851	AAAAUCUCGCCGUCCAUCGACU

## Sheet: 64 miRNAs
miRNA	mirDeep score	Read counts	Location	Sequence
novelMiR_1914	720.38	1033	chrIII+11829137~11829222	UGGGCGGAGCGAAUCGAUGAUU
novelMiR_921	83.8	141	chrII+4058306~4058386	UCGACCCUUGUGCCUGUUUCGGU
novelMiR_2766	61.16	93	chrIV+16808792~16808895	CCGCGCGCCGCUAUGUUUAACU
novelMiR_6523	62.77	92	chrIV-16169238~16169342	CCGCGCGCCGCUAUGUUUAACU
novelMiR_53	62.57	92	chrI+788660~788791	CCGCGCGCCGCUAUGUUUAACU
novelMiR_2216	47.68	87	chrIV+2078999~2079092	AUGGCCUAGUGGAUAAGAGGGA
novelMiR_7022	37.22	78	chrV-14656522~14656607	UGCCUUCUUUCCUUGUGUCGCCG
novelMiR_210	35.89	72	chrI+2538603~2538682	CGCGGGACUAGUCAAGUGUCGGC
novelMiR_179	55.81	69	chrI+2076510~2076597	GAUUUUUCGAUCAUUGGGGCAC
novelMiR_6149	36.37	63	chrIV-3233224~3233338	GAUGAGAUGCGAAGAGUAGGGCA
novelMiR_6012	39.64	59	chrIV-1021418~1021506	UAAGACAGCGGGCUCCACUACA
novelMiR_6962	34.11	55	chrV-11225516~11225601	AGACUUACUGUAGUUUUCGCCA
novelMiR_2057	26.08	48	chrIII+13259227~13259321	UGGCGAUGAGUGCUCUAGCAAGA
novelMiR_2822	26.64	46	chrV+1007976~1008073	UUACCUAUCGGCUUUAAAUGUA
novelMiR_5714	26.39	46	chrIII-11177193~11177276	UUACCUAUCGGCUUUAAAUGUA
novelMiR_629	26.39	46	chrI+13584252~13584335	UUACCUAUCGGCUUUAAAUGUA
novelMiR_6589	26.39	46	chrV-351395~351478	UUACCUAUCGGCUUUAAAUGUA
novelMiR_1859	26.37	46	chrIII+11177197~11177280	UUACCUAUCGGCUUUAAAUGUA
novelMiR_2792	26.37	46	chrV+351399~351482	UUACCUAUCGGCUUUAAAUGUA
novelMiR_4476	26.37	46	chrI-13584248~13584331	UUACCUAUCGGCUUUAAAUGUA
novelMiR_3949	26.28	46	chrI-1386680~1386777	UUACCUAUCGGCUUUAAAUGUA
novelMiR_108	26.26	46	chrI+1386670~1386767	UUACCUAUCGGCUUUAAAUGUA
novelMiR_4967	26.24	46	chrII-12129182~12129265	UUACCUAUCGGCUUUAAAUGUA
novelMiR_1887	26.22	46	chrIII+11498457~11498540	UUACCUAUCGGCUUUAAAUGUA
novelMiR_5883	26.16	46	chrIII-12708489~12708572	UUACCUAUCGGCUUUAAAUGUA
novelMiR_5921	25.93	46	chrIII-13088130~13088213	UUACCUAUCGGCUUUAAAUGUA
novelMiR_4980	25.81	46	chrII-12263455~12263538	UUACCUAUCGGCUUUAAAUGUA
novelMiR_1348	25.78	46	chrII+15222348~15222431	UUACCUAUCGGCUUUAAAUGUA
novelMiR_239	25.61	46	chrI+3017334~3017417	UUACCUAUCGGCUUUAAAUGUA
novelMiR_4108	25.61	46	chrI-3002162~3002245	UUACCUAUCGGCUUUAAAUGUA
novelMiR_7190	25.58	46	chrV-20096624~20096707	UUACCUAUCGGCUUUAAAUGUA
novelMiR_2040	25.25	46	chrIII+13088134~13088217	UUACCUAUCGGCUUUAAAUGUA
novelMiR_3453	23.29	46	chrX+251544~251627	UUACCUAUCGGCUUUAAAUGUA
novelMiR_2009	25.62	45	chrIII+12708493~12708575	UUACCUAUCGGCUUUAAAUGUA
novelMiR_2007	25.38	45	chrIII+12701710~12701792	UUACCUAUCGGCUUUAAAUGUA
novelMiR_3938	29.3	43	chrI-1259114~1259195	UUACCUAUCGGCUUUAAAUGUA
novelMiR_1121	25.3	43	chrII+12263445~12263540	UUACCUAUCGGCUUUAAAUGUA
novelMiR_5236	25.23	43	chrII-15222346~15222441	UUACCUAUCGGCUUUAAAUGUA
novelMiR_4870	24.42	34	chrII-8877419~8877496	CAGACUACGAUCGCUACCGGGU
novelMiR_2554	15.86	33	chrIV+10856088~10856169	UUGGUUCAGGAAUGGGCGGAACU
novelMiR_5777	23.33	31	chrIII-11936806~11936891	ACUCGAGGCCGGUGAGCUGCGU
novelMiR_4603	12.58	31	chrII-434826~434909	GAUGGCUGGAAUAUCGGUAUUC
novelMiR_4584	15.86	28	chrII-18627~18708	ACUGCUCAAAGGACUUUGCUGC
novelMiR_773	15.75	28	chrII+18627~18708	ACUGCUCAAAGGACUUUGCUGC
novelMiR_5841	23.54	27	chrIII-12420284~12420374	UGGGCGGAGCGAGUCGCUGAUU
novelMiR_1408	15.19	26	chrIII+498758~498835	AUACCCAACUUUGGUCUGCUAAA
novelMiR_1409	15.19	26	chrIII+498944~499021	AUACCCAACUUUGGUCUGCUAAA
novelMiR_7410	12.3	24	chrX-7882706~7882786	UGAACAUCAUUCAGGGCAUUAC
novelMiR_4154	16.43	22	chrI-3632116~3632194	UAUCGCACUCUUUGCCCUUCCG
novelMiR_405	16.41	20	chrI+7779820~7779953	CCGCCCACAGAACUGUACCUUGC
novelMiR_4263	16.41	20	chrI-7782005~7782138	CCGCCCACAGAACUGUACCUUGC
novelMiR_7005	16.04	20	chrV-13647893~13648002	CCGCCCACAGAACUGUACCUUGC
novelMiR_6564	18.95	19	chrIV-17247728~17247859	CUAAGAGAUAUCGCGCGUCAAAU
novelMiR_5685	13.33	19	chrIII-10568212~10568320	CUAAGAGAUAUCGCGCGUCAAAU
novelMiR_7118	12.31	19	chrV-18037598~18037679	UAGUUUGUAGCCUGGCAGACC
novelMiR_3042	10.63	18	chrV+4649043~4649125	UCCCGAGCCUAUUUUUAUCGACU
novelMiR_290	13.45	16	chrI+3632118~3632196	UAUCGCACUCUUUGCCCUUCCG
novelMiR_2957	12.07	16	chrV+2851211~2851307	UGGGCAAGACUUUGGCAAAACU
novelMiR_7539	10.92	16	chrX-15447713~15447810	UGGGCAAGACUUUGGCAAAACU
novelMiR_3445	16.07	13	chrX+105950~106038	UUACCGACUCGGCCAAUCUGC
novelMiR_4563	10.79	13	chrI-14633744~14633826	UACCGGAUUUUGUAAUGAGACG
novelMiR_3899	11.19	9	chrI-788660~788786	GUUAAACAUAGCGGCGCGCGGA
novelMiR_1740	13.67	7	chrIII+8021406~8021492	UUUUCGGGGUACGGUAUCUAAU
novelMiR_5616	12.92	7	chrIII-8021402~8021488	UUUUCGGGGUACGGUAUCUAAU

## Sheet: 61 miRNAs
miRNA	mirDeep score	Read counts	Location	Sequence
novelMiR_1914	720.38	1033	chrIII+11829137~11829222	UGGGCGGAGCGAAUCGAUGAUU
novelMiR_921	83.8	141	chrII+4058306~4058386	UCGACCCUUGUGCCUGUUUCGGU
novelMiR_2766	61.16	93	chrIV+16808792~16808895	CCGCGCGCCGCUAUGUUUAACU
novelMiR_6523	62.77	92	chrIV-16169238~16169342	CCGCGCGCCGCUAUGUUUAACU
novelMiR_53	62.57	92	chrI+788660~788791	CCGCGCGCCGCUAUGUUUAACU
novelMiR_2216	47.68	87	chrIV+2078999~2079092	AUGGCCUAGUGGAUAAGAGGGA
novelMiR_7022	37.22	78	chrV-14656522~14656607	UGCCUUCUUUCCUUGUGUCGCCG
novelMiR_210	35.89	72	chrI+2538603~2538682	CGCGGGACUAGUCAAGUGUCGGC
novelMiR_179	55.81	69	chrI+2076510~2076597	GAUUUUUCGAUCAUUGGGGCAC
novelMiR_6149	36.37	63	chrIV-3233224~3233338	GAUGAGAUGCGAAGAGUAGGGCA
novelMiR_6012	39.64	59	chrIV-1021418~1021506	UAAGACAGCGGGCUCCACUACA
novelMiR_6962	34.11	55	chrV-11225516~11225601	AGACUUACUGUAGUUUUCGCCA
novelMiR_2057	26.08	48	chrIII+13259227~13259321	UGGCGAUGAGUGCUCUAGCAAGA
novelMiR_2822	26.64	46	chrV+1007976~1008073	UUACCUAUCGGCUUUAAAUGUA
novelMiR_5714	26.39	46	chrIII-11177193~11177276	UUACCUAUCGGCUUUAAAUGUA
novelMiR_629	26.39	46	chrI+13584252~13584335	UUACCUAUCGGCUUUAAAUGUA
novelMiR_6589	26.39	46	chrV-351395~351478	UUACCUAUCGGCUUUAAAUGUA
novelMiR_1859	26.37	46	chrIII+11177197~11177280	UUACCUAUCGGCUUUAAAUGUA
novelMiR_2792	26.37	46	chrV+351399~351482	UUACCUAUCGGCUUUAAAUGUA
novelMiR_4476	26.37	46	chrI-13584248~13584331	UUACCUAUCGGCUUUAAAUGUA
novelMiR_3949	26.28	46	chrI-1386680~1386777	UUACCUAUCGGCUUUAAAUGUA
novelMiR_108	26.26	46	chrI+1386670~1386767	UUACCUAUCGGCUUUAAAUGUA
novelMiR_4967	26.24	46	chrII-12129182~12129265	UUACCUAUCGGCUUUAAAUGUA
novelMiR_1887	26.22	46	chrIII+11498457~11498540	UUACCUAUCGGCUUUAAAUGUA
novelMiR_5883	26.16	46	chrIII-12708489~12708572	UUACCUAUCGGCUUUAAAUGUA
novelMiR_5921	25.93	46	chrIII-13088130~13088213	UUACCUAUCGGCUUUAAAUGUA
novelMiR_4980	25.81	46	chrII-12263455~12263538	UUACCUAUCGGCUUUAAAUGUA
novelMiR_1348	25.78	46	chrII+15222348~15222431	UUACCUAUCGGCUUUAAAUGUA
novelMiR_239	25.61	46	chrI+3017334~3017417	UUACCUAUCGGCUUUAAAUGUA
novelMiR_4108	25.61	46	chrI-3002162~3002245	UUACCUAUCGGCUUUAAAUGUA
novelMiR_7190	25.58	46	chrV-20096624~20096707	UUACCUAUCGGCUUUAAAUGUA
novelMiR_2040	25.25	46	chrIII+13088134~13088217	UUACCUAUCGGCUUUAAAUGUA
novelMiR_3453	23.29	46	chrX+251544~251627	UUACCUAUCGGCUUUAAAUGUA
novelMiR_2009	25.62	45	chrIII+12708493~12708575	UUACCUAUCGGCUUUAAAUGUA
novelMiR_2007	25.38	45	chrIII+12701710~12701792	UUACCUAUCGGCUUUAAAUGUA
novelMiR_3938	29.3	43	chrI-1259114~1259195	UUACCUAUCGGCUUUAAAUGUA
novelMiR_1121	25.3	43	chrII+12263445~12263540	UUACCUAUCGGCUUUAAAUGUA
novelMiR_5236	25.23	43	chrII-15222346~15222441	UUACCUAUCGGCUUUAAAUGUA
novelMiR_4870	24.42	34	chrII-8877419~8877496	CAGACUACGAUCGCUACCGGGU
novelMiR_2554	15.86	33	chrIV+10856088~10856169	UUGGUUCAGGAAUGGGCGGAACU
novelMiR_5777	23.33	31	chrIII-11936806~11936891	ACUCGAGGCCGGUGAGCUGCGU
novelMiR_4603	12.58	31	chrII-434826~434909	GAUGGCUGGAAUAUCGGUAUUC
novelMiR_4584	15.86	28	chrII-18627~18708	ACUGCUCAAAGGACUUUGCUGC
novelMiR_773	15.75	28	chrII+18627~18708	ACUGCUCAAAGGACUUUGCUGC
novelMiR_5841	23.54	27	chrIII-12420284~12420374	UGGGCGGAGCGAGUCGCUGAUU
novelMiR_1408	15.19	26	chrIII+498758~498835	AUACCCAACUUUGGUCUGCUAAA
novelMiR_1409	15.19	26	chrIII+498944~499021	AUACCCAACUUUGGUCUGCUAAA
novelMiR_7410	12.3	24	chrX-7882706~7882786	UGAACAUCAUUCAGGGCAUUAC
novelMiR_4154	16.43	22	chrI-3632116~3632194	UAUCGCACUCUUUGCCCUUCCG
novelMiR_405	16.41	20	chrI+7779820~7779953	CCGCCCACAGAACUGUACCUUGC
novelMiR_4263	16.41	20	chrI-7782005~7782138	CCGCCCACAGAACUGUACCUUGC
novelMiR_7005	16.04	20	chrV-13647893~13648002	CCGCCCACAGAACUGUACCUUGC
novelMiR_6564	18.95	19	chrIV-17247728~17247859	CUAAGAGAUAUCGCGCGUCAAAU
novelMiR_5685	13.33	19	chrIII-10568212~10568320	CUAAGAGAUAUCGCGCGUCAAAU
novelMiR_7118	12.31	19	chrV-18037598~18037679	UAGUUUGUAGCCUGGCAGACC
novelMiR_3042	10.63	18	chrV+4649043~4649125	UCCCGAGCCUAUUUUUAUCGACU
novelMiR_290	13.45	16	chrI+3632118~3632196	UAUCGCACUCUUUGCCCUUCCG
novelMiR_2957	12.07	16	chrV+2851211~2851307	UGGGCAAGACUUUGGCAAAACU
novelMiR_7539	10.92	16	chrX-15447713~15447810	UGGGCAAGACUUUGGCAAAACU
novelMiR_3445	16.07	13	chrX+105950~106038	UUACCGACUCGGCCAAUCUGC
novelMiR_4563	10.79	13	chrI-14633744~14633826	UACCGGAUUUUGUAAUGAGACG
